# Supplementary material
Source: publisher figshare collection journal article supplement (https://acs.figshare.com/ndownloader/files/4014265)
Supplement: Supplementary file 1 [file 4014265]

# Stereospecific Asymmetric N-Heterocyclic Carbene (NHC)- Catalyzed Redox Synthesis of Trifluoromethyl Dihydropyranones and Mechanistic Insights

Alyn T. Davies,<sup>†</sup> James E. Taylor,<sup>†</sup> James Douglas,<sup>†</sup> Christopher J. Collett,<sup>†</sup>  
Louis C. Morrill,<sup>†</sup> Charlene Fallan,<sup>†</sup> Alexandra M. Z. Slawin,<sup>†</sup> Gwydion Churchill,<sup>‡</sup> and  
Andrew D. Smith<sup>\*,†</sup>

<sup>†</sup>*EaStCHEM, School of Chemistry, University of St Andrews, North Haugh, St Andrews, KY16 9ST, United Kingdom*

<sup>‡</sup>*AstraZeneca, Process Research and Development, Macclesfield, Cheshire, SK10 2NA, United Kingdom*

E-mail: ads10@st-andrews.ac.uk

## Contents

|                                                       |     |
|-------------------------------------------------------|-----|
| <b>Epimerisation of <i>syn</i>-15</b> .....           | S2  |
| <b>Kinetic Profiles</b> .....                         | S4  |
| <i>Reaction profiles with achiral NHC 7</i> .....     | S4  |
| <i>Reaction profiles with chiral NHC 1</i> .....      | S7  |
| <i>Studies on isolated adduct 29</i> .....            | S10 |
| <i>Studies on O-acylated enolate 30</i> .....         | S12 |
| <b>Kinetic Isotope Effect</b> .....                   | S13 |
| <b>NMR Data</b> .....                                 | S16 |
| <i>Compounds from Table 2</i> .....                   | S16 |
| <i>Compounds from Table 3</i> .....                   | S40 |
| <i>Derivatisations</i> .....                          | S50 |
| <i>Adduct 29</i> .....                                | S58 |
| <i>O-Acylated enolate 30</i> .....                    | S60 |
| <b>HPLC Data</b> .....                                | S62 |
| <i>Compounds from Table 2</i> .....                   | S62 |
| <i>Compounds from Table 3</i> .....                   | S74 |
| <i>Derivatisations</i> .....                          | S79 |
| <b>X-Ray Crystal Structure of <i>syn</i>-12</b> ..... | S81 |

## Epimerisation of *syn*-**15**

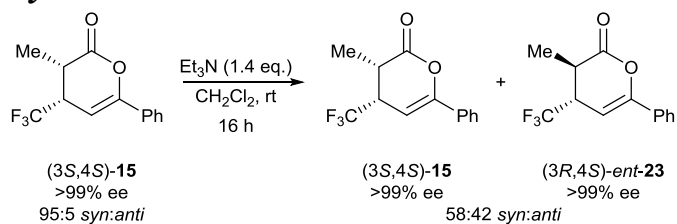

(3*S*,4*S*)-3-Methyl-6-phenyl-4-(trifluoromethyl)-3,4-dihydro-2*H*-pyran-2-one **15** (51.2 mg, 0.200 mmol, 1.0 eq.) was dissolved in CH<sub>2</sub>Cl<sub>2</sub> (4 mL), followed by addition for Et<sub>3</sub>N (39.0  $\mu$ L, 0.280 mmol, 1.4 eq.) and the reaction was left stirring for 16 hours at RT. The mixture was diluted with CH<sub>2</sub>Cl<sub>2</sub>, washed with 1M HCl, dried over Na<sub>2</sub>SO<sub>4</sub>, filtered and concentrated *in vacuo* to leave a white crystalline solid (49.3 mg, 0.192 mmol, 96%). Chiral HPLC analysis; Chiralcel OD-H (99:1 hexane : IPA, flow rate 1 mLmin<sup>-1</sup>, 254 nm, 30 °C) *t<sub>R</sub>*(3*R*,4*S*): 12.7 min, *t<sub>R</sub>*(3*S*,4*R*): 16.4 min, *t<sub>R</sub>*(3*S*,4*S*): 24.0 min, *t<sub>R</sub>*(3*R*,4*R*): 41.3 min, >99% ee (*syn*), >99% ee (*anti*).

See overleaf for relevant HPLC traces.

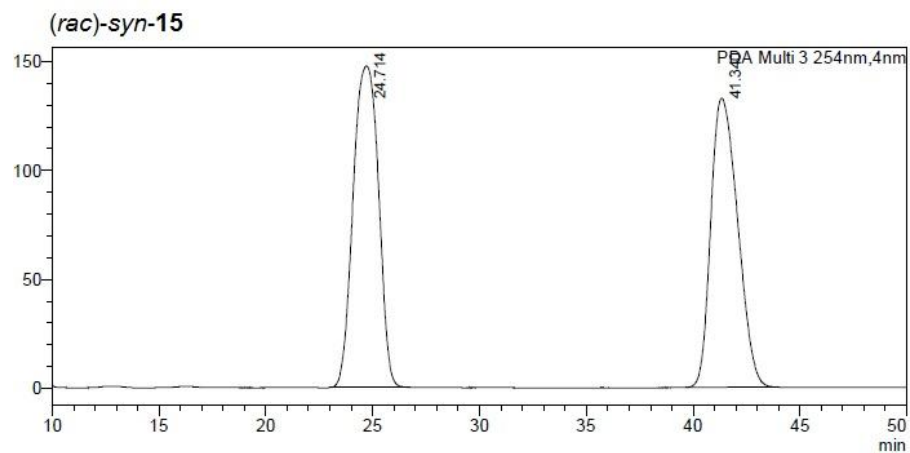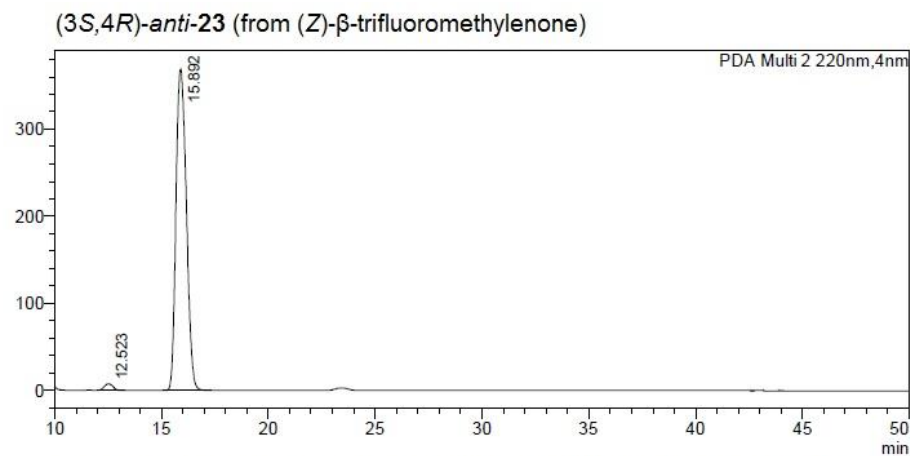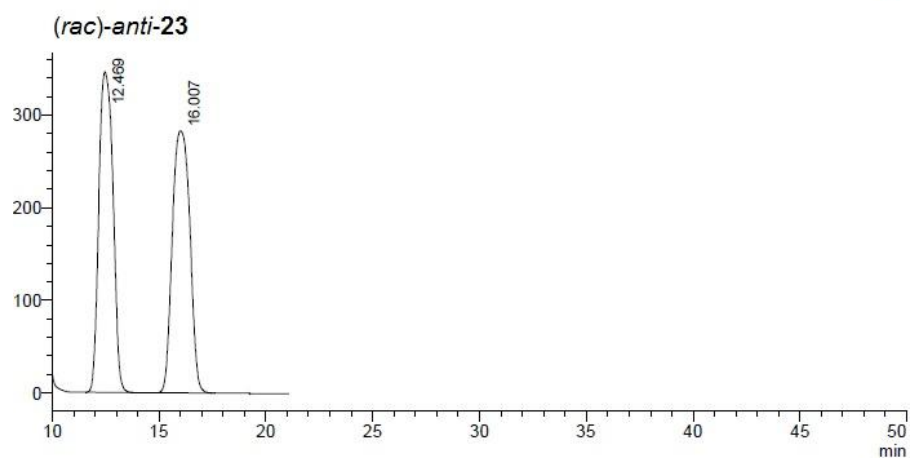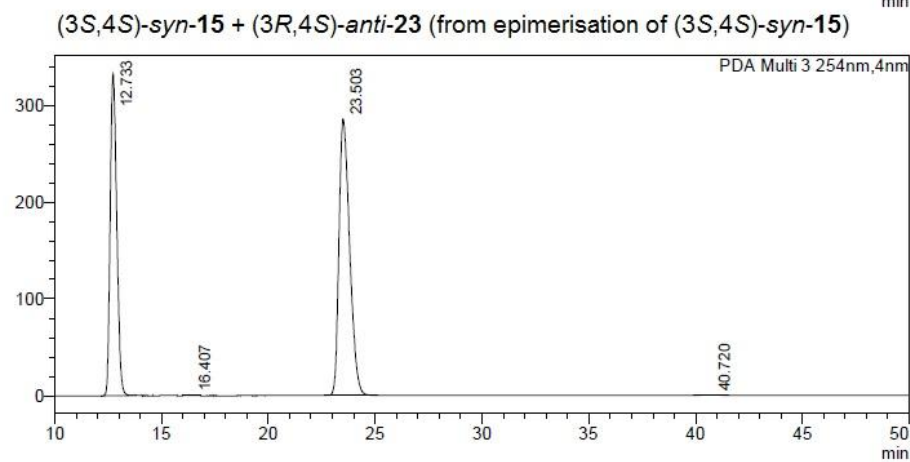

## Kinetic Profiles

### Reaction Monitoring via $^1\text{H}$ NMR

The concentrations of reactants, intermediates and products were determined from the integral of the species itself, relative to the integral of the internal standard tetramethylsilane (TMS). The concentration of the internal standard was set relative to the integral corresponding to the major substrate at  $t=0$ , which corresponded to a known starting concentration.

### Reaction Profiles with Achiral NHC **7**

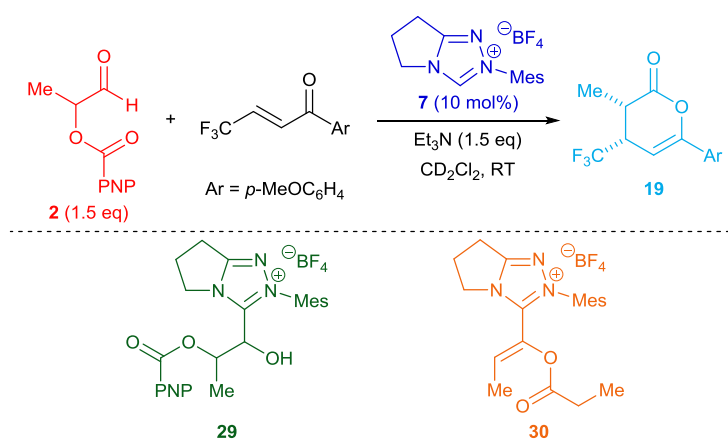

In an NMR tube, aldehyde **2** (12.6 mg, 0.0563 mmol),  $\beta$ -trifluoromethyl enone (8.6 mg 0.0375 mmol) and NHC precatalyst **7** (1.2 mg, 0.00375 mmol) were dissolved in CD<sub>2</sub>Cl<sub>2</sub> (0.75 mL, ~3 mM TMS). The reaction was initiated by the addition of NEt<sub>3</sub> (7.8  $\mu$ L, 0.0563 mmol) and monitored by  $^1\text{H}$  NMR spectroscopy (400 MHz) at ambient temperature. Representative  $^1\text{H}$  NMR spectra taken at intervals over the course of the reaction are shown in Figure S1. Spectra of isolated starting materials, intermediates and product are shown in Figure S3.

**Figure S1:** Representative  $^1\text{H}$  NMR spectra for the reaction with achiral NHC precatalyst **7**.

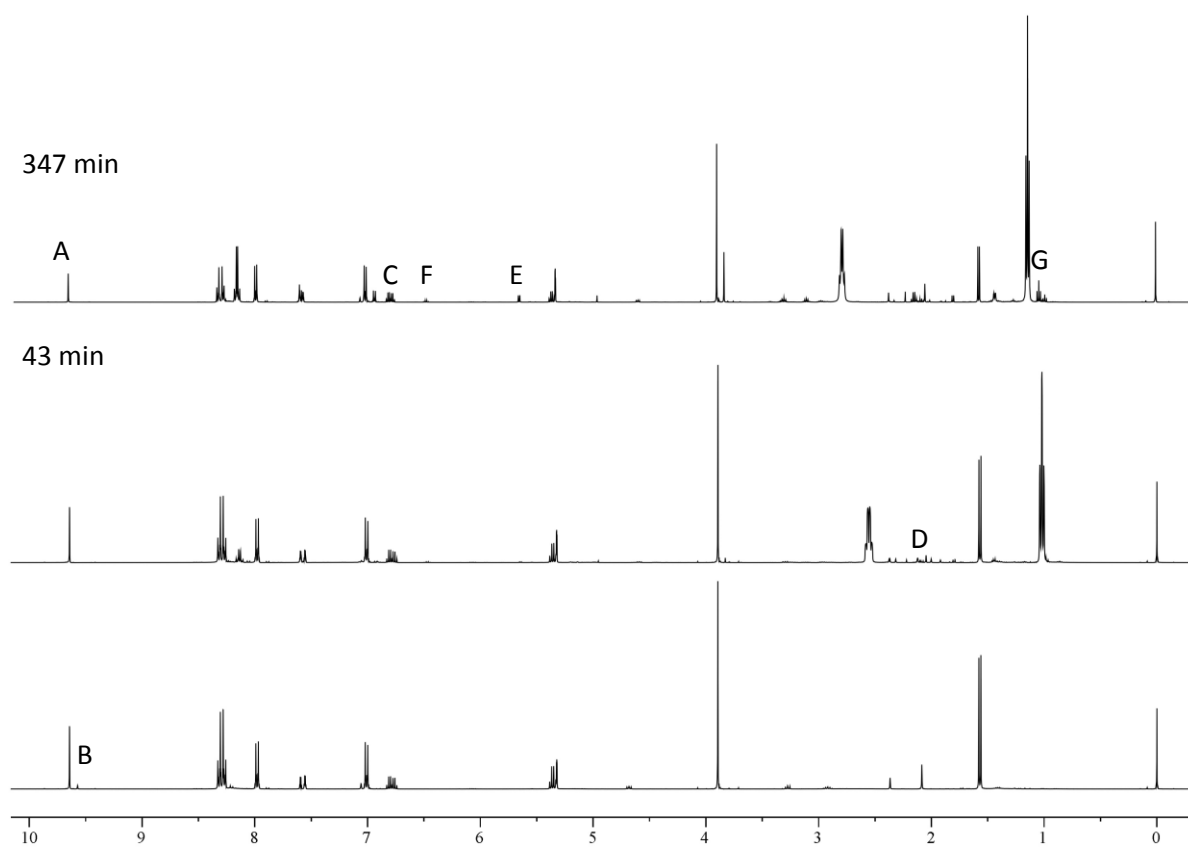

**Figure S2:** Reaction profile for the reaction with achiral NHC precatalyst **7**.

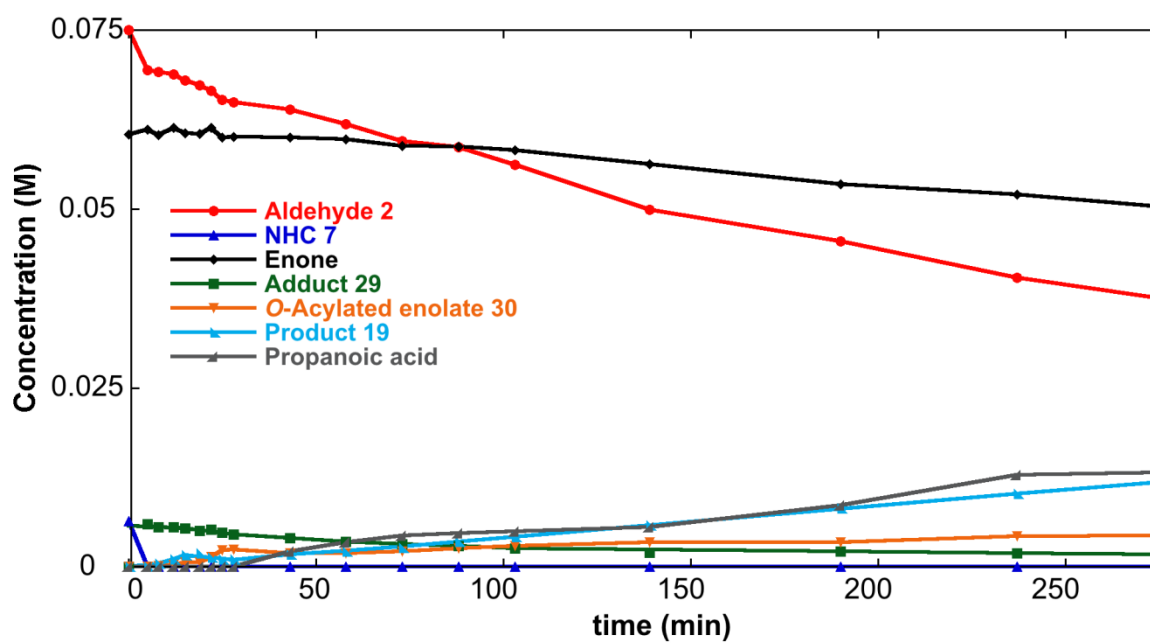

**Figure S3:**  $^1\text{H}$  NMR spectra of starting materials, intermediates and product in  $\text{CD}_2\text{Cl}_2$ .

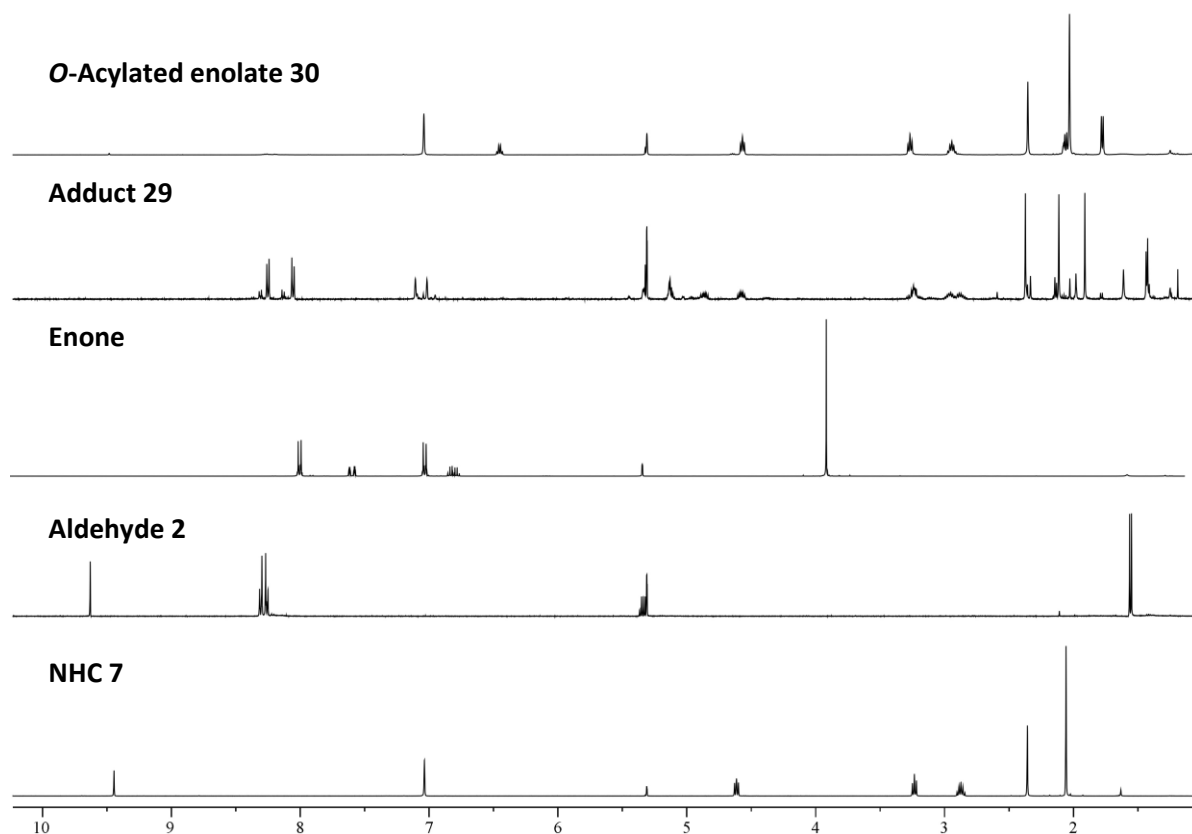

The concentration of aldehyde **2** was determined using the singlet at 9.64 ppm (A), corresponding to the aldehyde  $\text{C}=\text{O}(\text{H})$ . The singlet at 9.57 ppm (B) was used to determine the concentration of NHC precursor **7**, which was assigned to the triazole CH. The concentration of enone was determined using the multiplet at 6.78 ppm. Initially a new set of peaks was observed which was assigned to the intermediate **29**, the concentration of both diastereoisomers was calculated sum of the singlets at 2.00 and 1.92 ppm (D), corresponding to the  $\text{Ar}-\text{CH}_3$  groups. Over time the formation of product **19** was seen and the concentration was determined using the doublet at 4.28 ppm (E). Additionally, the formation of **30** was observed, the concentration of which was determined from the quartet at 6.47 ppm (F). Propanoic acid was also seen and the triplet at 1.07 ppm was used to determine the concentration. The presence of propanoic acid was also confirmed by doping of the experiment with a pure sample.

### Reaction Profiles with Chiral NHC **1**

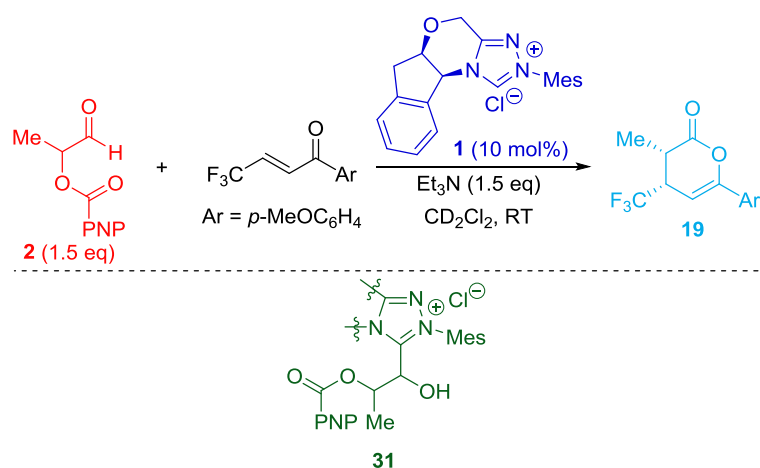

In an NMR tube, aldehyde **2** (12.6 mg, 0.0563 mmol),  $\beta$ -trifluoromethyl enone (8.6 mg 0.0375 mmol) and NHC precatalyst **1** (1.4 mg, 0.00375 mmol) were dissolved in CD<sub>2</sub>Cl<sub>2</sub> (0.75 mL, ~3 mM TMS). The reaction was initiated by the addition of NEt<sub>3</sub> (7.8  $\mu$ L, 0.0563 mmol) and monitored by <sup>1</sup>H NMR spectroscopy (400 MHz) at ambient temperature. Representative <sup>1</sup>H NMR spectra taken at intervals over the course of the reaction are shown in Figure S4. A spectrum of NHC precatalyst **1** is also shown.

**Figure S4:** Representative  $^1\text{H}$  NMR spectra for the reaction with chiral NHC precatalyst **1**.

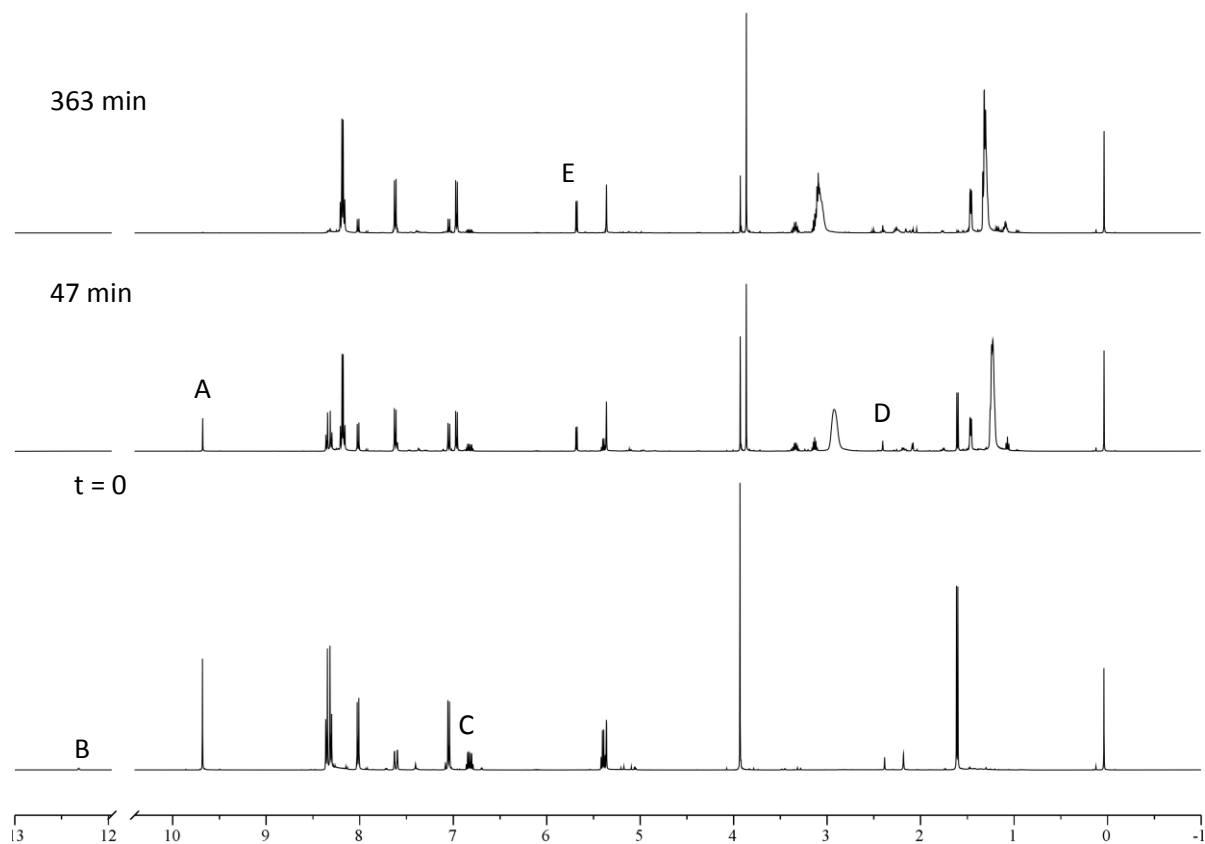

**Figure S5:** Reaction profile for the reaction with chiral NHC precatalyst **1**.

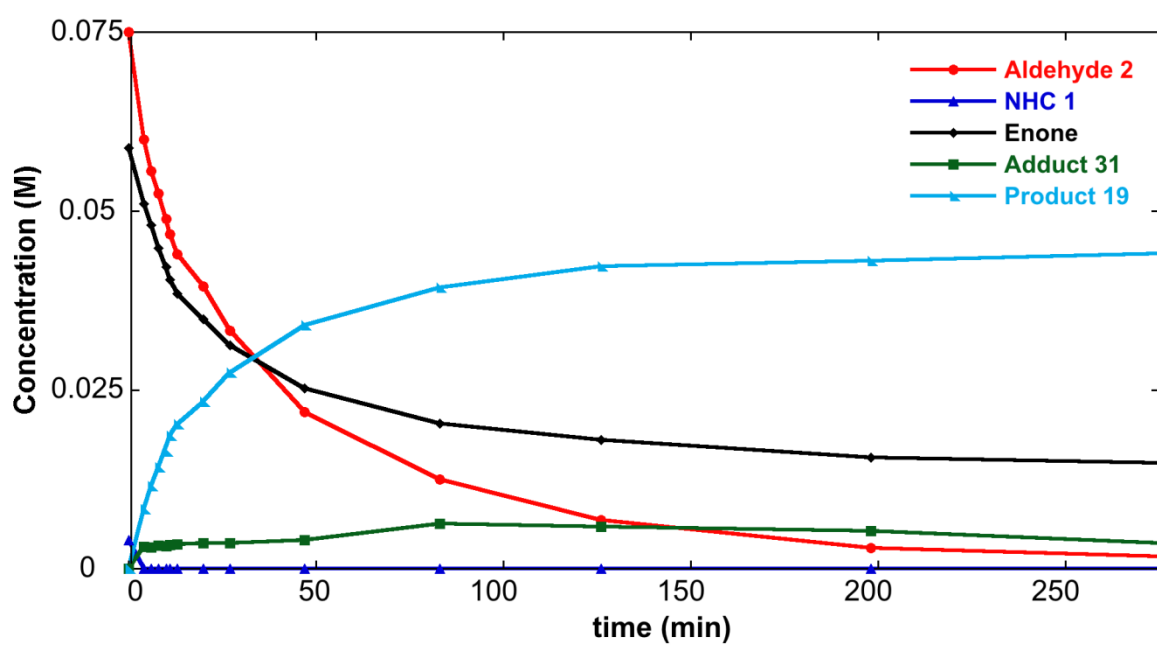



**<sup>1</sup>H NMR of NHC **1****

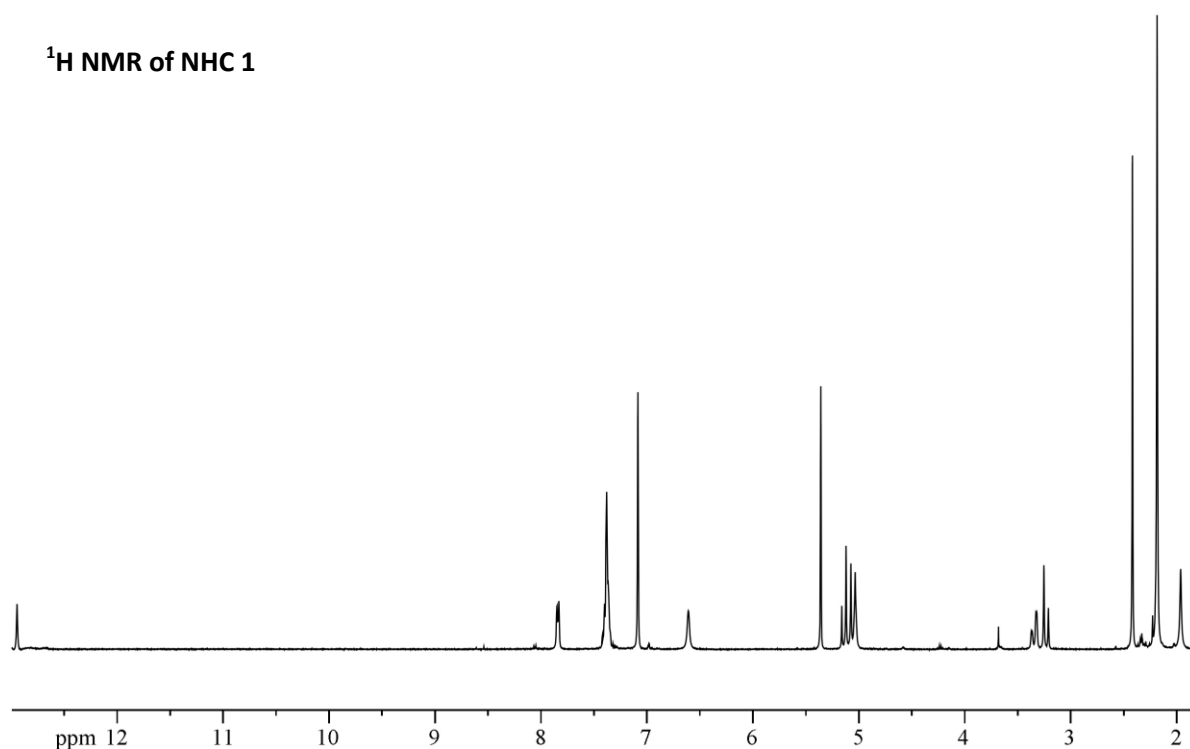

Concentrations of aldehyde **2** (A), enone (C) and product **19** (E) were determined as previously described. In this system, the concentration of NHC precursor was determined using the singlet at 12.32 ppm which was assigned to the triazole CH of **1**. The signals for the initially formed NHC-aldehyde addition product were assigned by analogy to **31**. The concentration was determined using the singlet at 2.41 ppm, corresponding to the Ar-CH<sub>3</sub> group.

*Studies on isolated adduct 29*

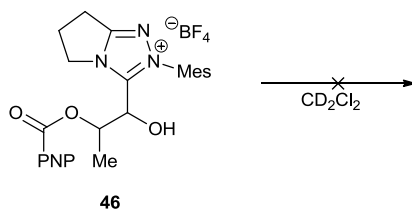

A 0.01 M solution of **29** was monitored *via* <sup>1</sup>H NMR spectroscopy at r.t. over 2d. Over the course of the experiment no change in the integrals of any of the signals was observed relative to the internal standard. Representative NMR spectra are shown in Figure S6.

**Figure S6:** <sup>1</sup>H NMR spectra showing the stability of intermediate **29** in CD<sub>2</sub>Cl<sub>2</sub>.

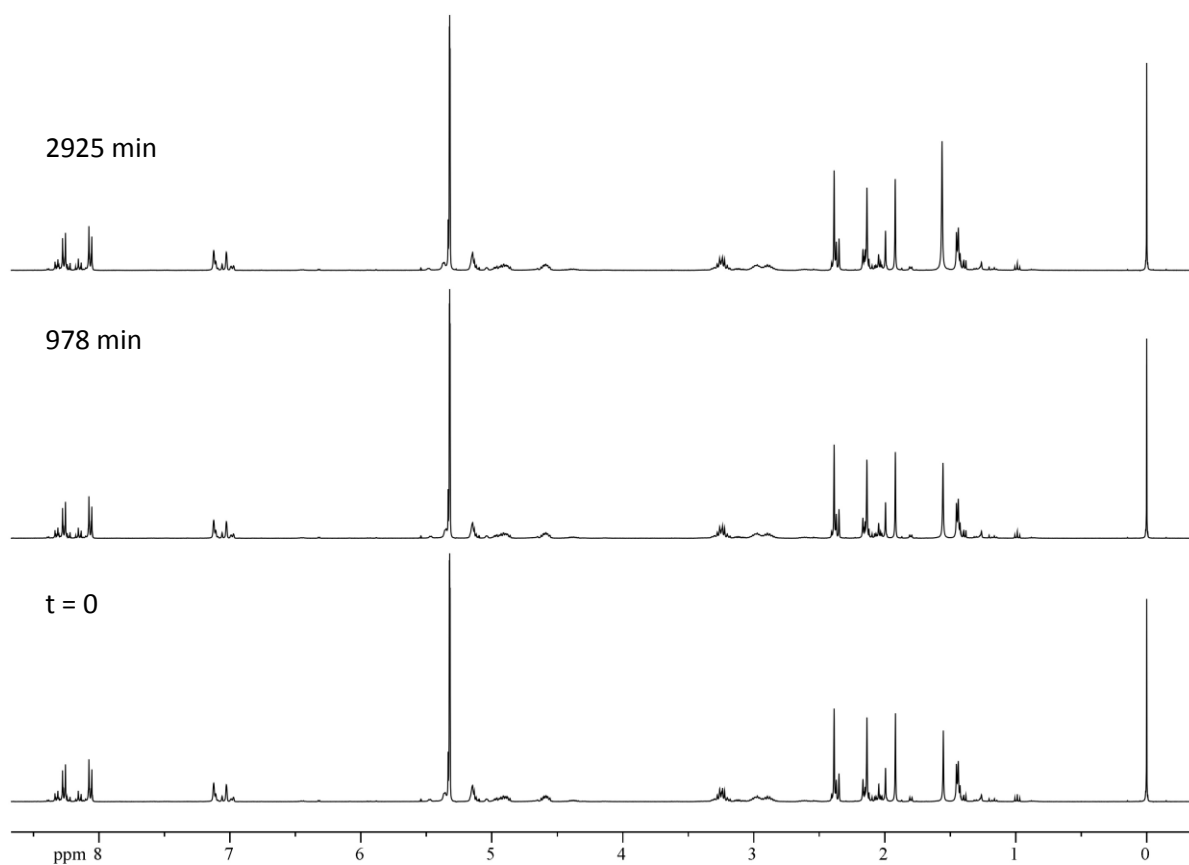

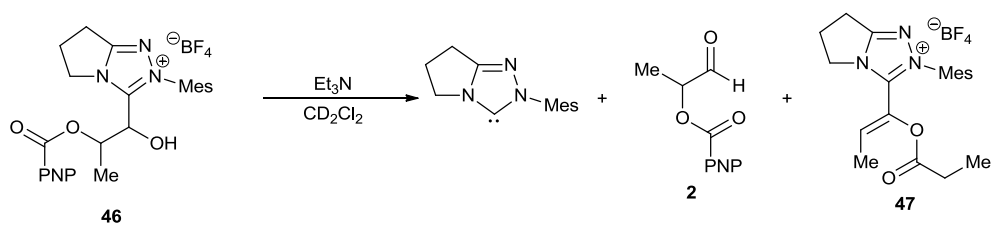

To a 0.01 M solution of **29** was added  $\text{NEt}_3$  (1.1  $\mu\text{L}$  0.01 M) and the solution was monitored *via*  $^1\text{H}$  NMR spectroscopy at r.t. over eight hours. Representative  $^1\text{H}$  NMR spectra are shown in Figure S7.

**Figure S7:**  $^1\text{H}$  NMR spectra showing the reaction of intermediate **29** with  $\text{Et}_3\text{N}$  in  $\text{CD}_2\text{Cl}_2$ .

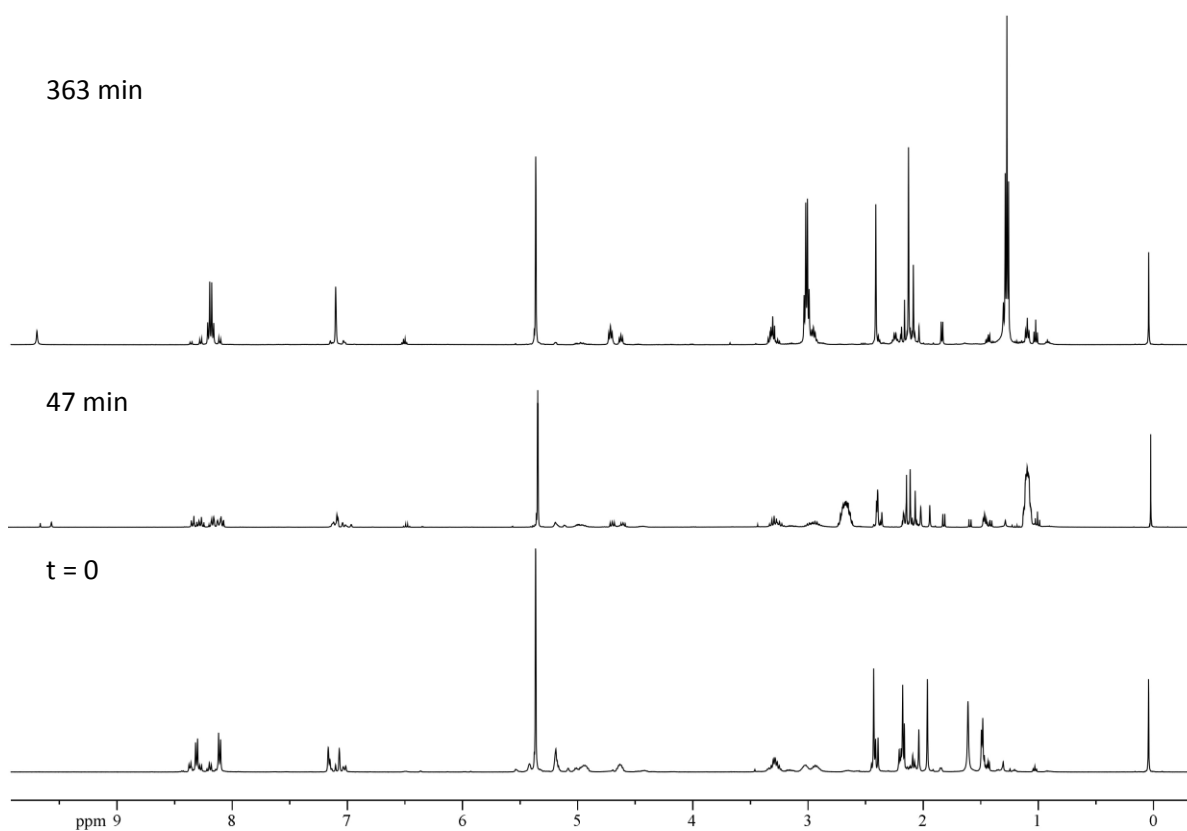

## Studies on *O*-Acylated Enolate **30**

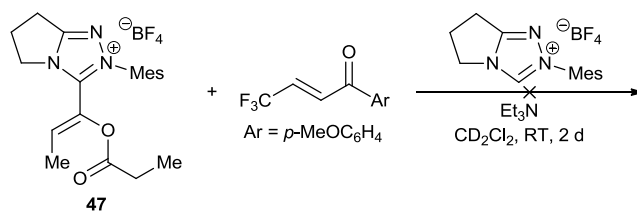

To a 0.02 M solution of **30**, containing 4 mM triazolium salt **7** and 0.02 M enone was added NEt<sub>3</sub> (0.4  $\mu$ L 4 mM) and the solution was monitored *via* <sup>1</sup>H NMR spectroscopy at r.t. over 2d. Over the course of the experiment no change in the integrals of any of the signals was observed relative to the internal standard. Representative <sup>1</sup>H NMR spectra are shown in Figure S8.

**Figure S8:** <sup>1</sup>H NMR spectra showing the stability of *O*-acylated enolate **30** in CD<sub>2</sub>Cl<sub>2</sub>.

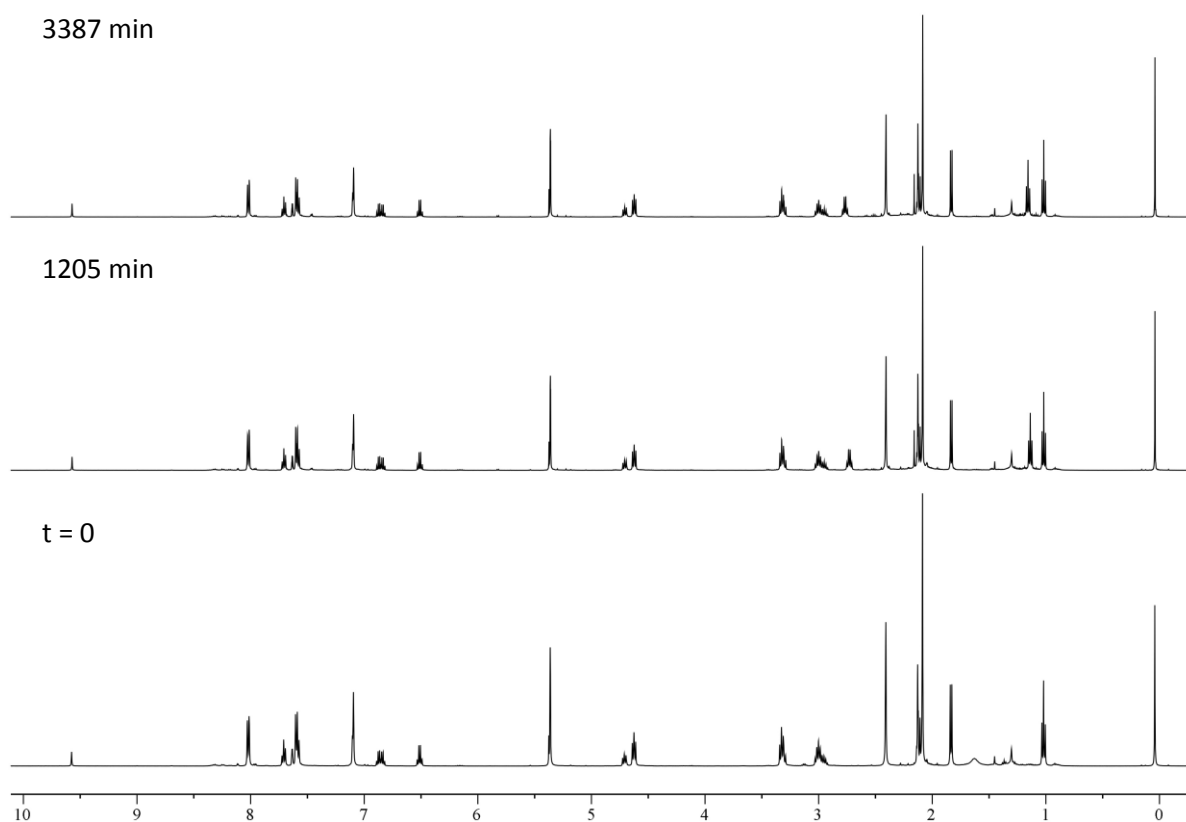

## Kinetic Isotope Effect

### Kinetics with $\alpha$ -aroyloxyaldehyde **5**

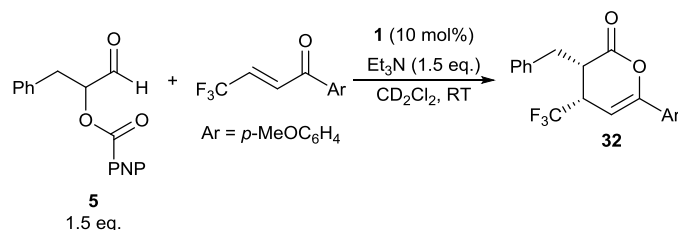

Aldehyde **5** (300  $\mu$ L of a 0.0938 M solution in CD<sub>2</sub>Cl<sub>2</sub>),  $\beta$ -trifluoromethyl enone (300  $\mu$ L of a 0.0625 M solution in CD<sub>2</sub>Cl<sub>2</sub>) and NHC precatalyst **1** (150  $\mu$ L of a 0.0125 M solution in CD<sub>2</sub>Cl<sub>2</sub>) were added to an NMR tube. The reaction was initiated by the addition of Et<sub>3</sub>N (3.9  $\mu$ L, 0.028 mmol) and monitored by <sup>1</sup>H NMR spectroscopy (500 MHz). Representative <sup>1</sup>H NMR spectra are shown in Figure S9. Concentrations of aldehyde **5**, enone and product **32** were monitored over time relative to an internal standard of TMS. A plot of enone concentration versus time is shown in Figure S11.

### Kinetics with $\alpha$ -aroyloxyaldehyde **5-D**

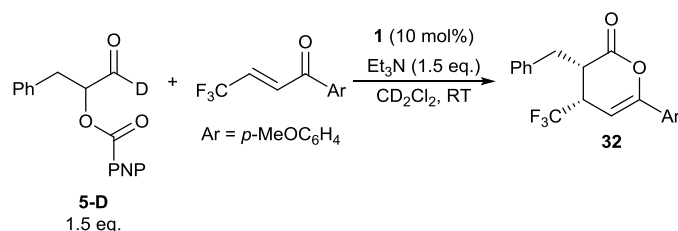

Aldehyde **5-D** (300  $\mu$ L of a 0.0938 M solution in CD<sub>2</sub>Cl<sub>2</sub>),  $\beta$ -trifluoromethyl enone (300  $\mu$ L of a 0.0625 M solution in CD<sub>2</sub>Cl<sub>2</sub>) and NHC precatalyst **1** (150  $\mu$ L of a 0.0125 M solution in CD<sub>2</sub>Cl<sub>2</sub>) were added to an NMR tube. The reaction was initiated by the addition of Et<sub>3</sub>N (3.9  $\mu$ L, 0.028 mmol) and monitored by <sup>1</sup>H NMR spectroscopy (500 MHz). Representative <sup>1</sup>H NMR spectra are shown in Figure S10. Concentrations of aldehyde **5-D**, enone and product **32** were monitored over time relative to an internal standard of TMS. A plot of enone concentration versus time is shown in Figure S11.

**Figure S9:** Representative  $^1\text{H}$  NMR spectra for kinetics with aldehyde **5**.

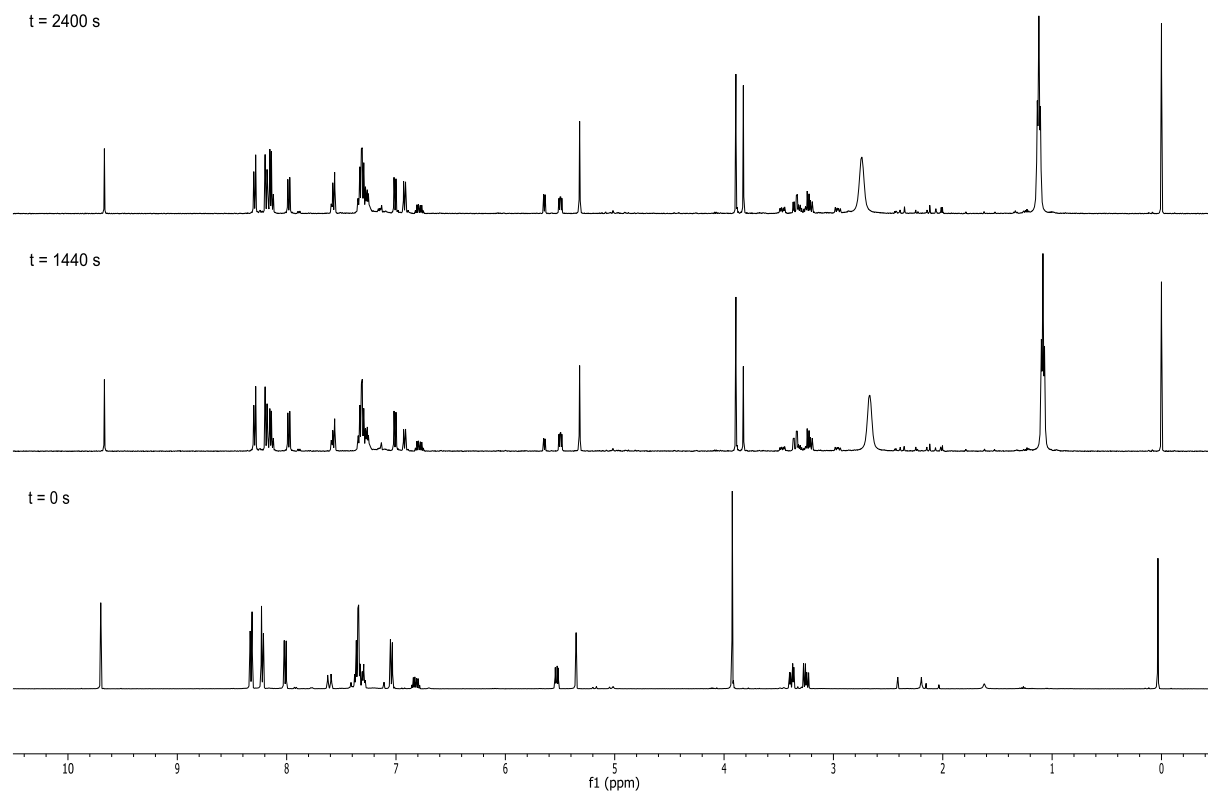

**Figure S10:** Representative  $^1\text{H}$  NMR spectra for kinetics with aldehyde **5-D**.

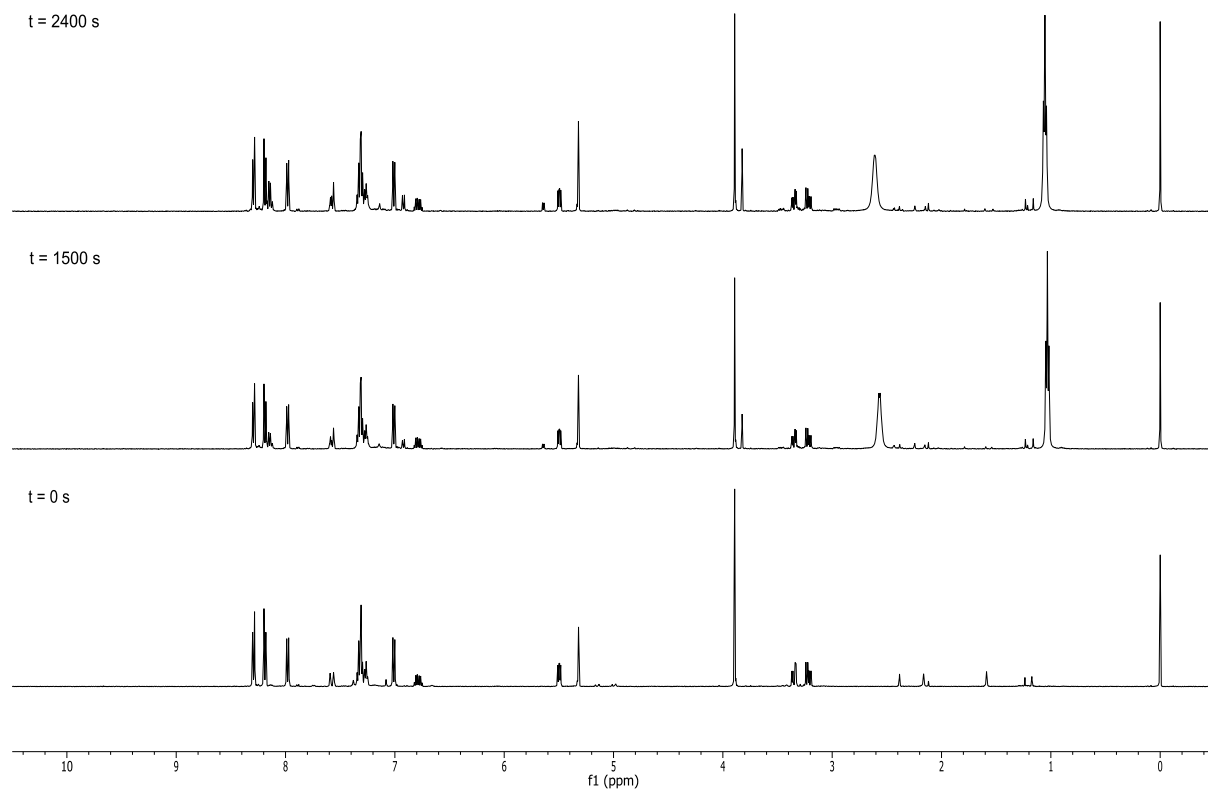

**Figure S11:** Plot of  $\beta$ -trifluoromethyl enone concentration over time

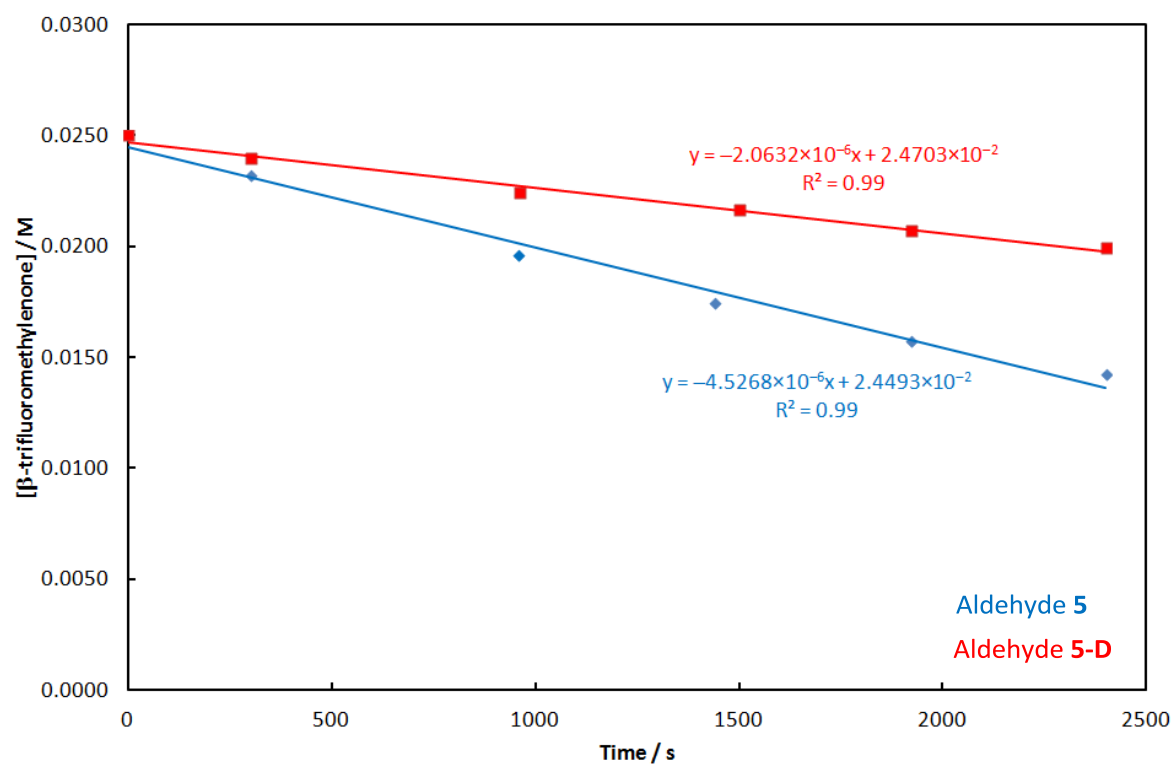

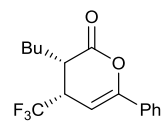

**8**

<sup>1</sup>H, CDCl<sub>3</sub>, 500 MHz

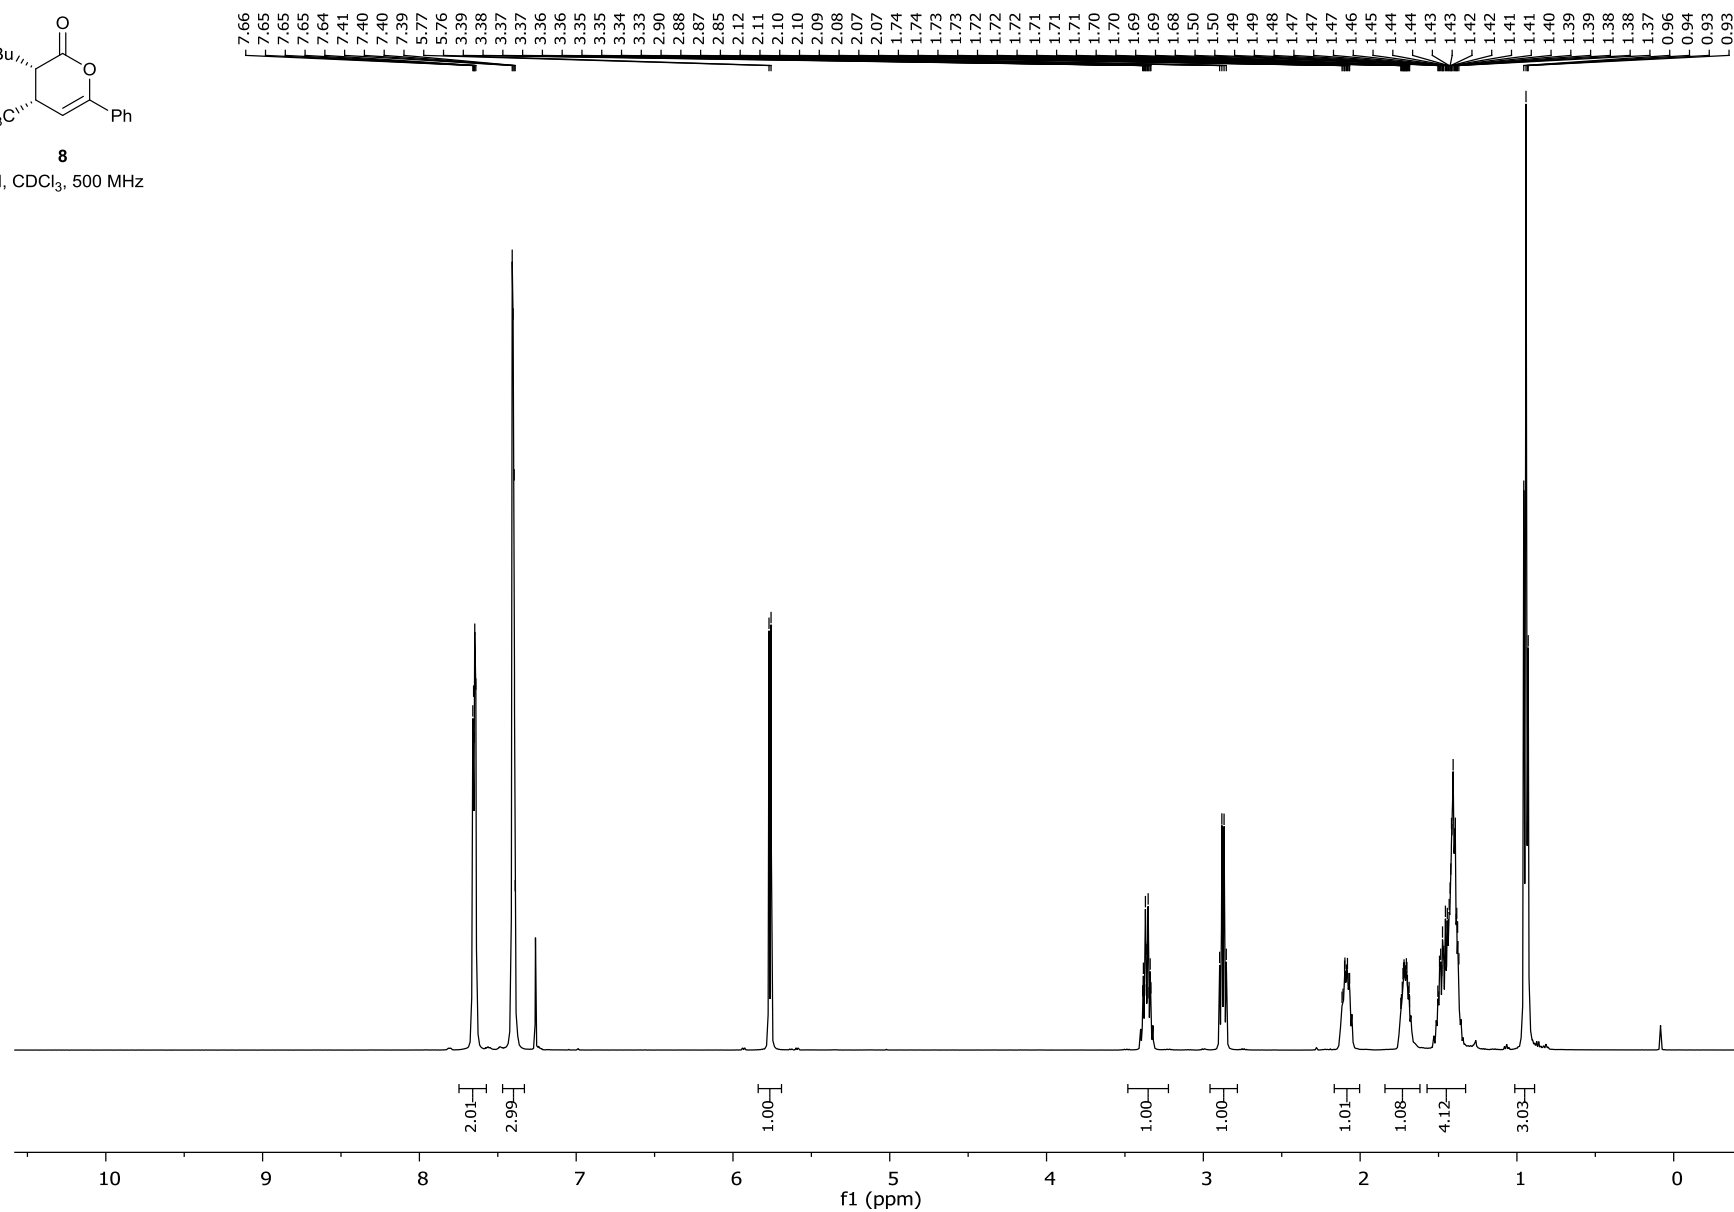



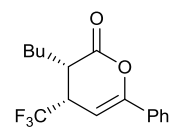

**8**  
 $^{13}\text{C}$ ,  $\text{CDCl}_3$ , 101 MHz

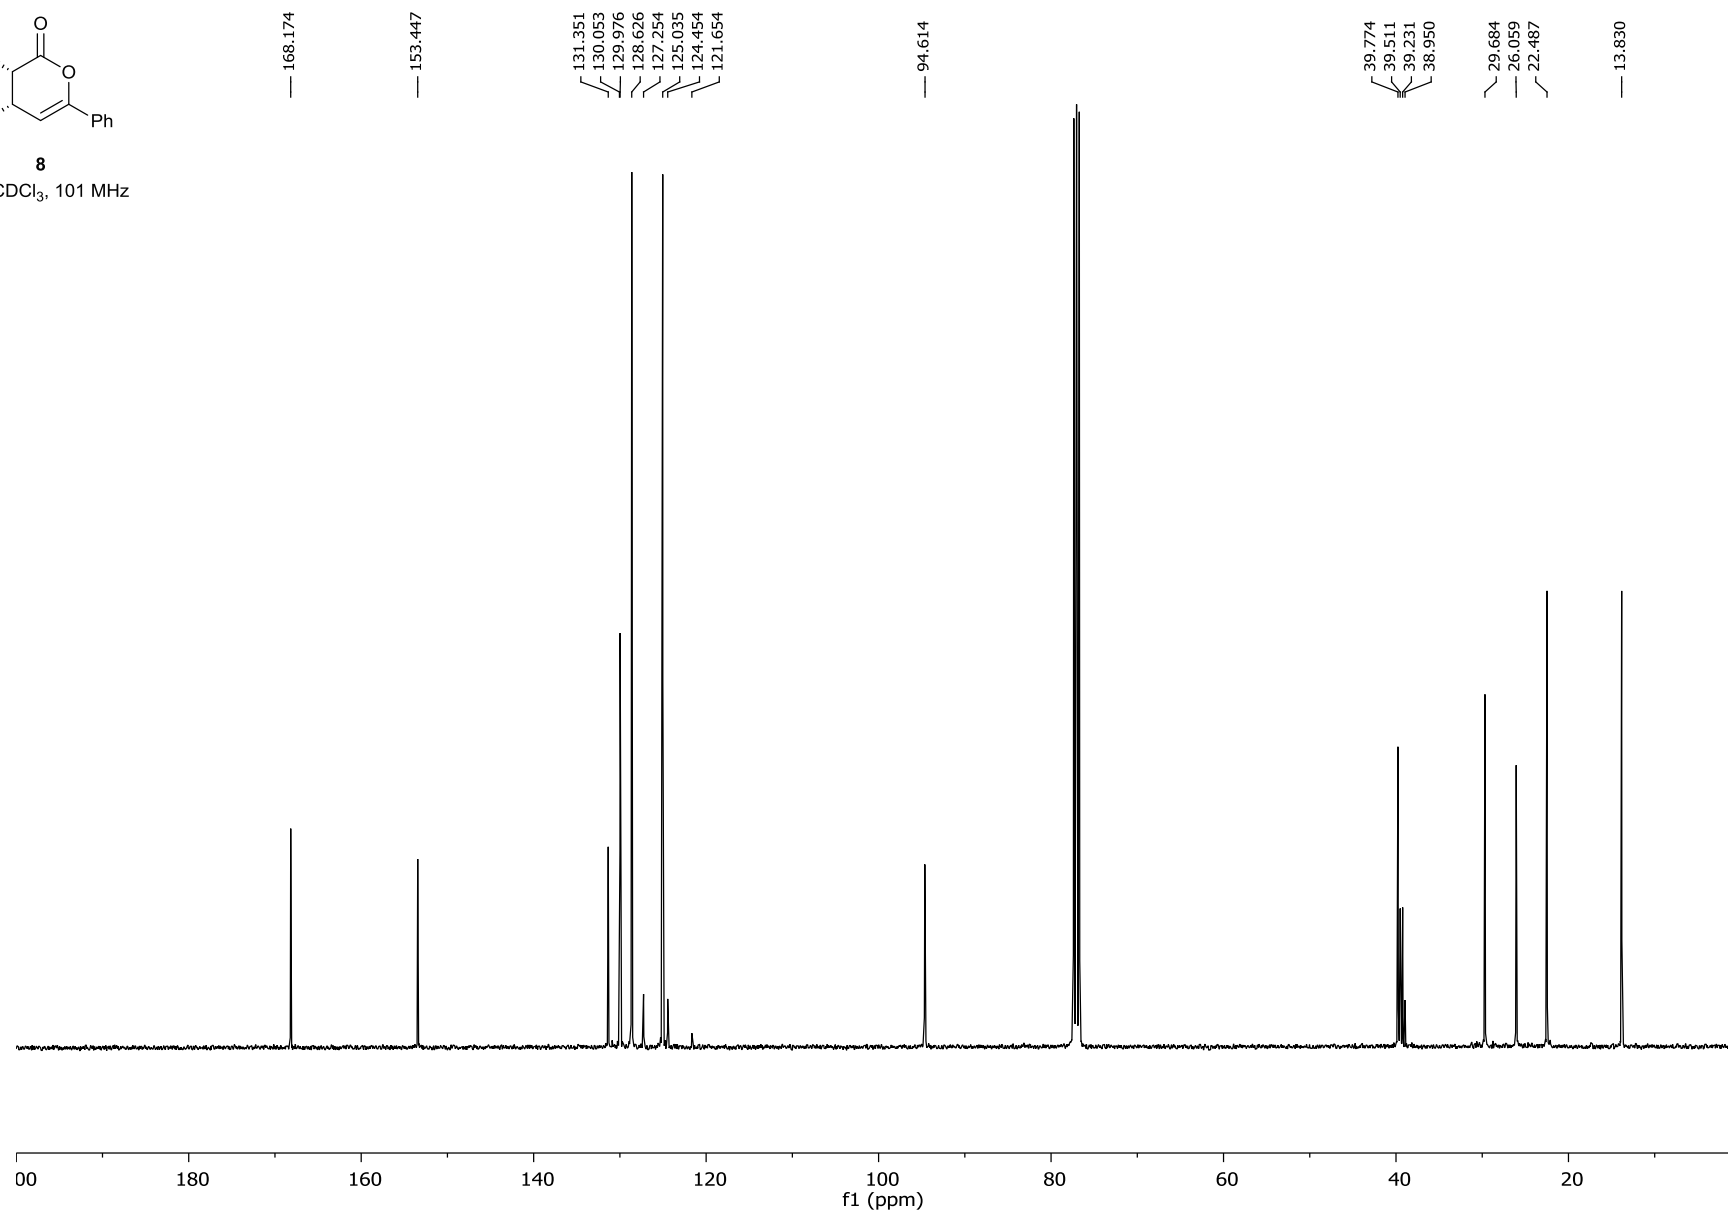

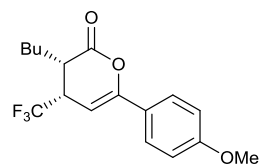

**9**  
 $^1\text{H}$ ,  $\text{CDCl}_3$ , 500 MHz

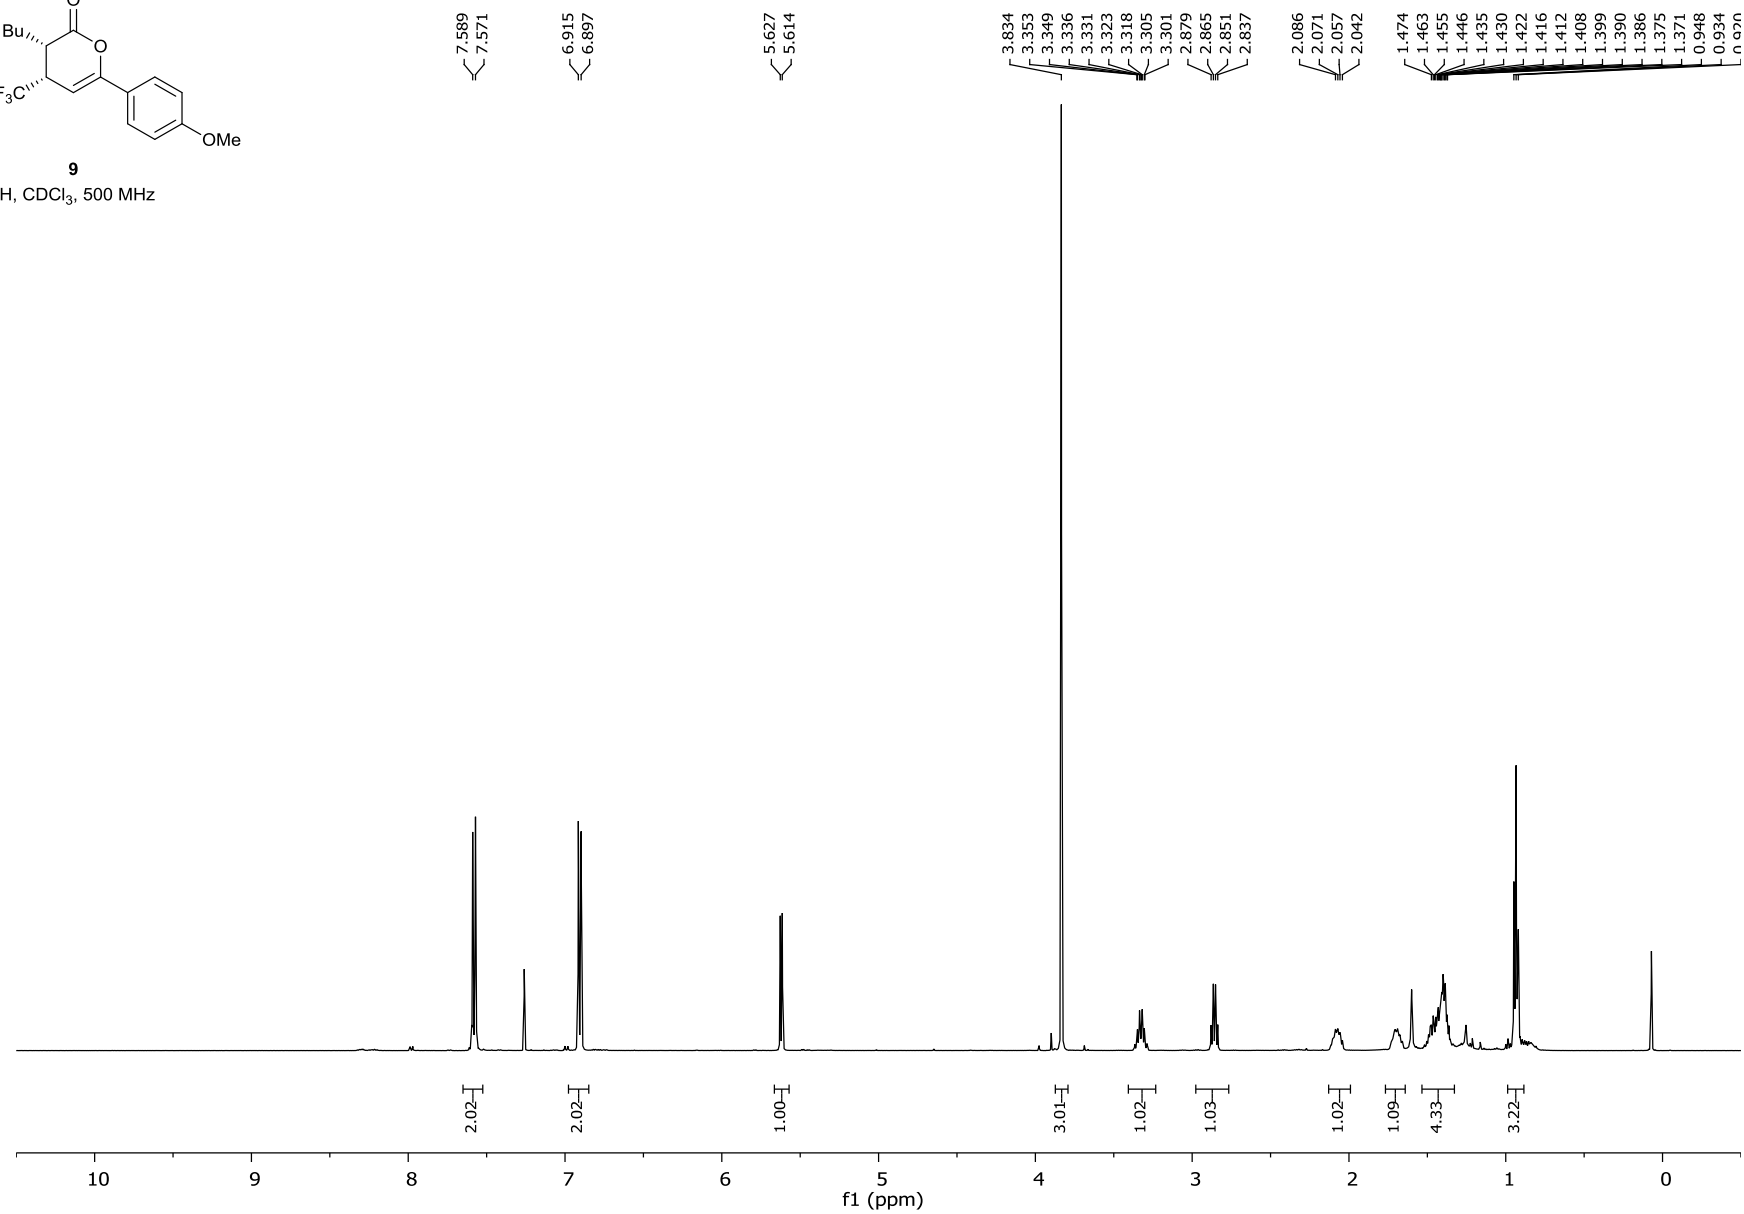

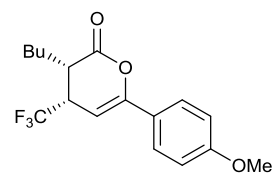

**9**

$^{13}\text{C}$ ,  $\text{CDCl}_3$ , 126 MHz

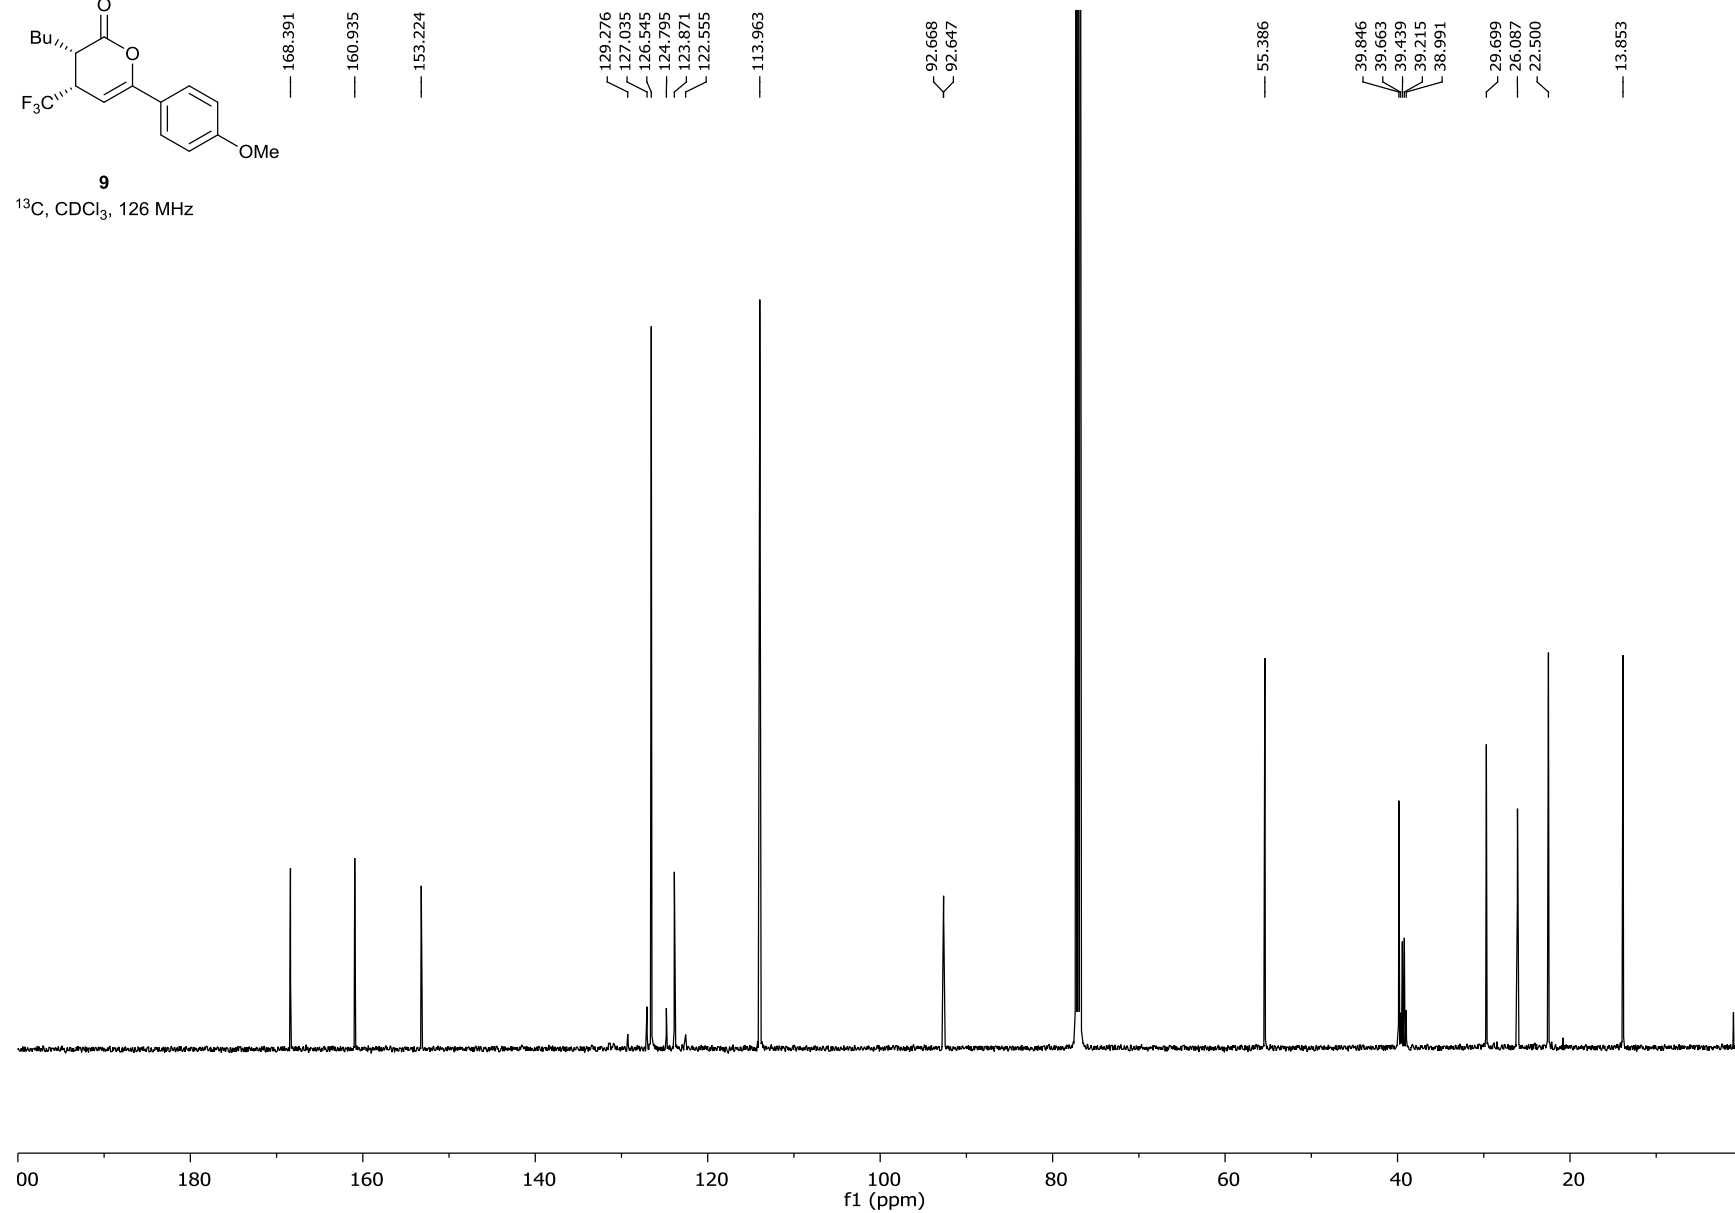

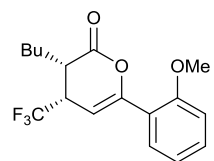

**10**

$^1\text{H}$ ,  $\text{CDCl}_3$ , 300 MHz

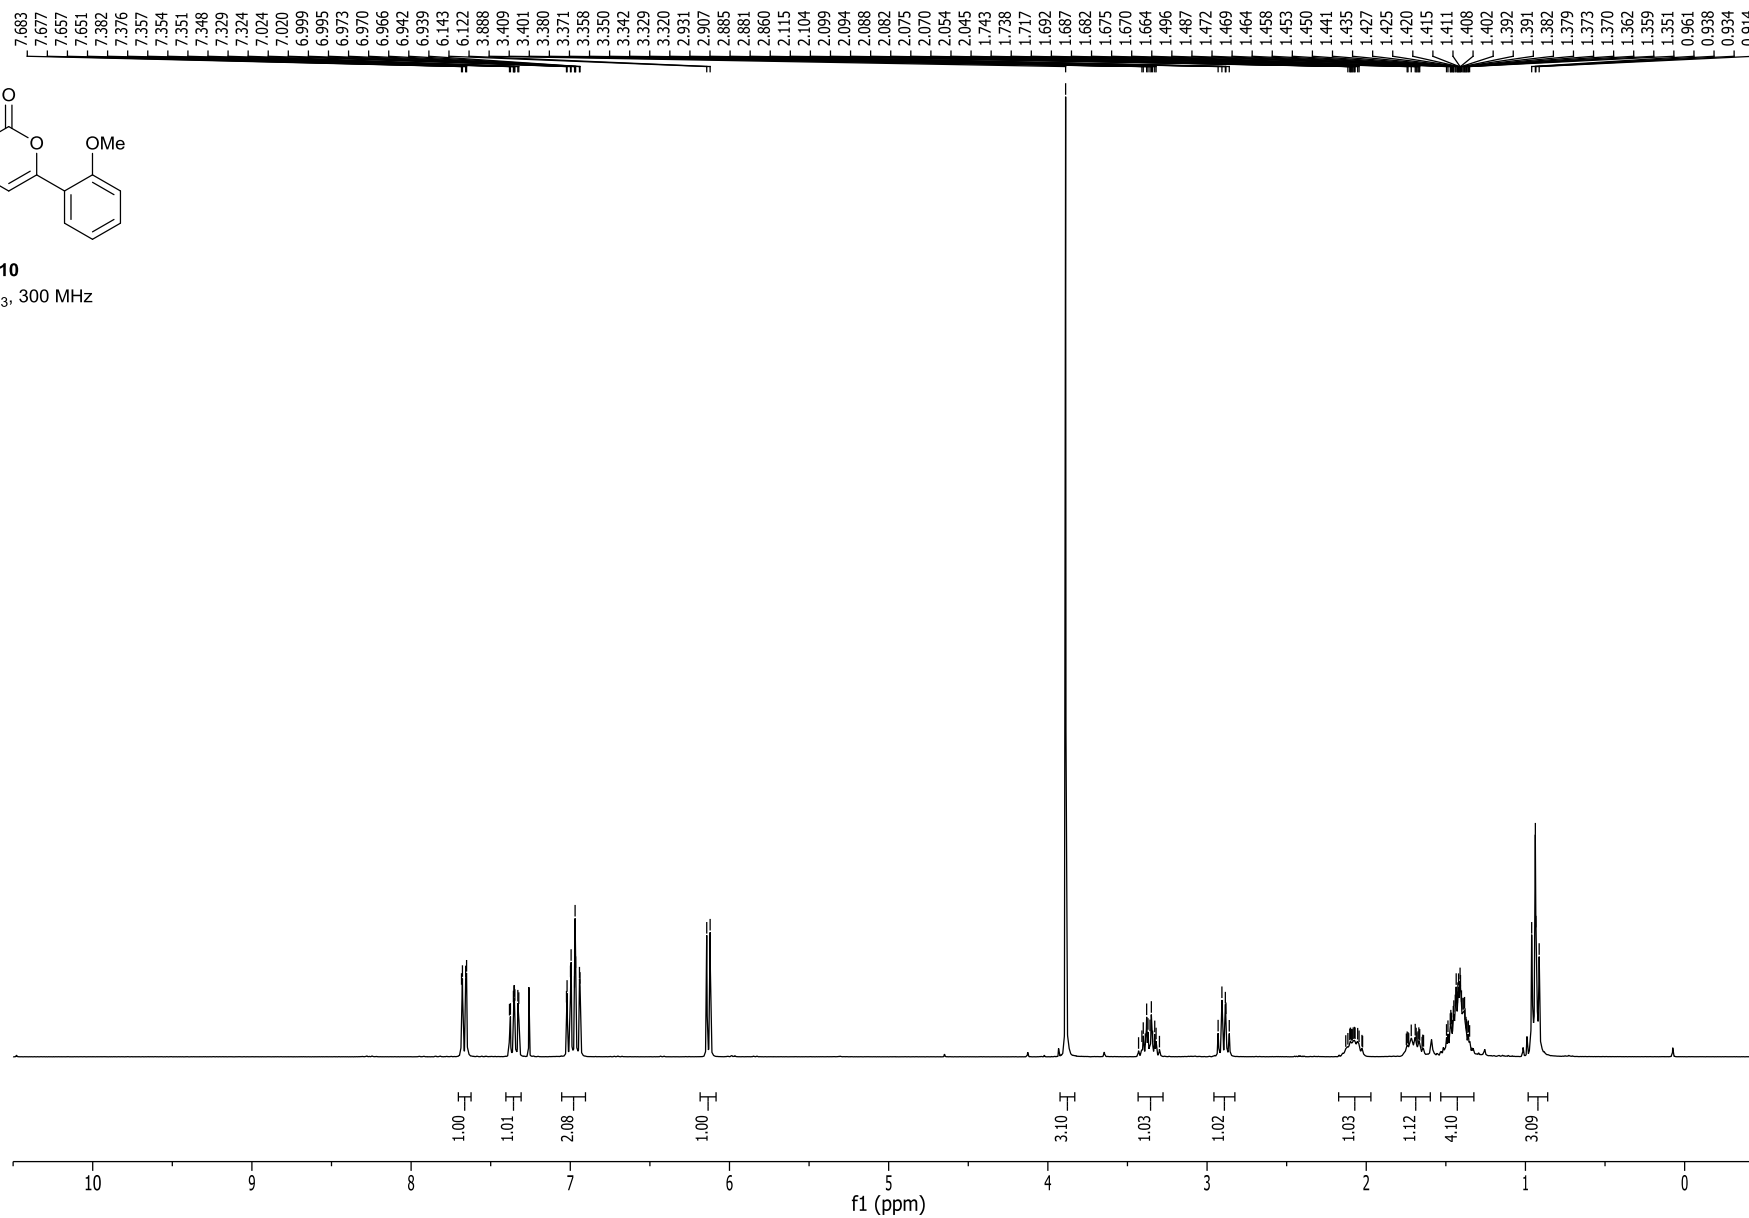

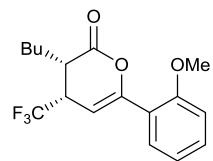

**10**

$^{13}\text{C}$ ,  $\text{CDCl}_3$ , 75 MHz

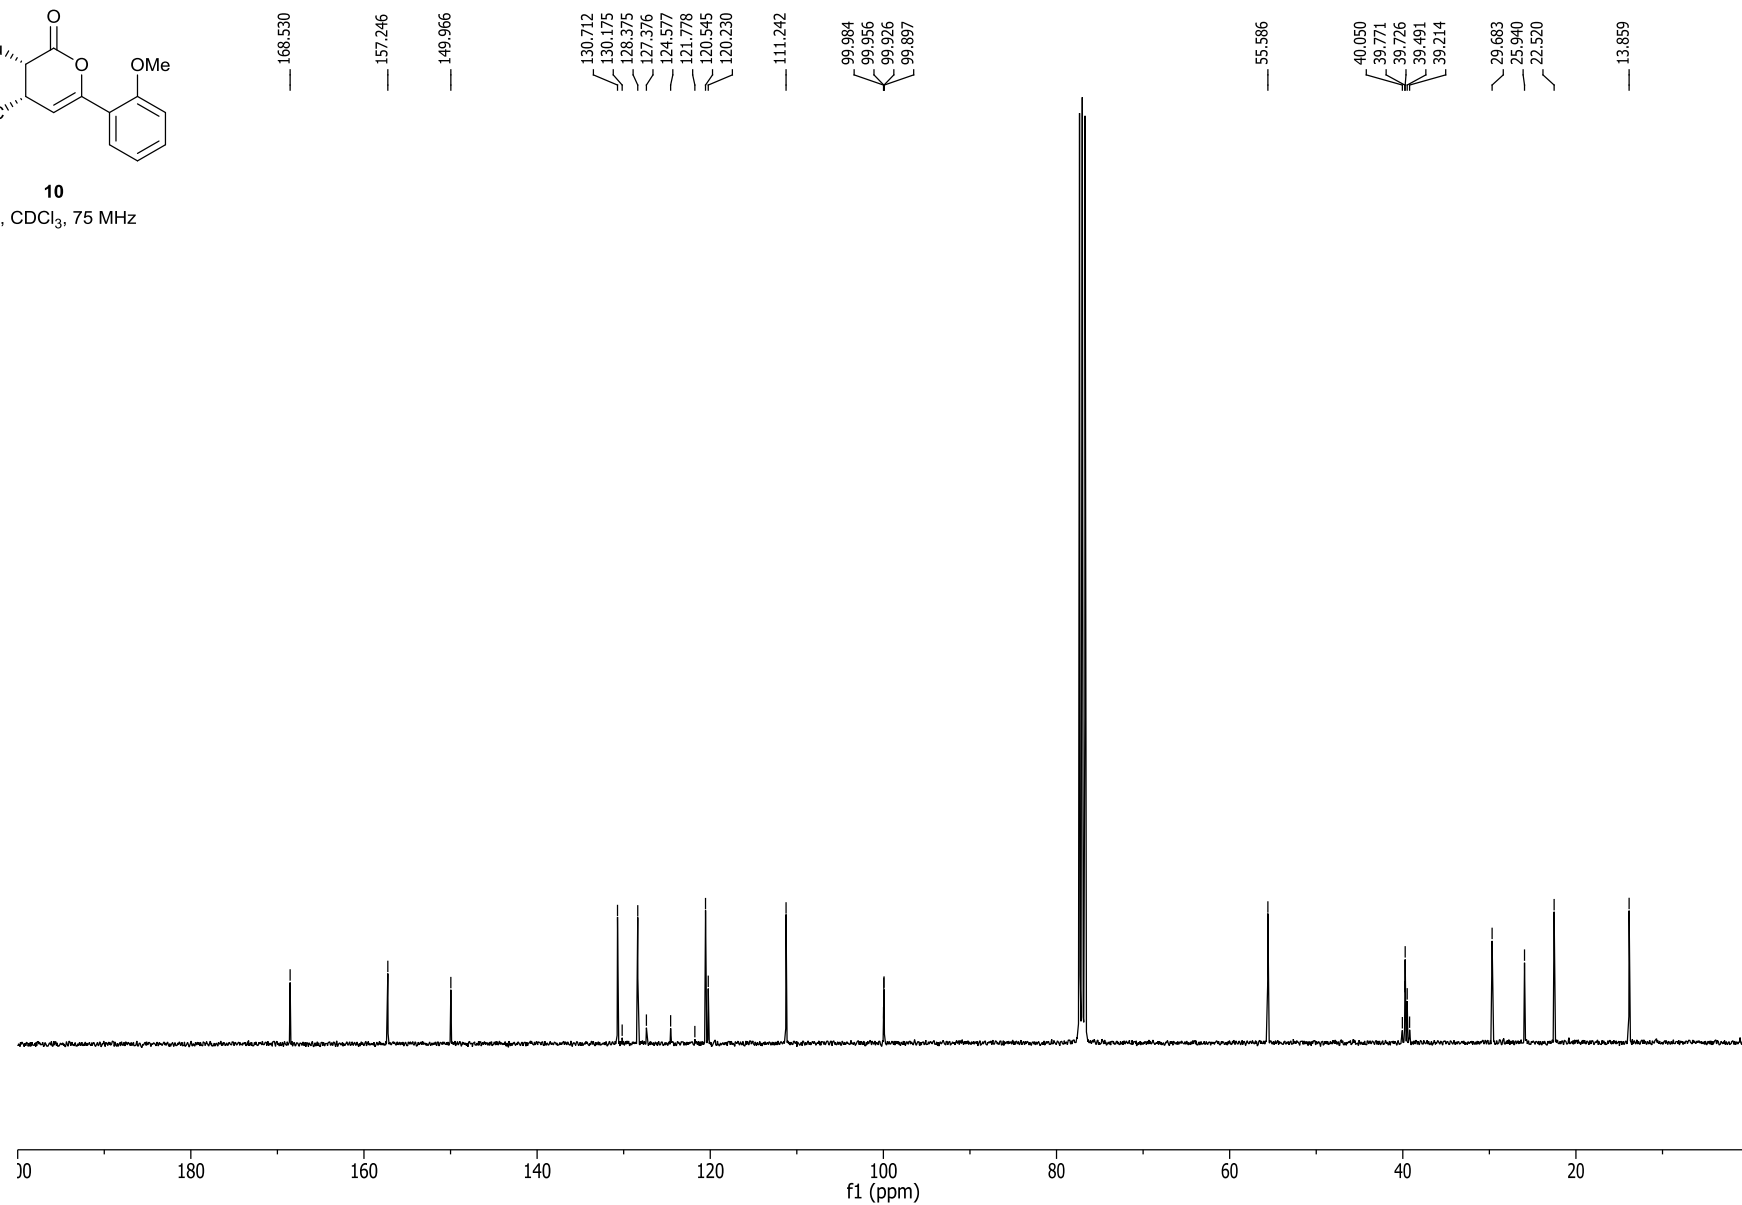

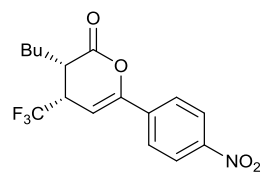

**11**

<sup>1</sup>H, CDCl<sub>3</sub>, 300 MHz

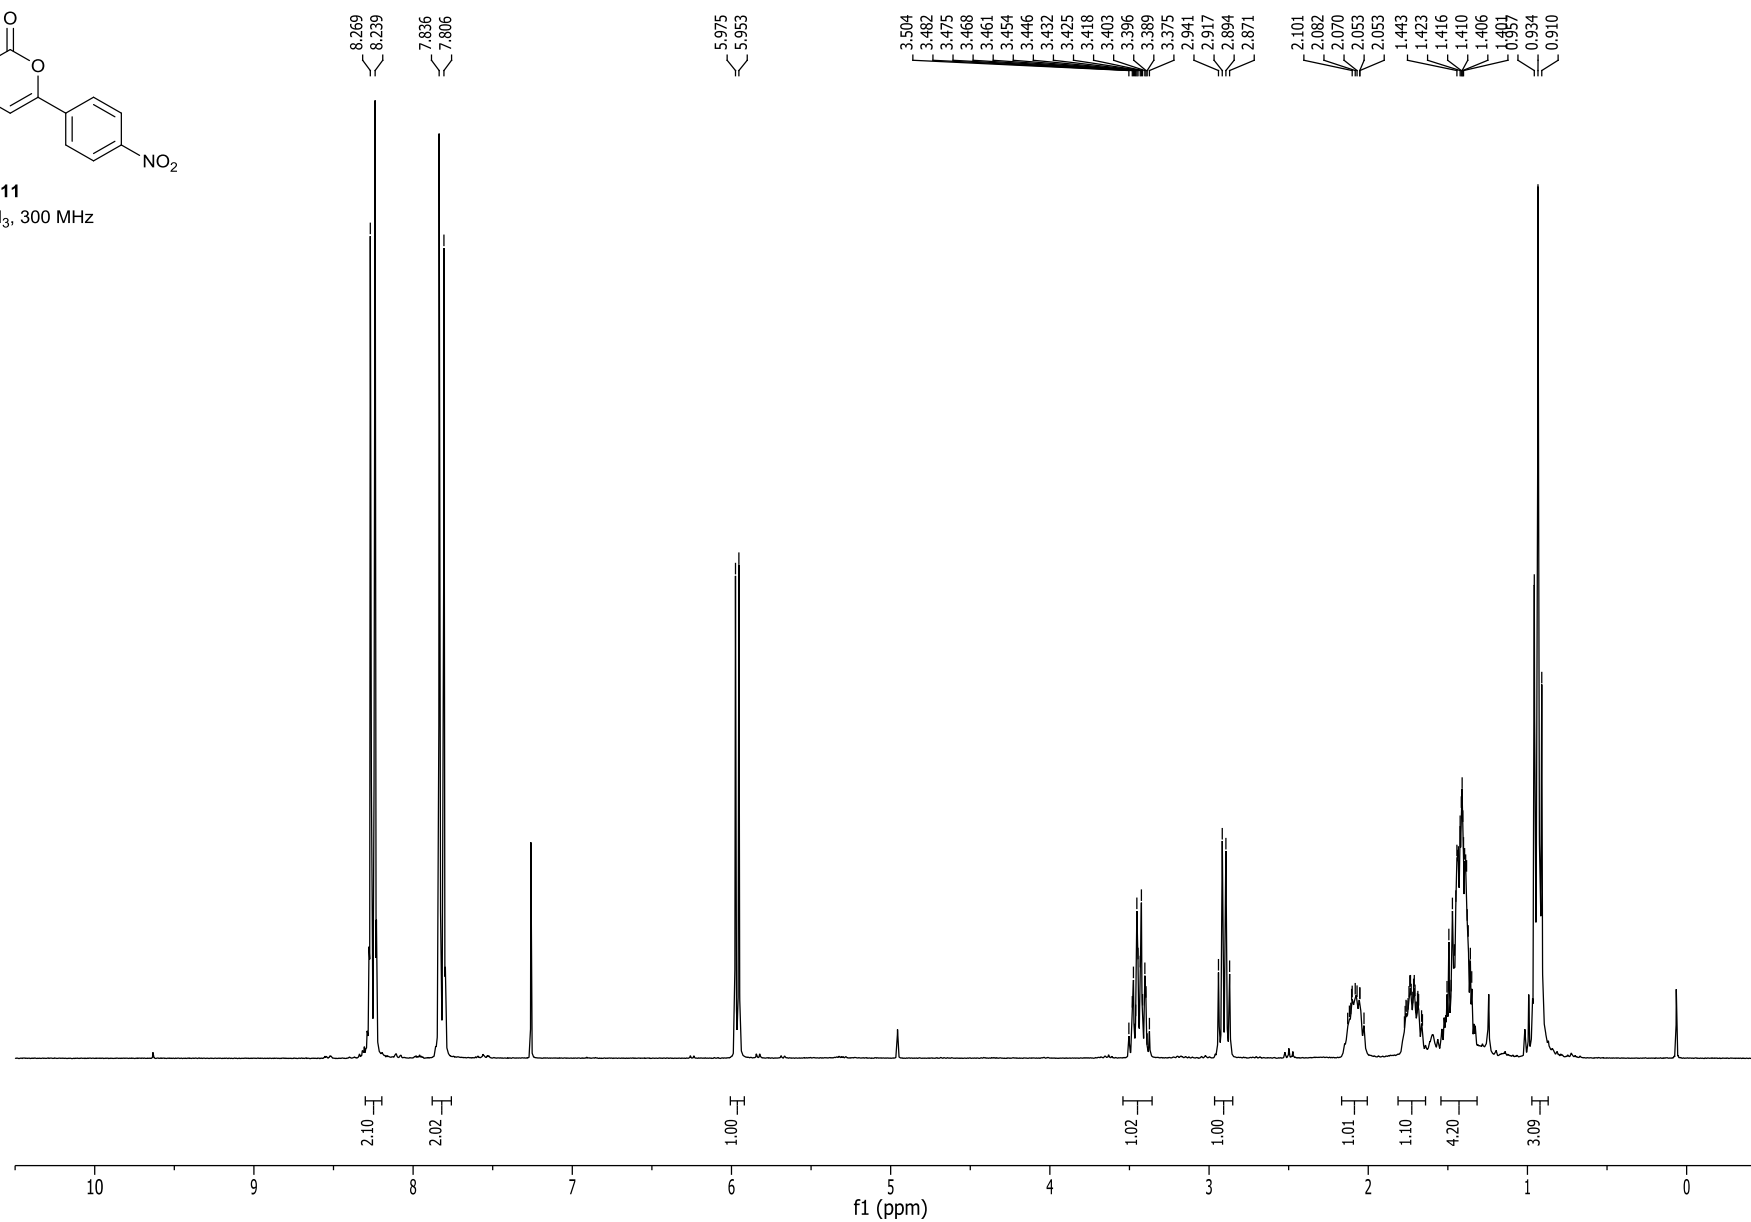

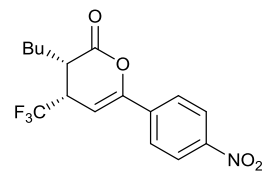

**11**

$^{13}\text{C}$ ,  $\text{CDCl}_3$ , 75 MHz

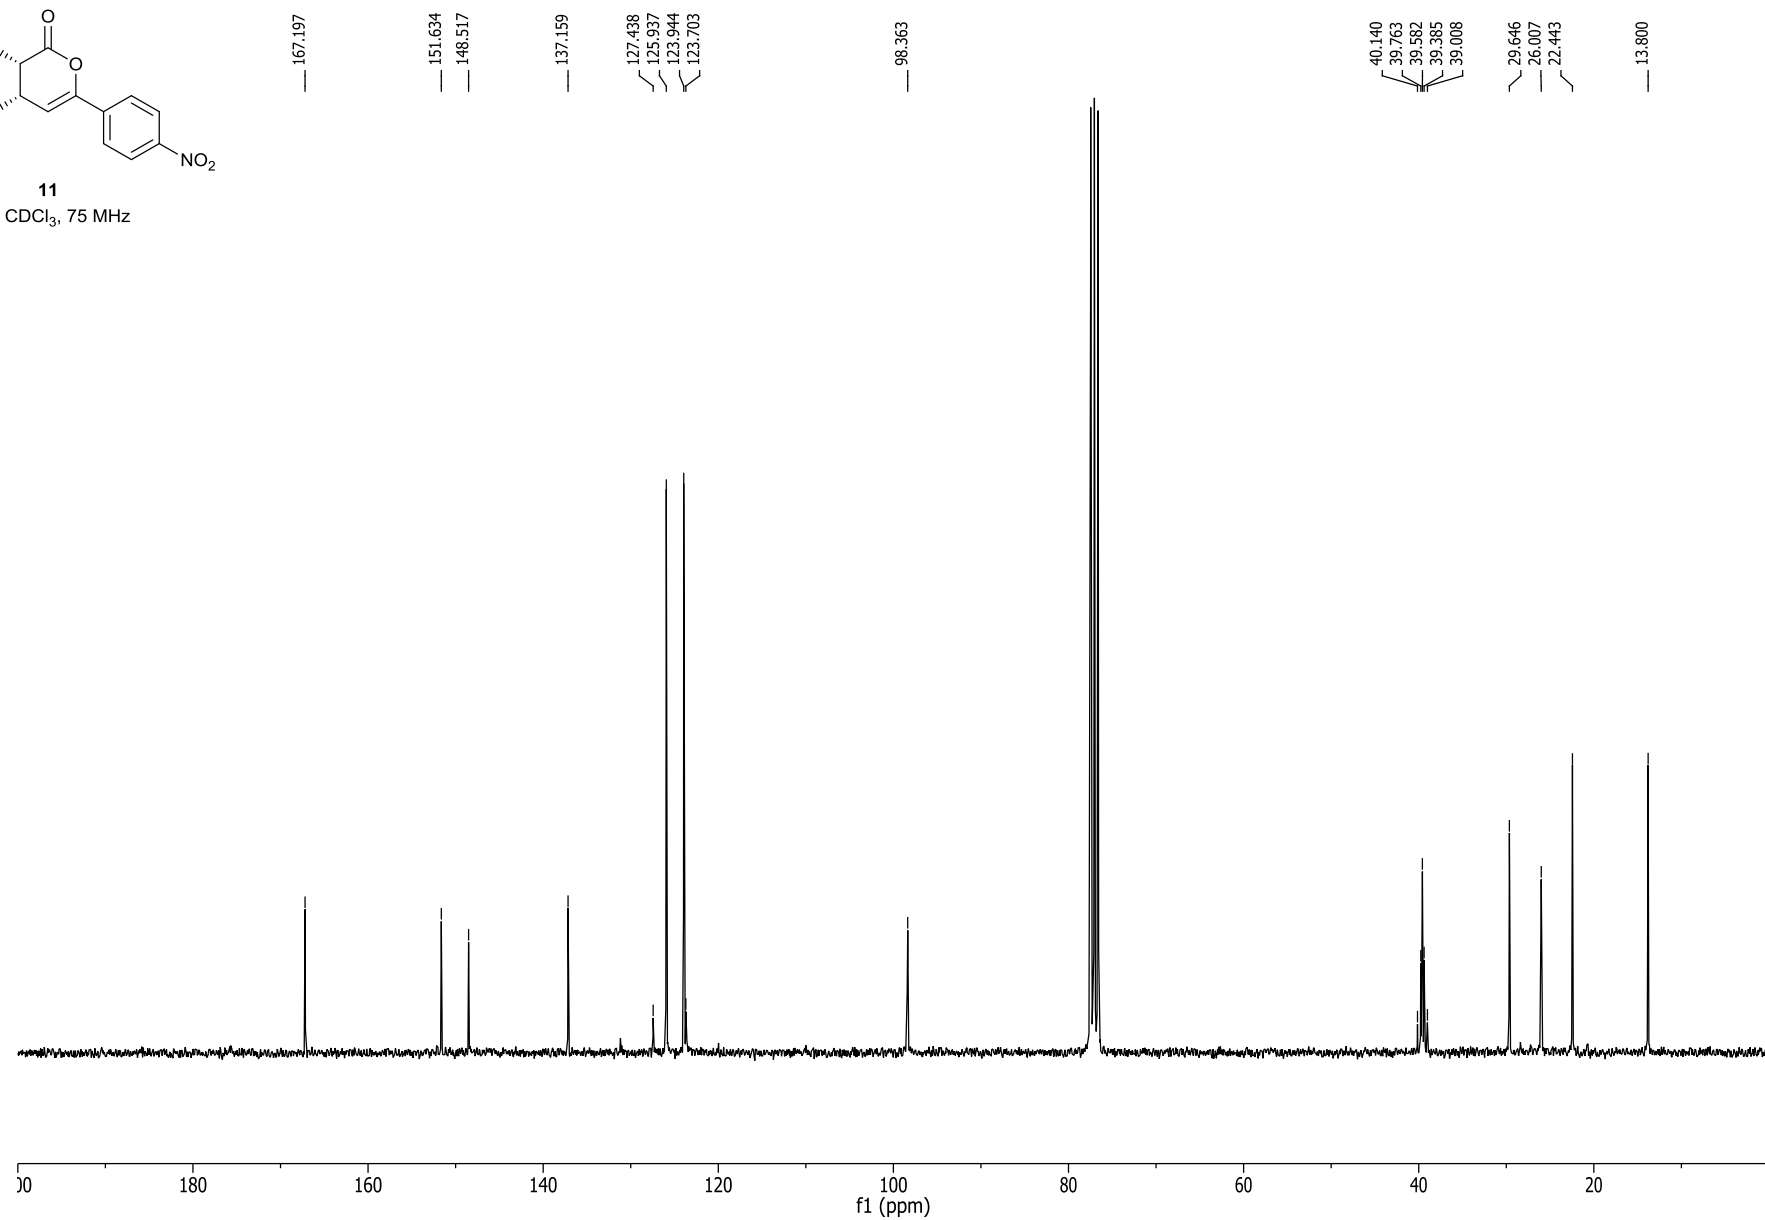

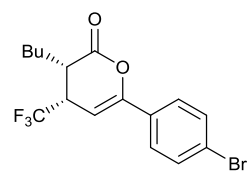

**12**

<sup>1</sup>H, CDCl<sub>3</sub>, 400 MHz

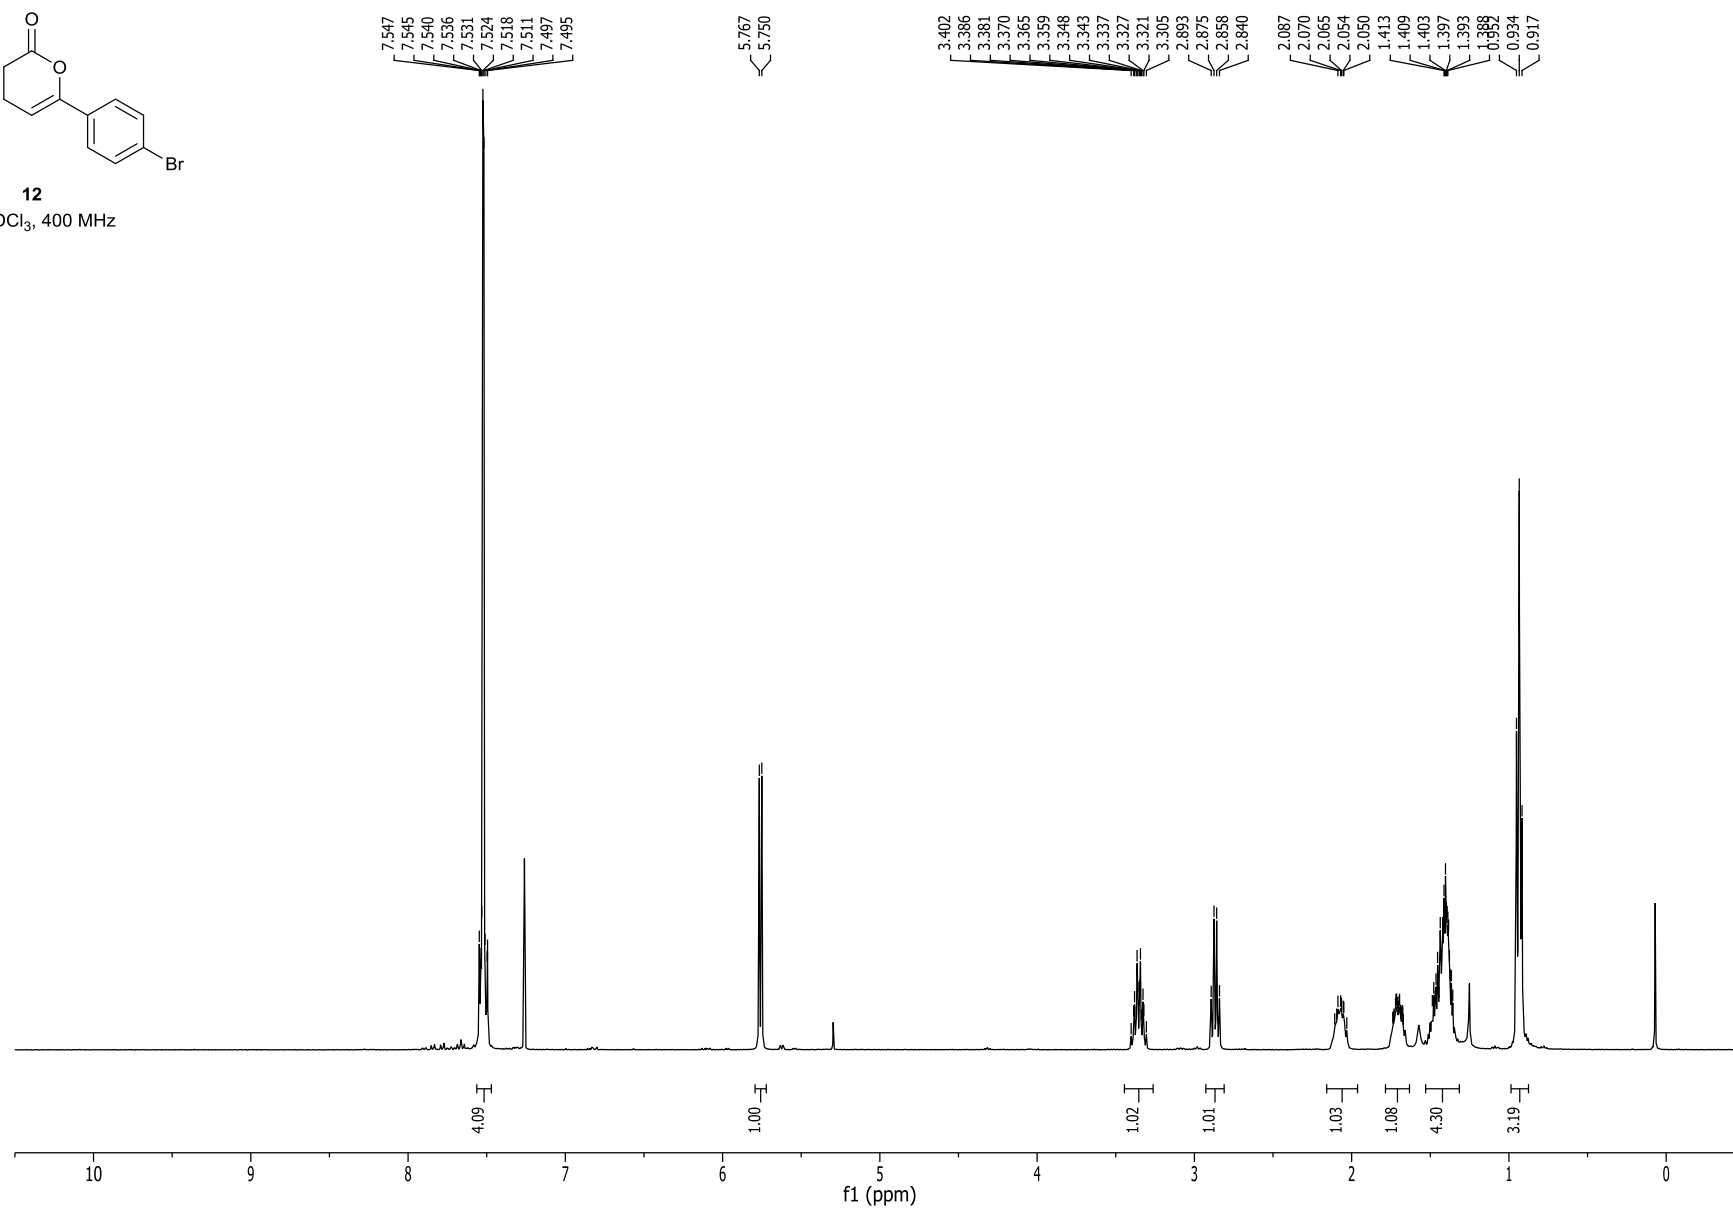



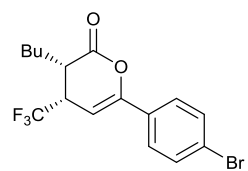

**12**

$^{13}\text{C}$ ,  $\text{CDCl}_3$ , 101 MHz

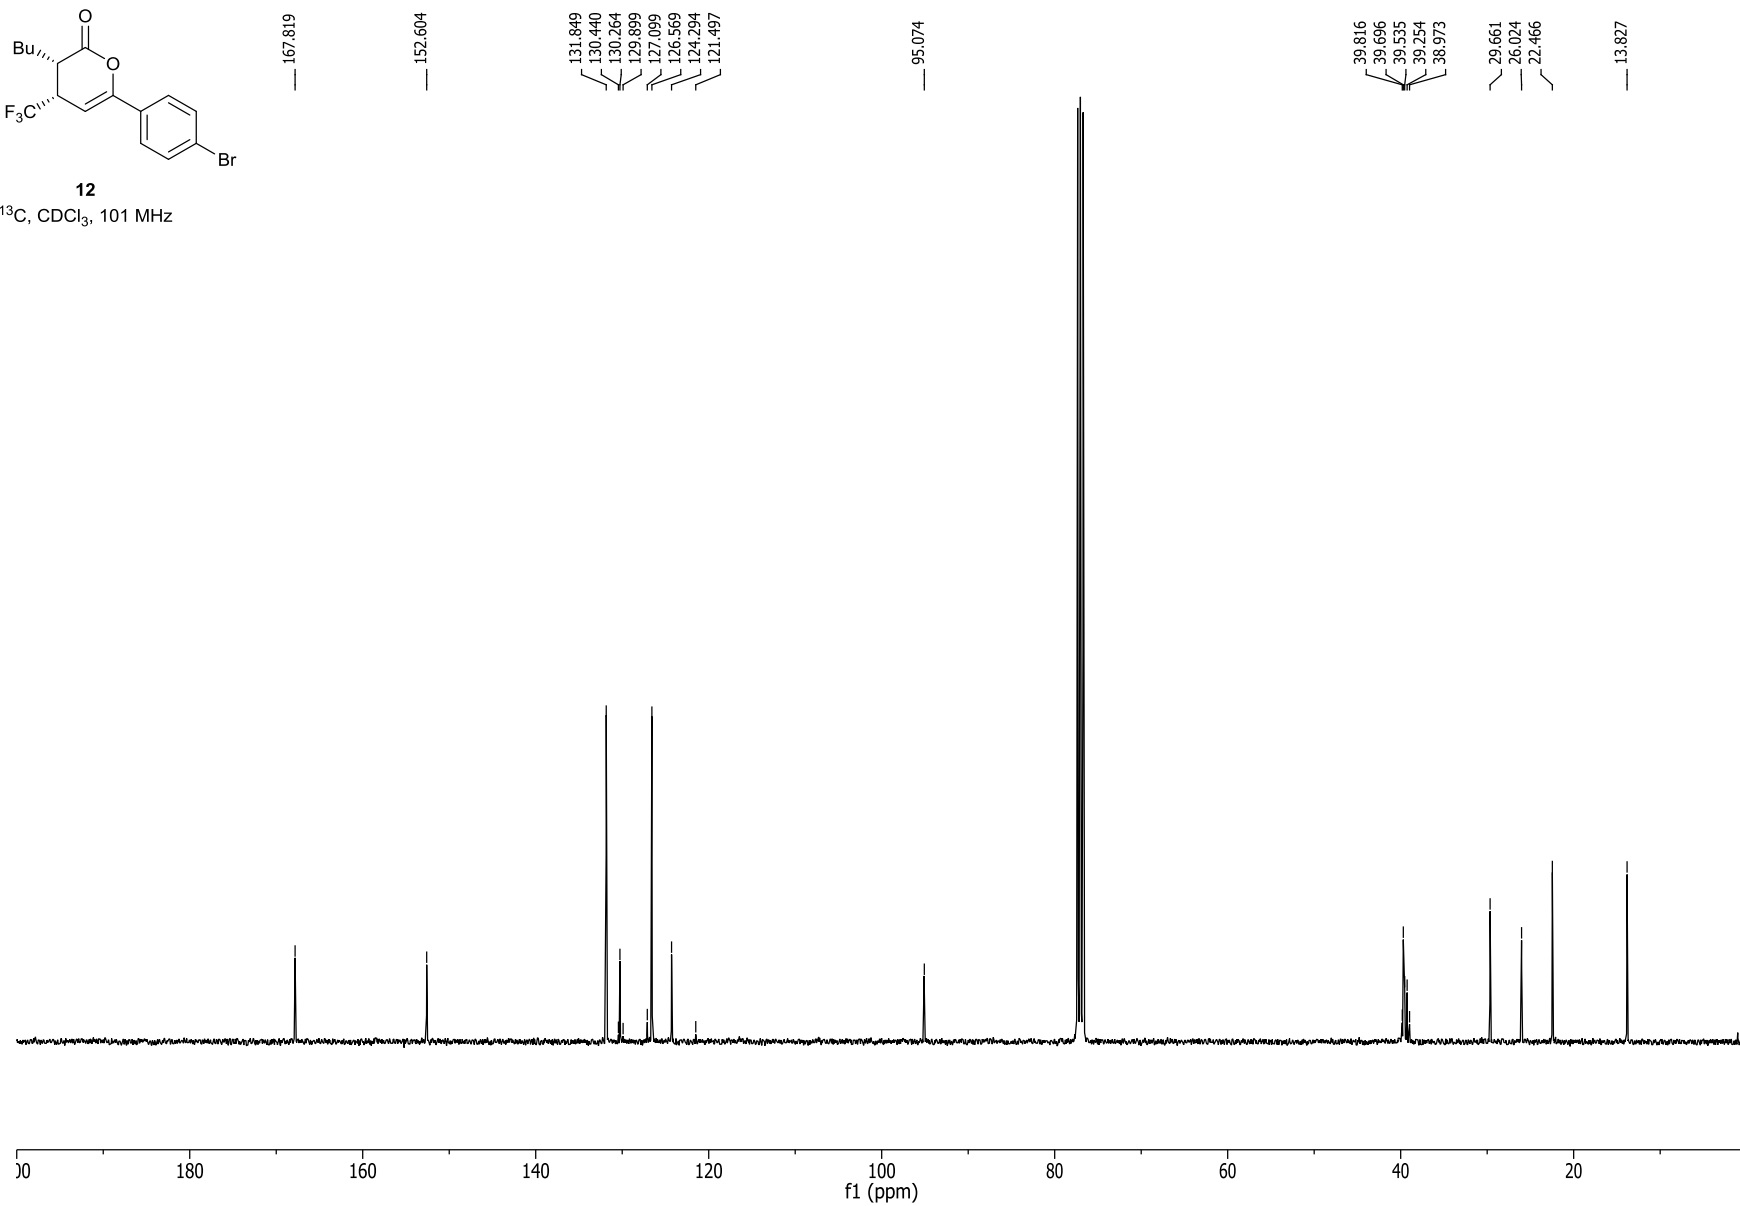

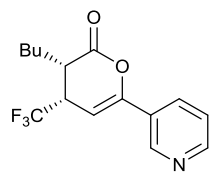

**13**

$^1\text{H}$ ,  $\text{CDCl}_3$ , 500 MHz

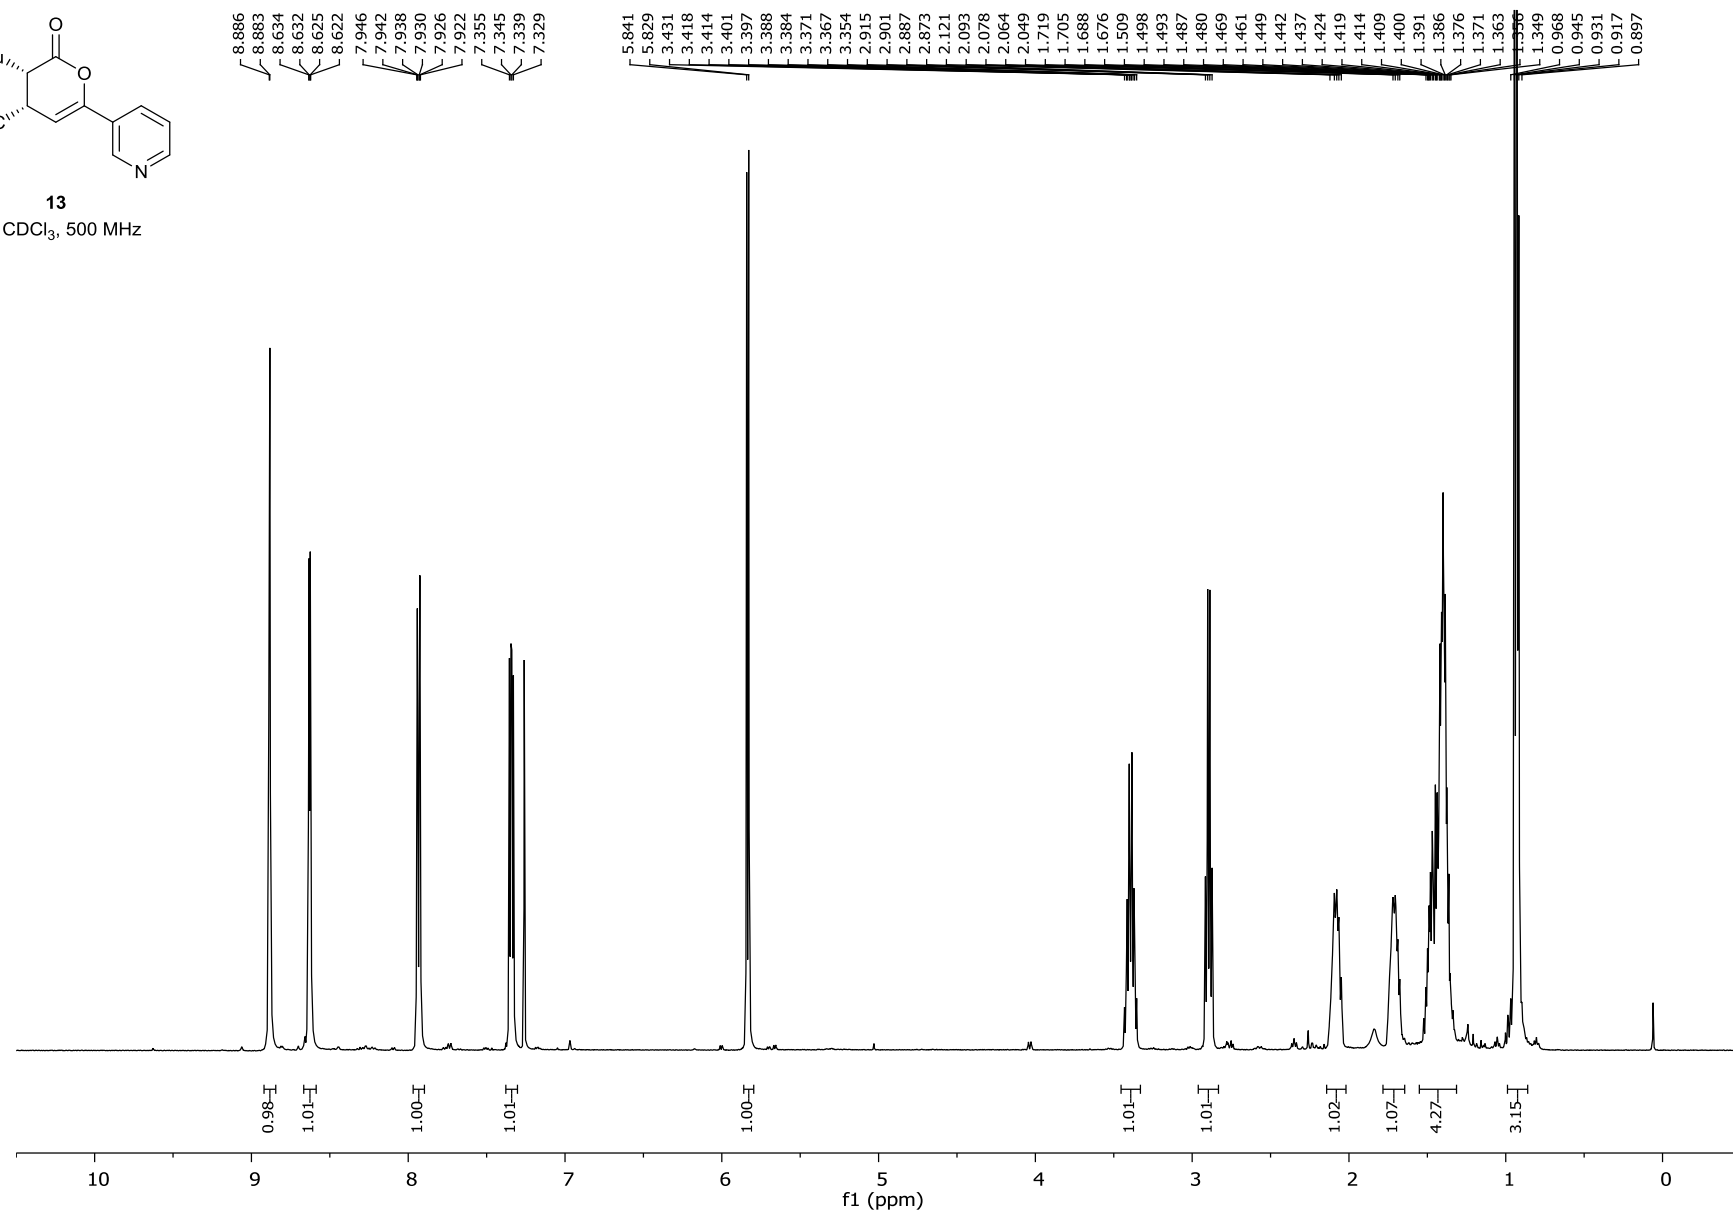

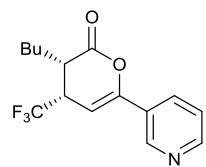

**13**

$^{13}\text{C}$ ,  $\text{CDCl}_3$ , 126 MHz

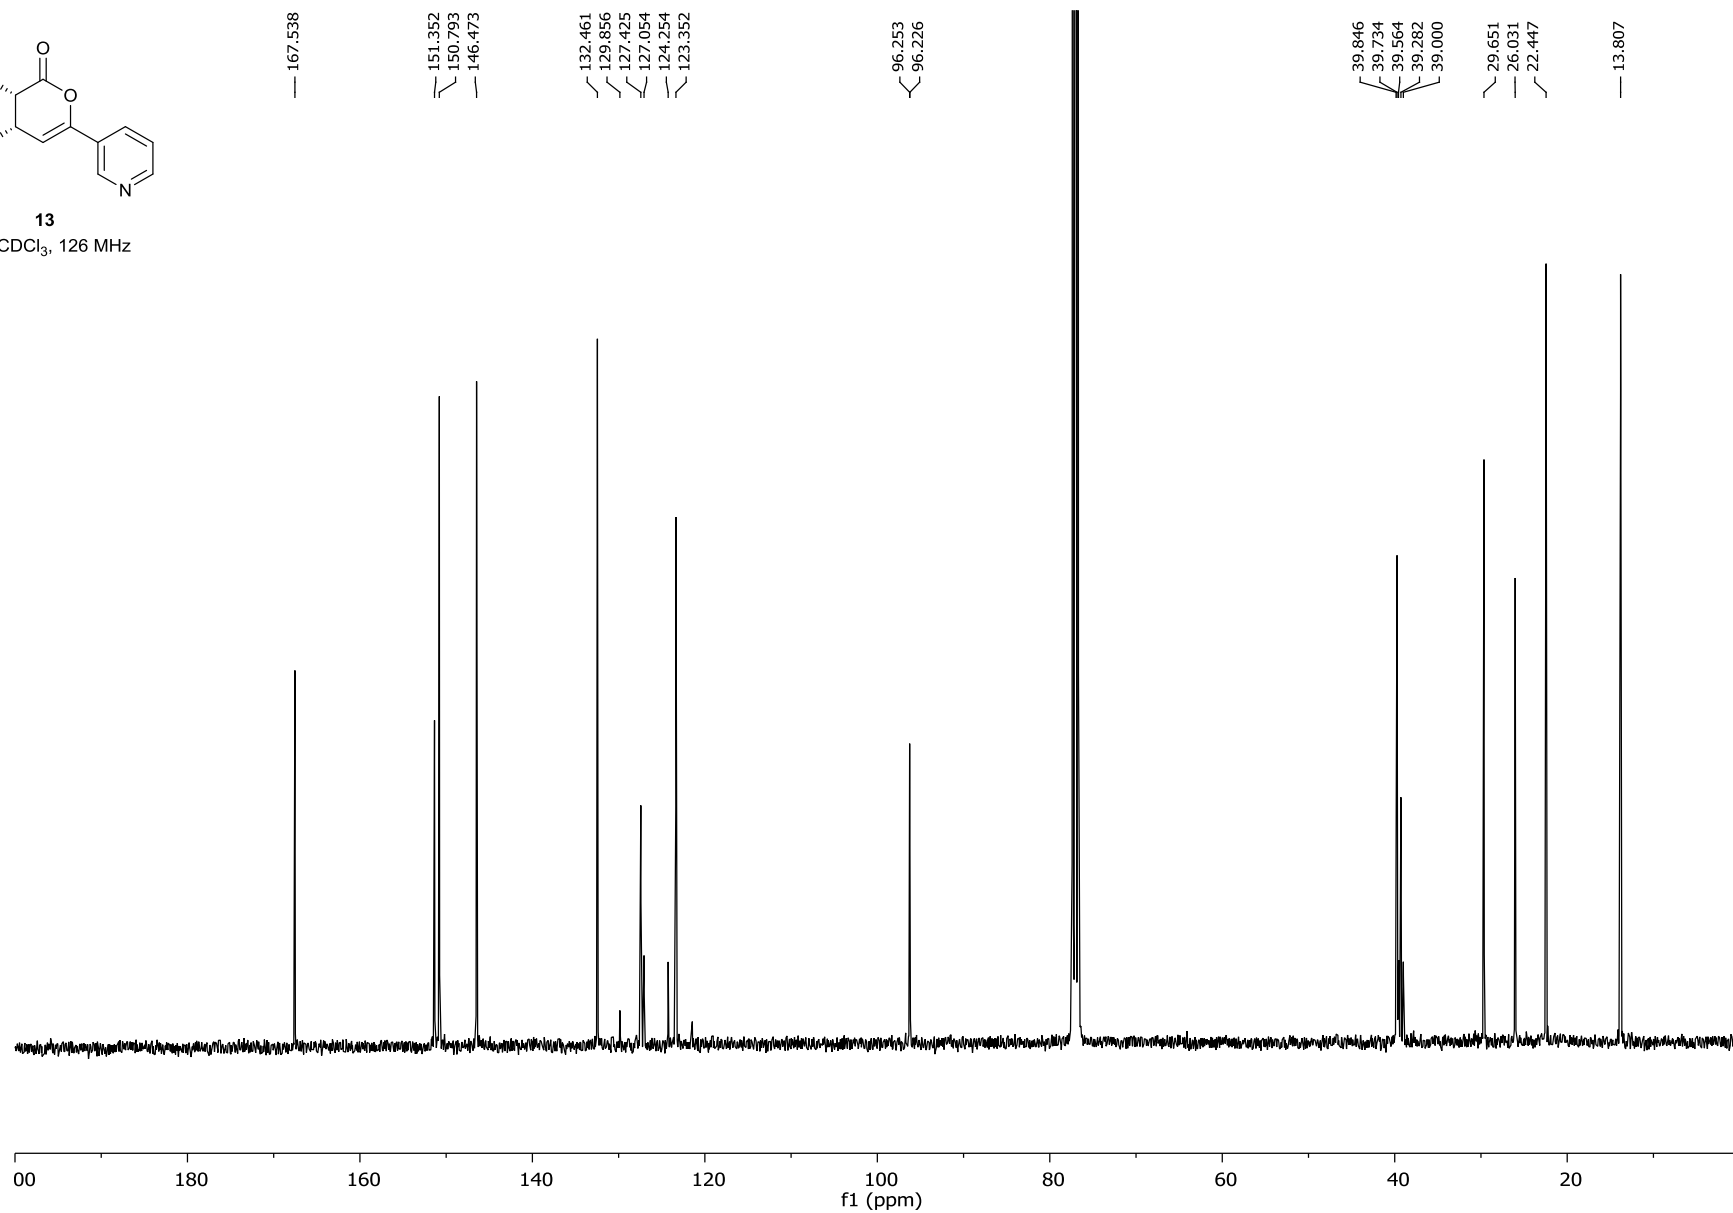

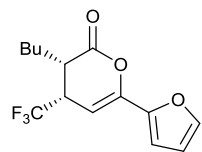

**14**

$^1\text{H}$ ,  $\text{CDCl}_3$ , 300 MHz

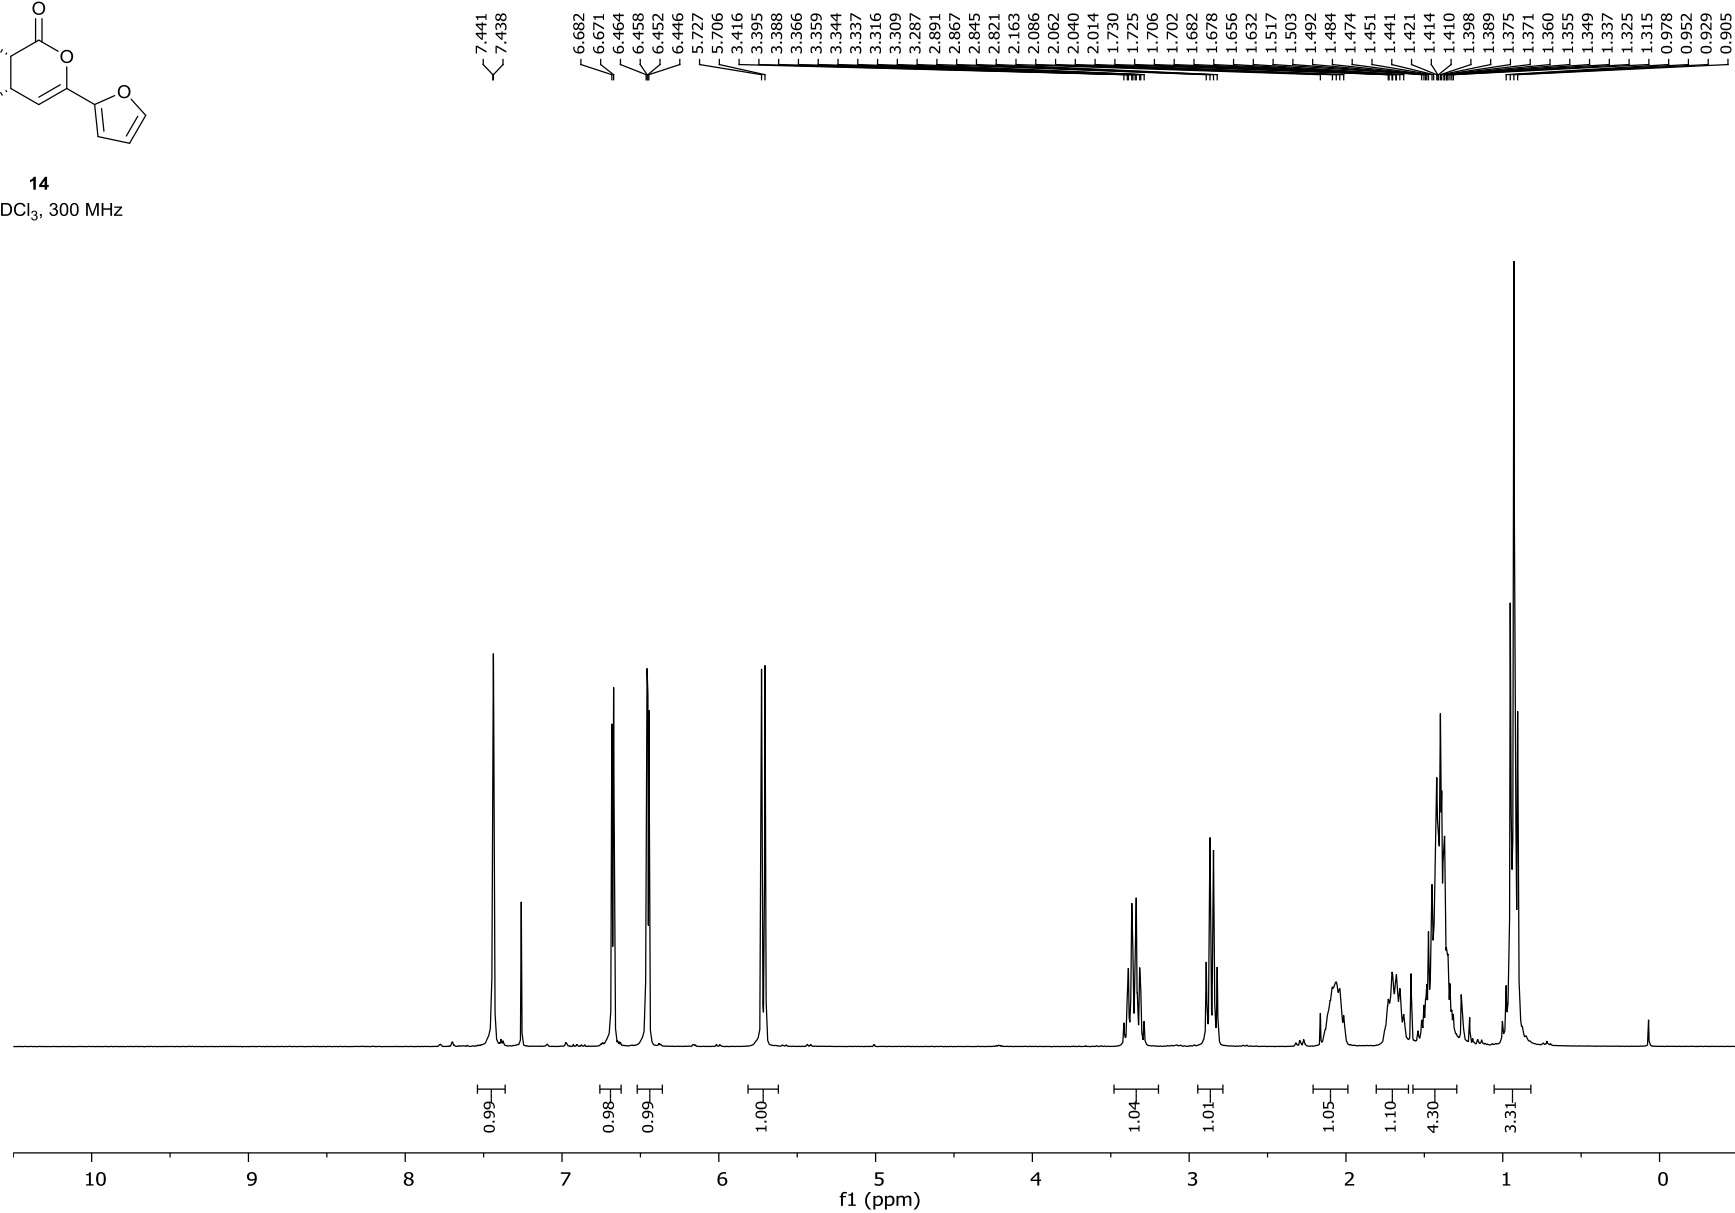

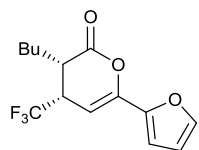

**14**  
 $^{13}\text{C}$ ,  $\text{CDCl}_3$ , 75 MHz

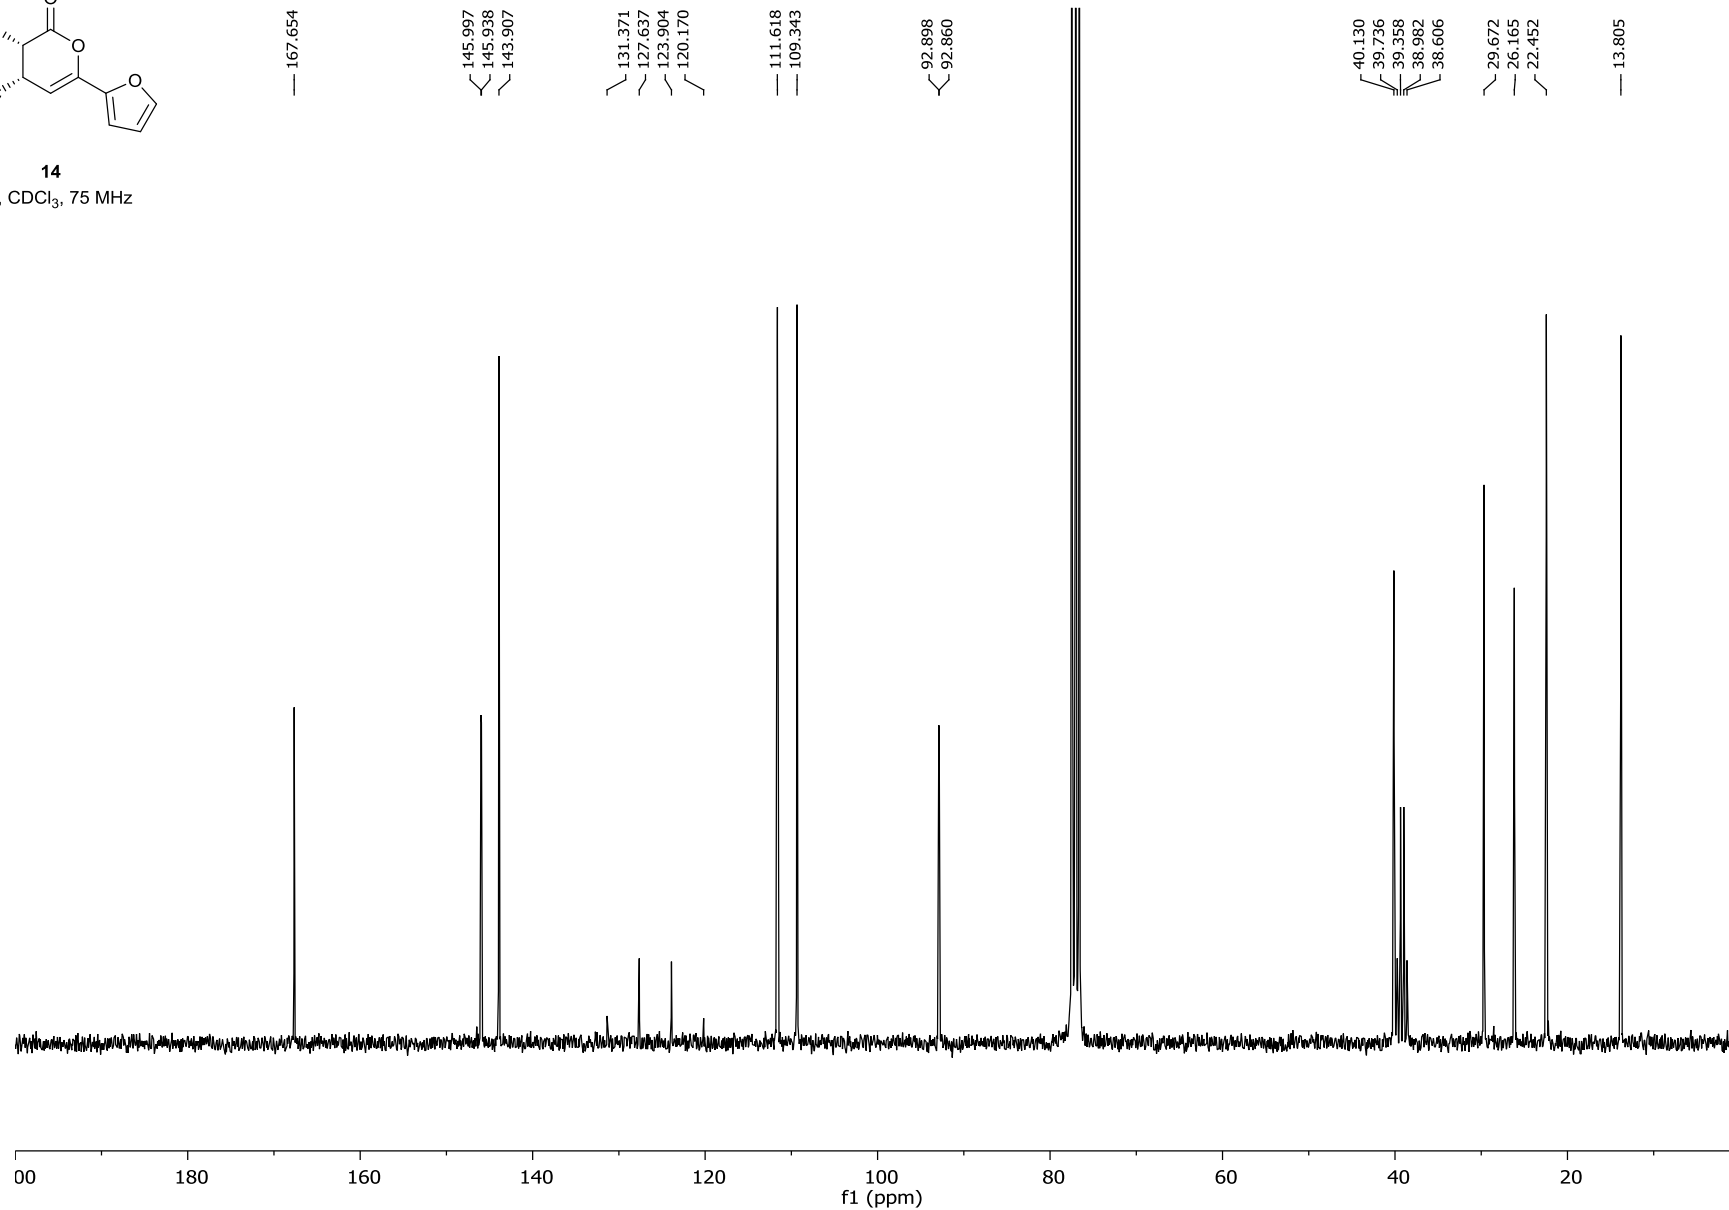

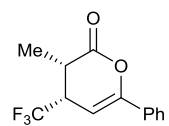

**15**

<sup>1</sup>H, CDCl<sub>3</sub>, 500 MHz

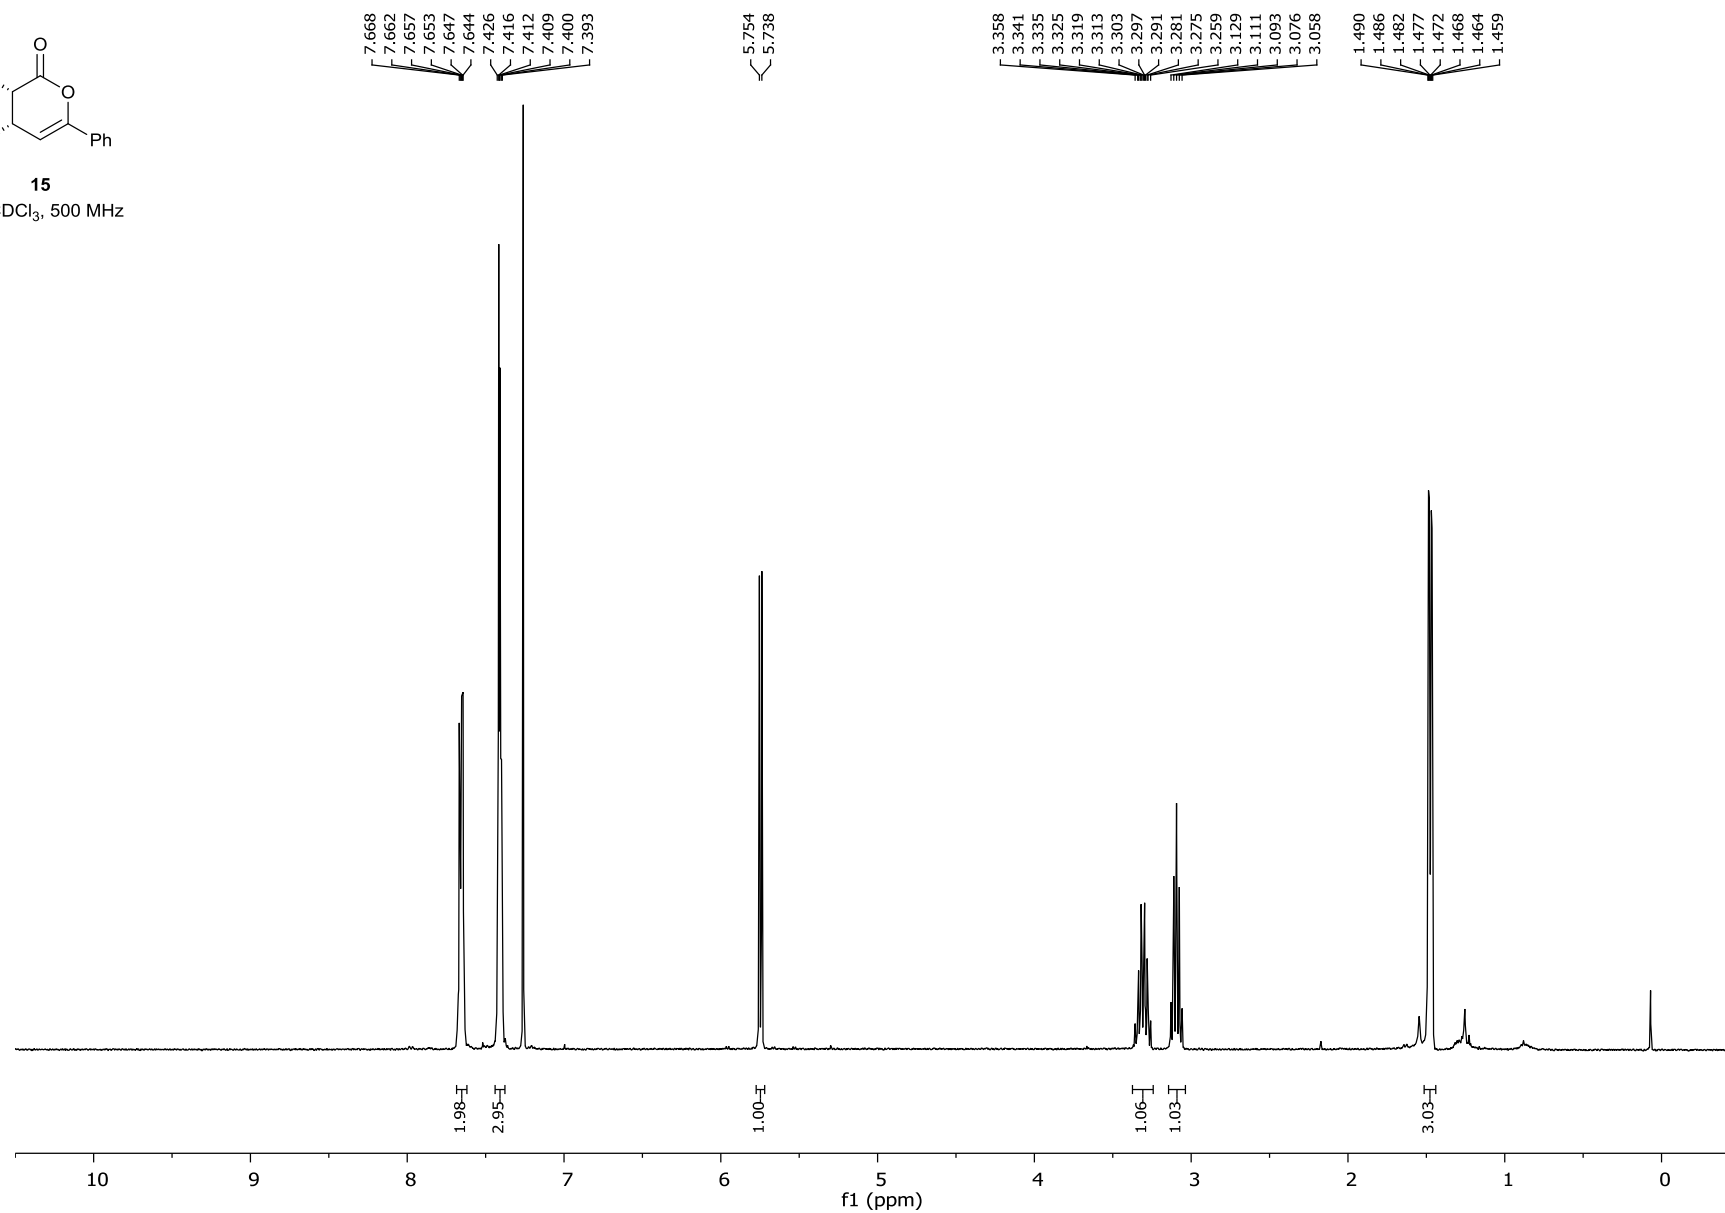

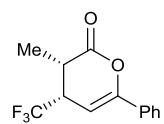

**15**

$^{13}\text{C}$ ,  $\text{CDCl}_3$ , 75 MHz

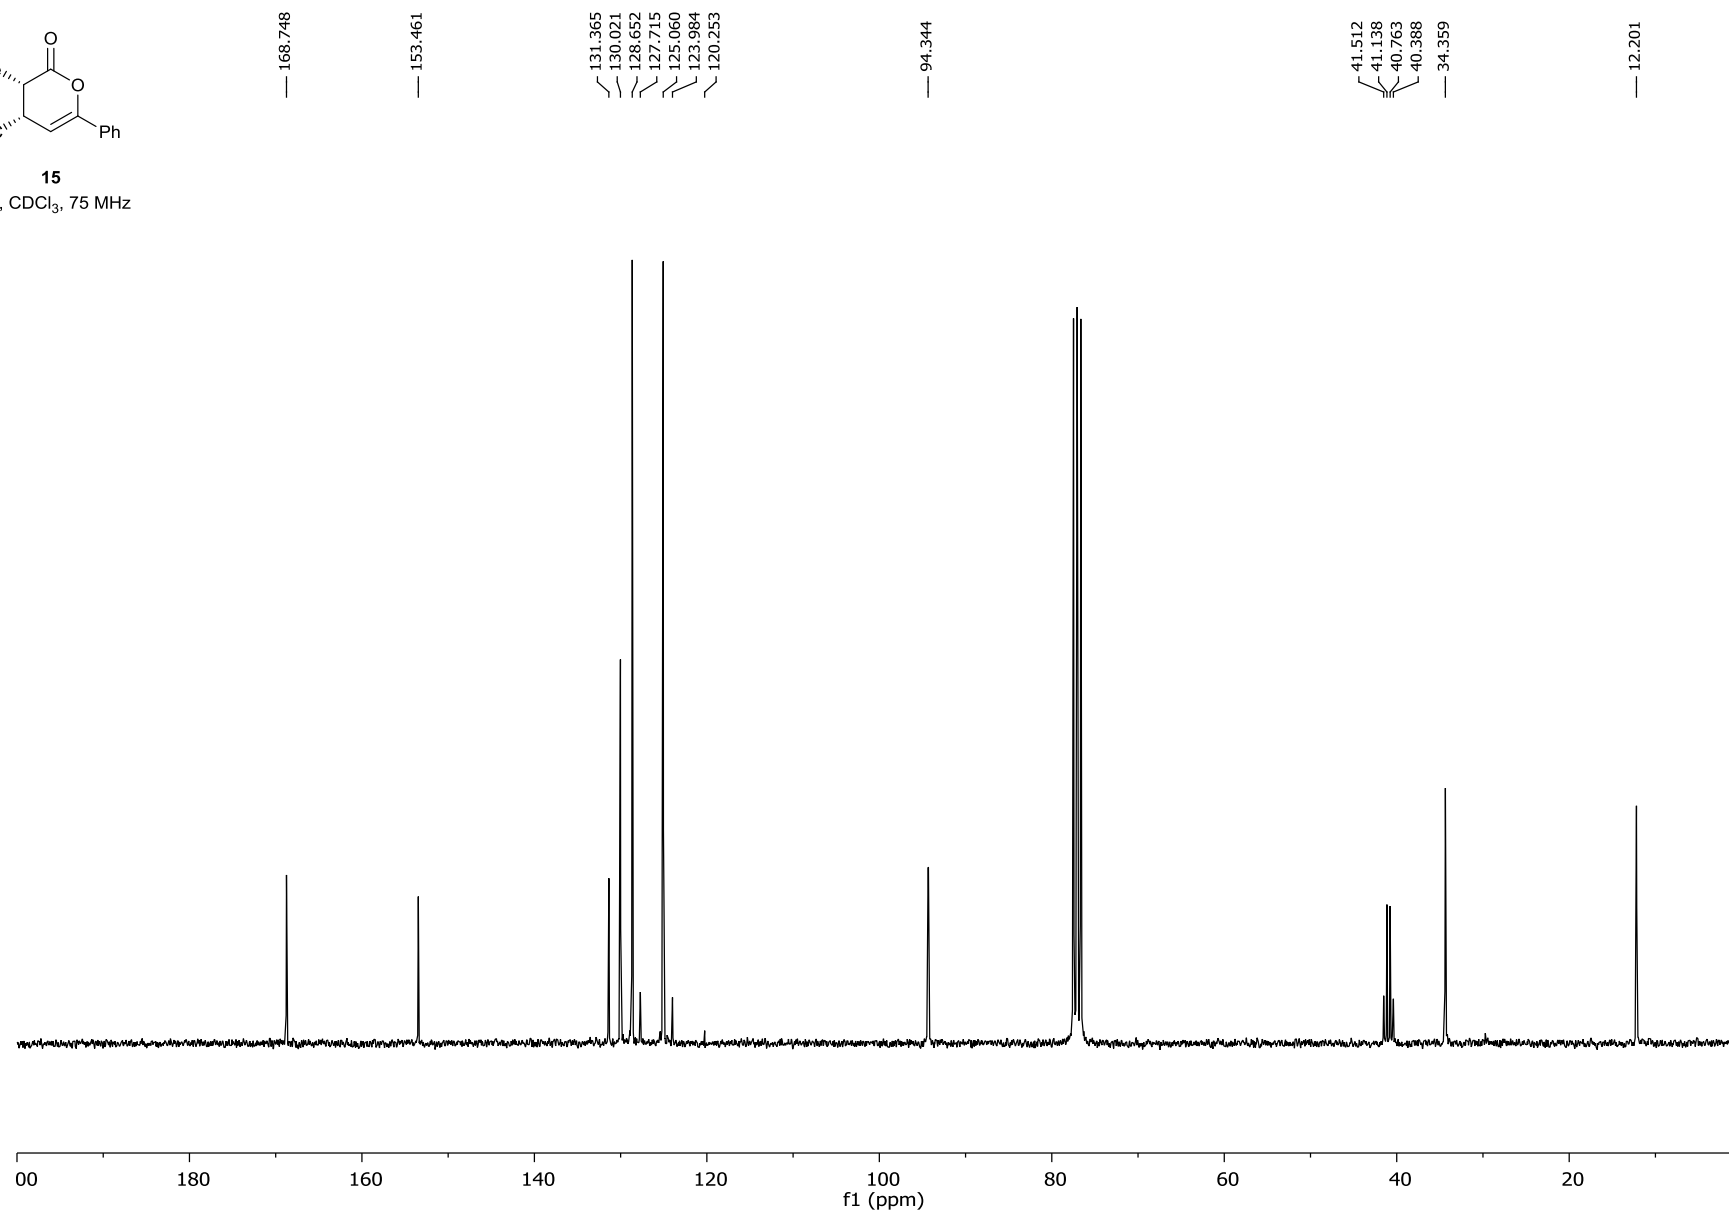

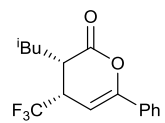

**16**

<sup>1</sup>H, CDCl<sub>3</sub>, 500 MHz

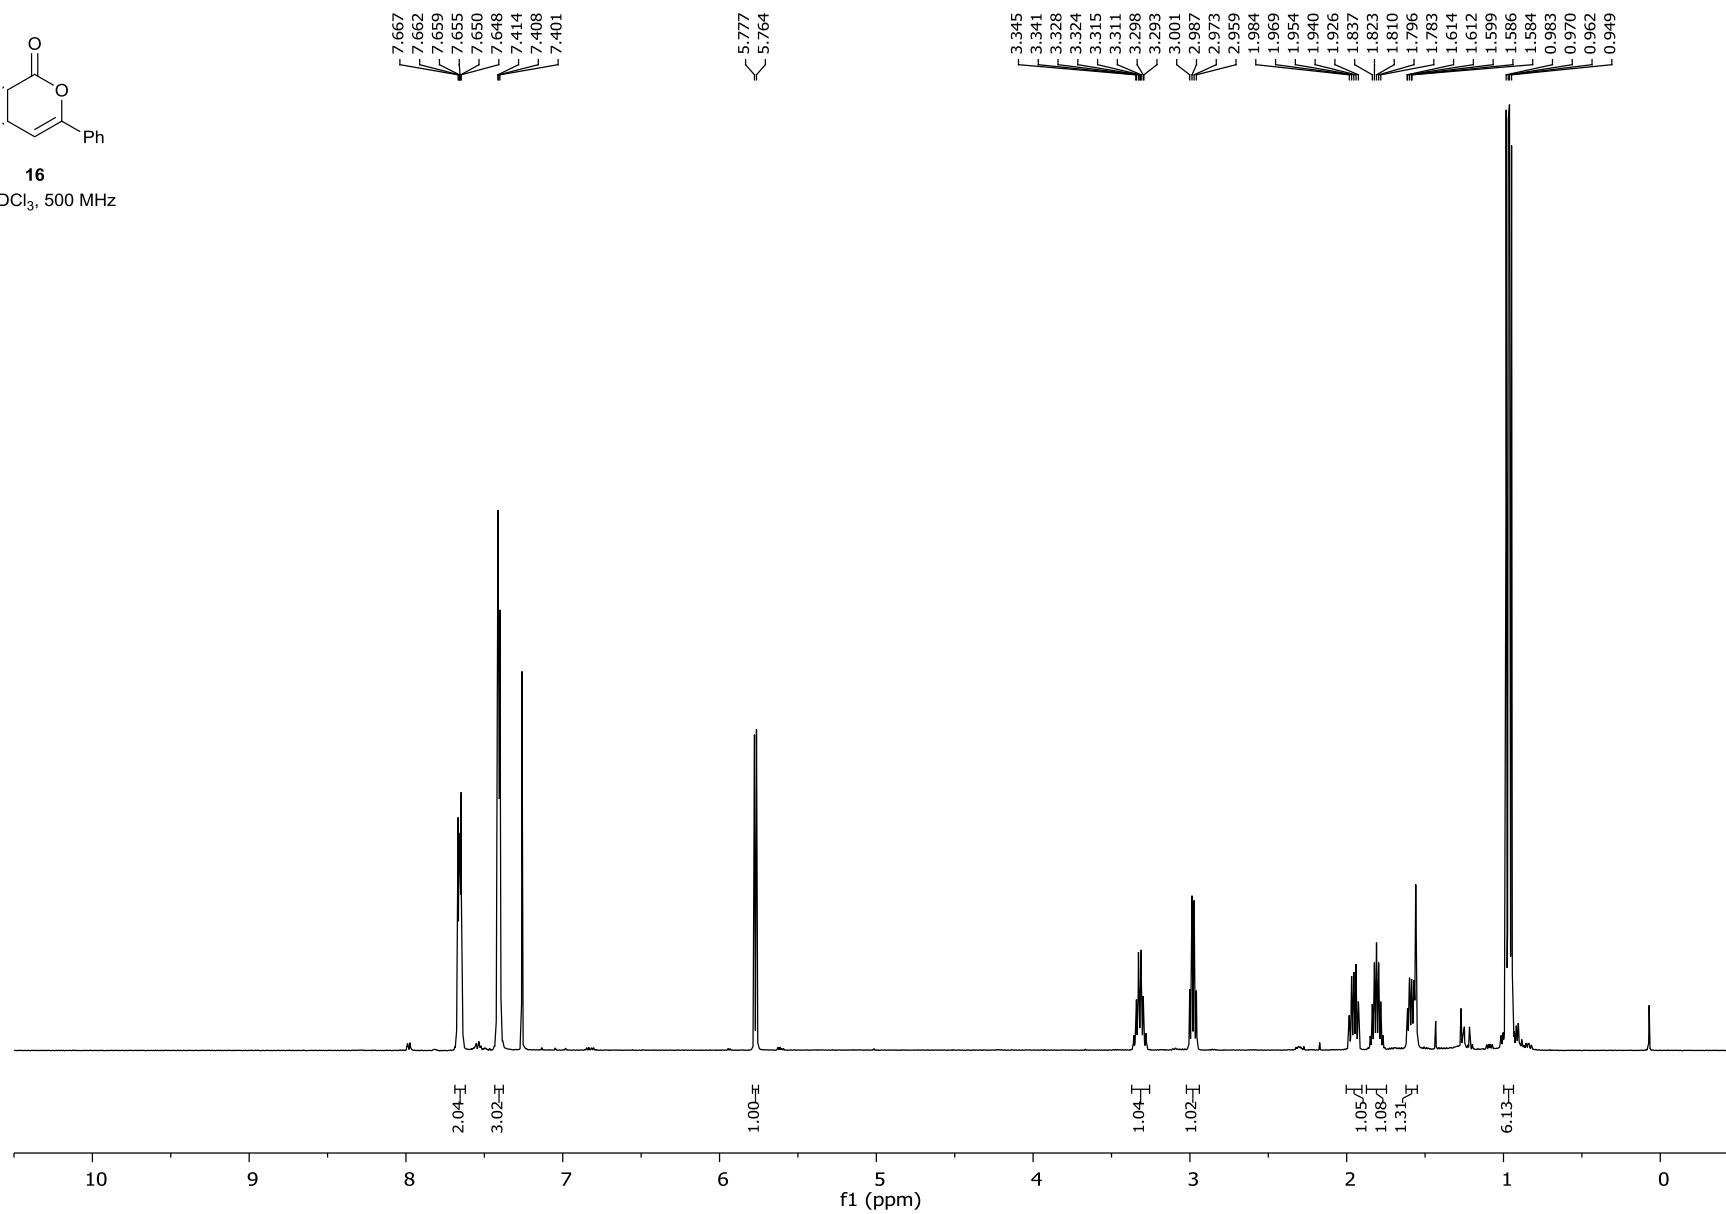



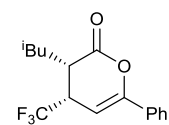

**16**

$^{13}\text{C}$ ,  $\text{CDCl}_3$ , 126 MHz

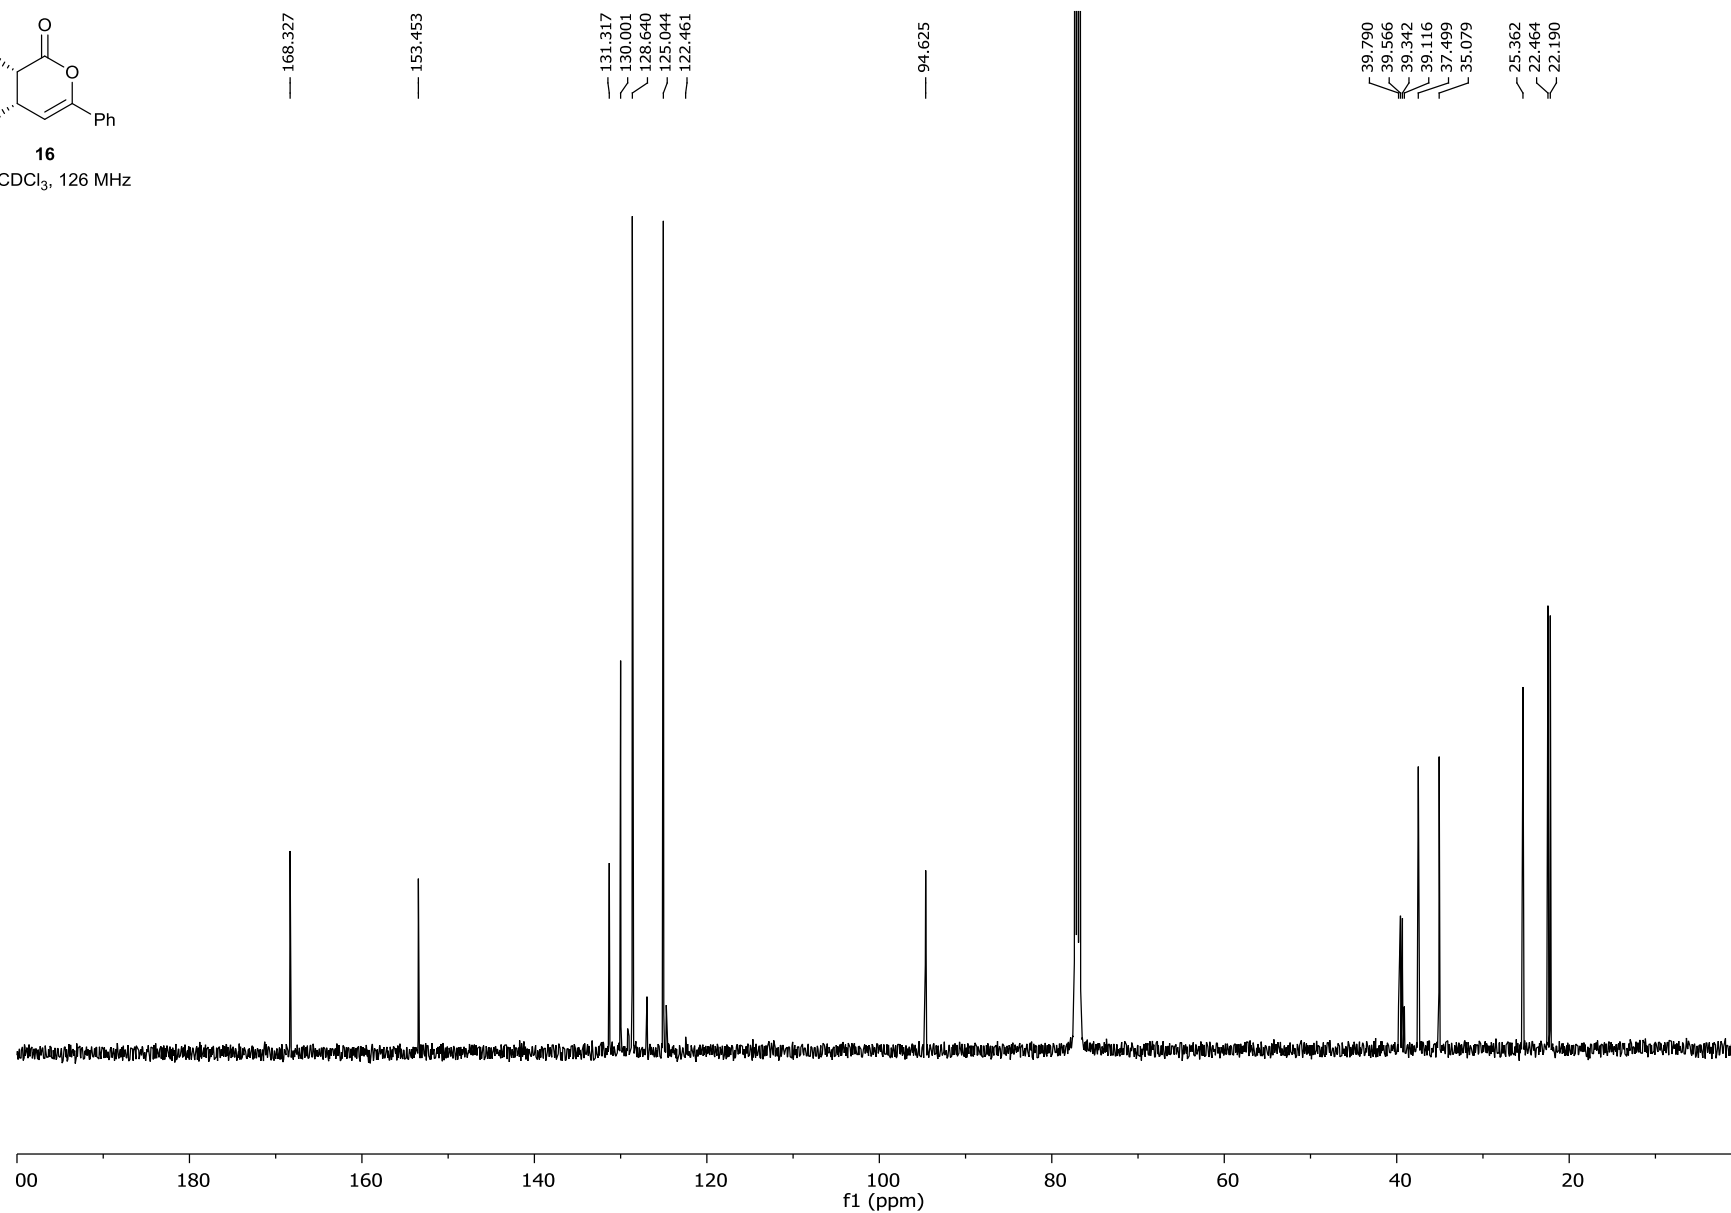

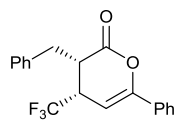

**17**

<sup>1</sup>H, CDCl<sub>3</sub>, 500 MHz

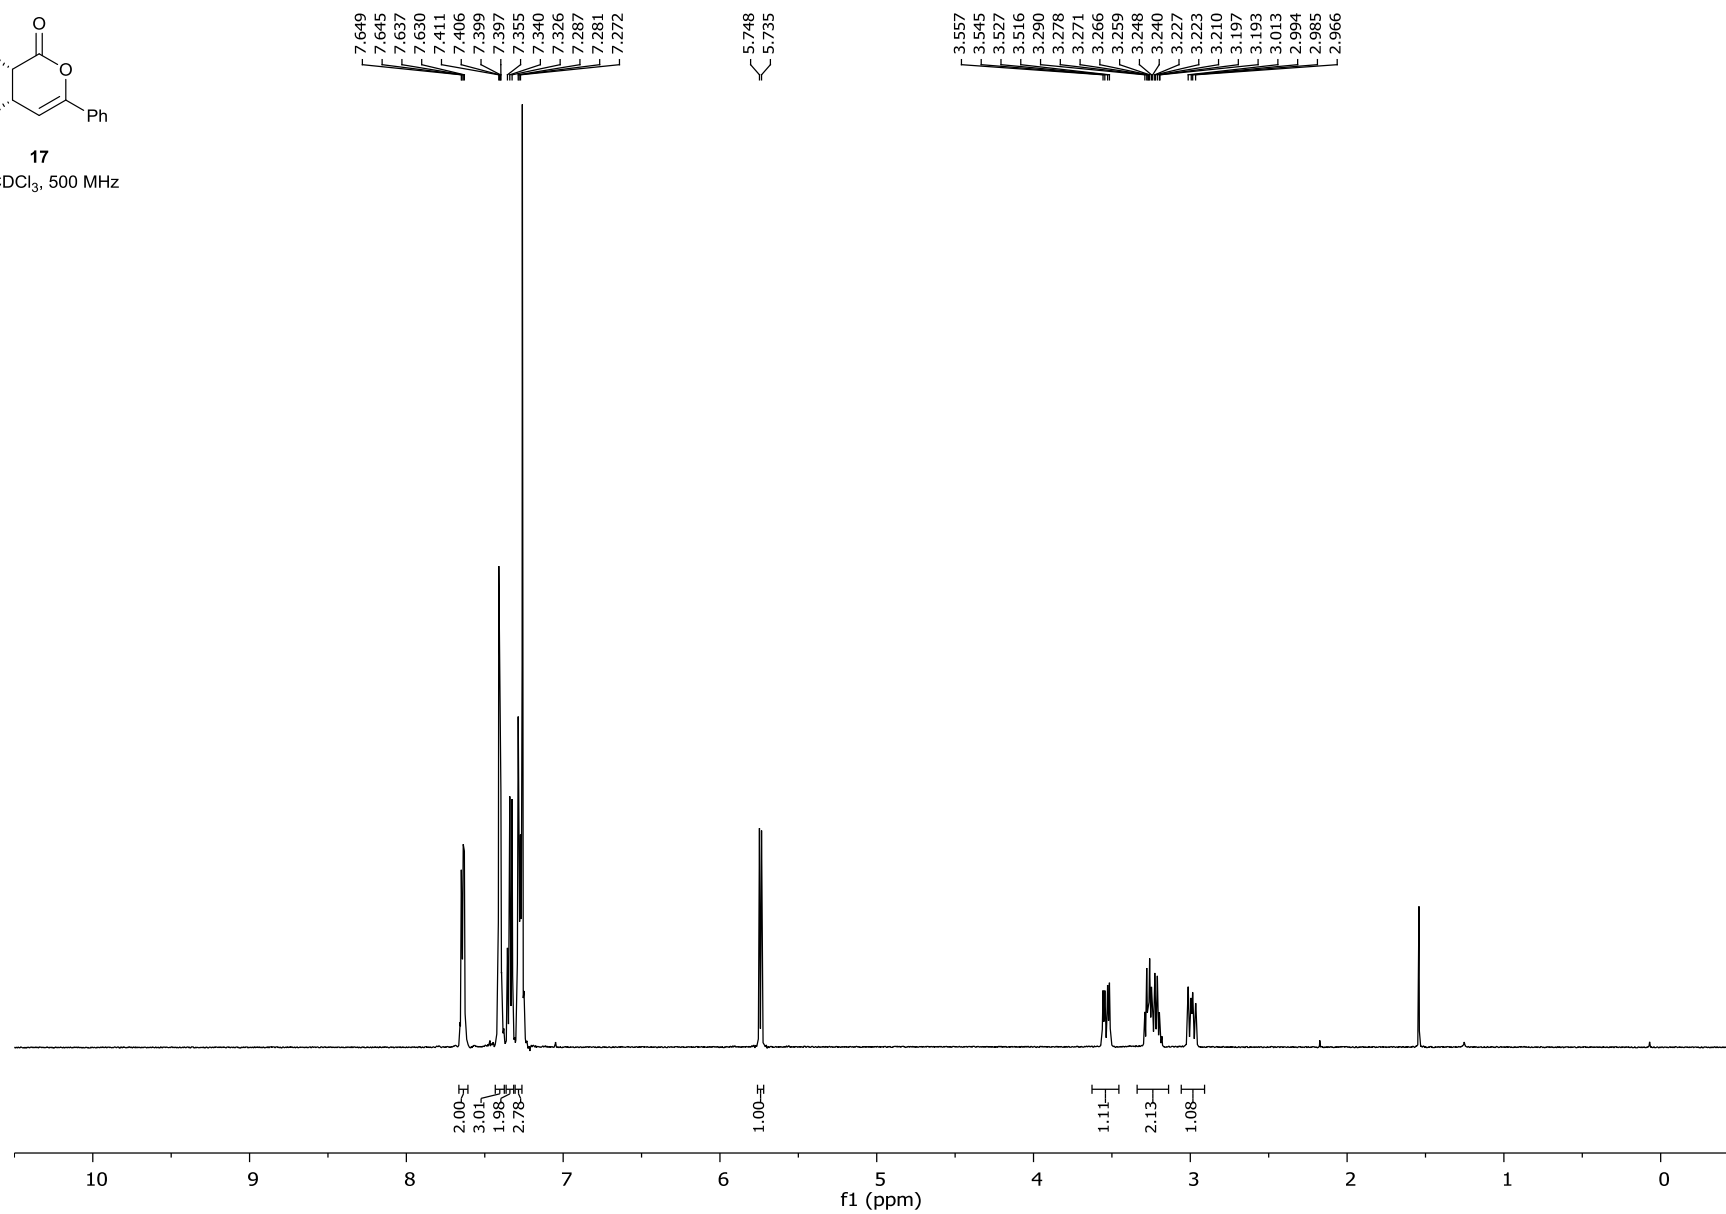

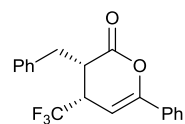

17

$^{13}\text{C}$ ,  $\text{CDCl}_3$ , 101 MHz

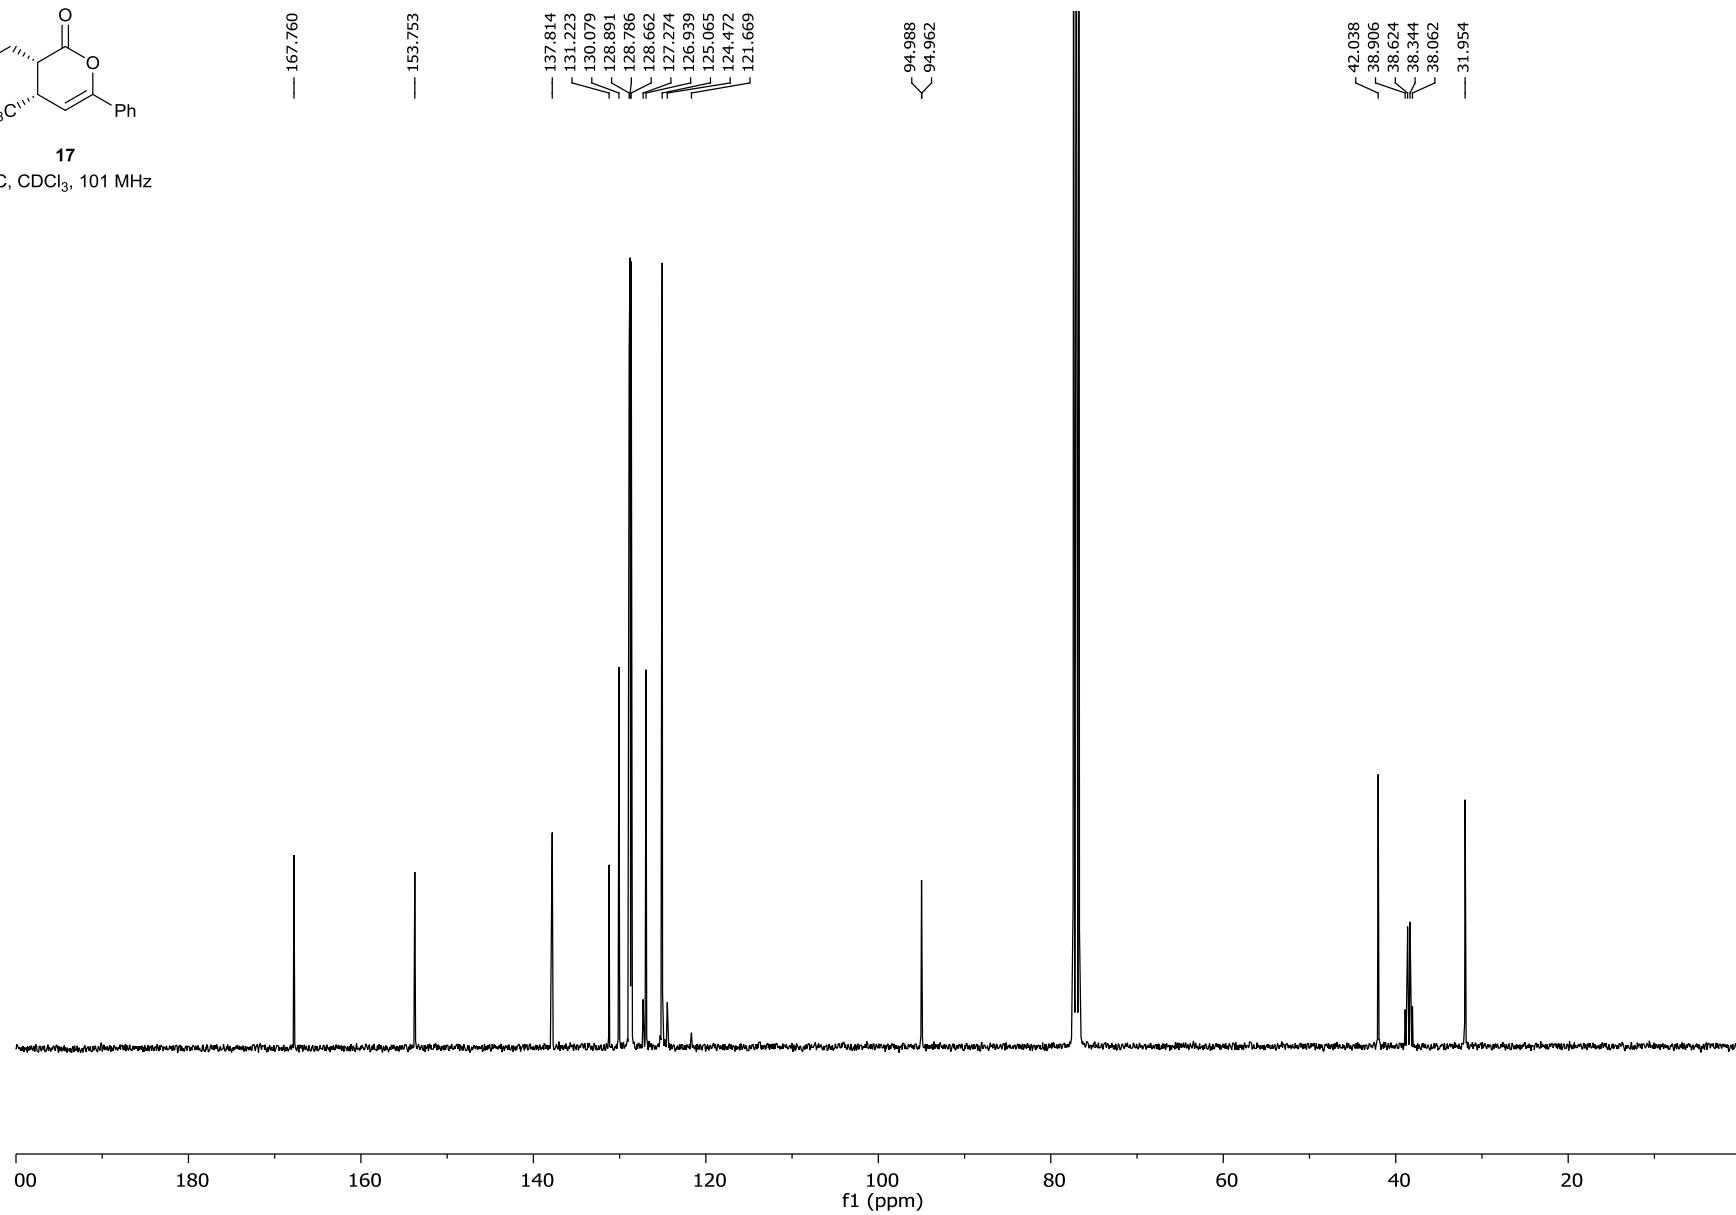

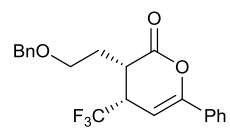

**18**

$^1\text{H}$ ,  $\text{CDCl}_3$ , 400 MHz

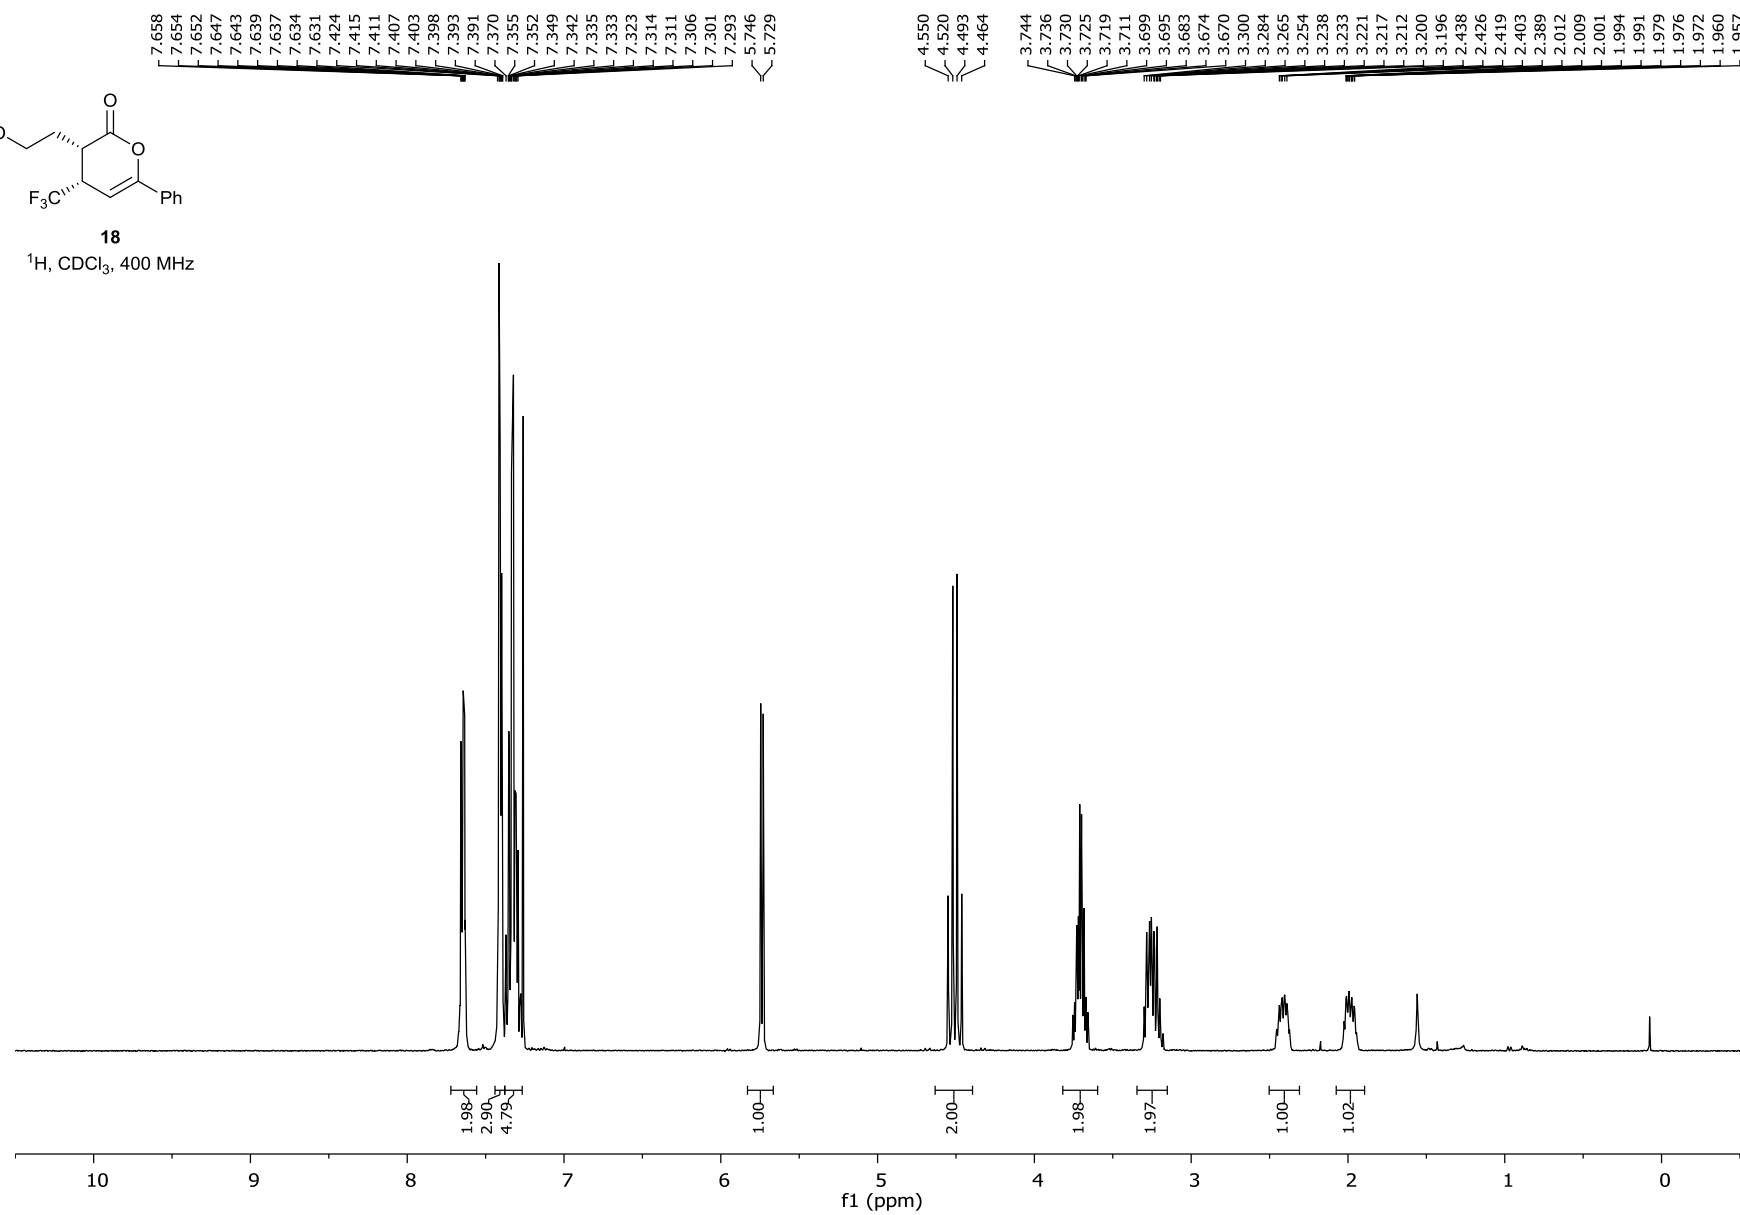

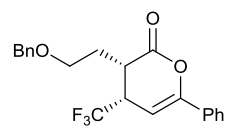

**18**

$^{13}\text{C}$ ,  $\text{CDCl}_3$ , 101 MHz

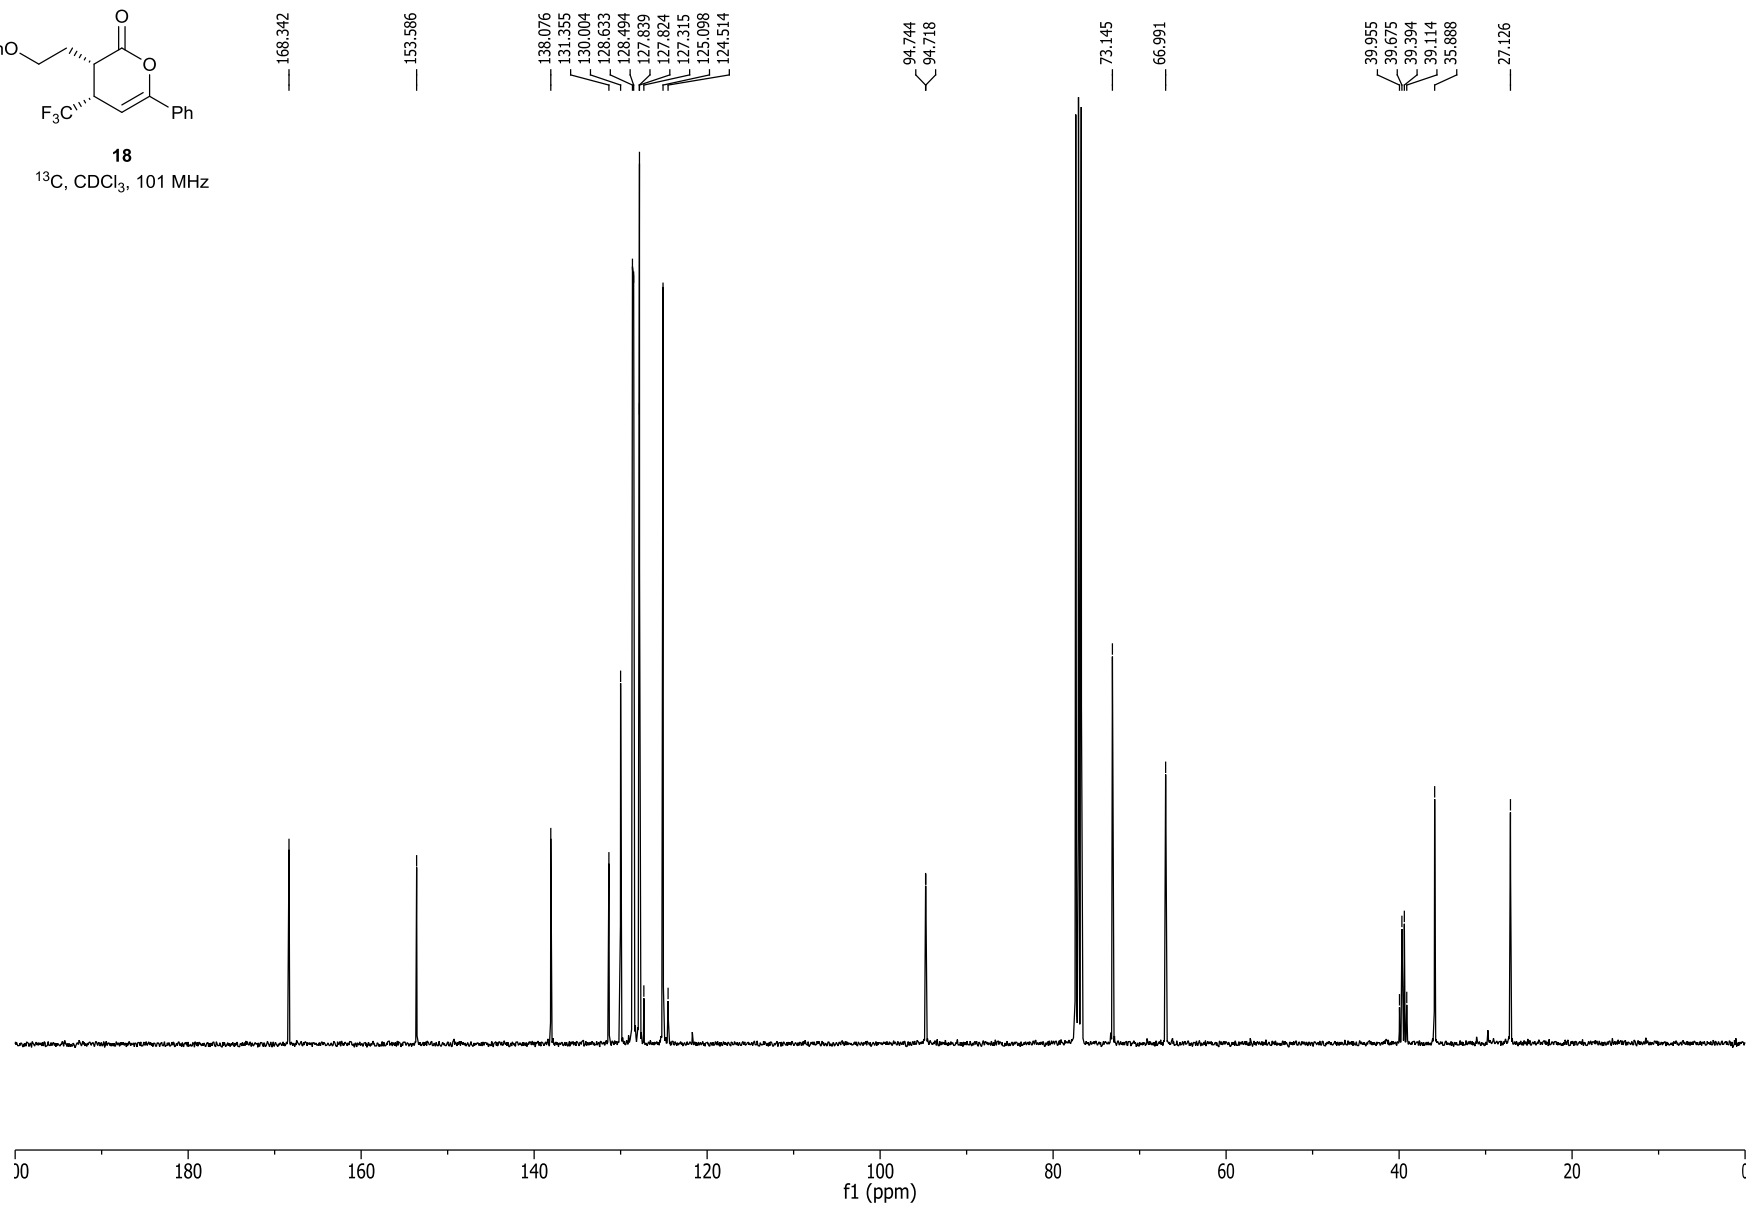

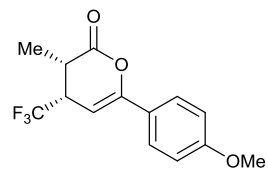

**19**

<sup>1</sup>H, CDCl<sub>3</sub>, 300 MHz

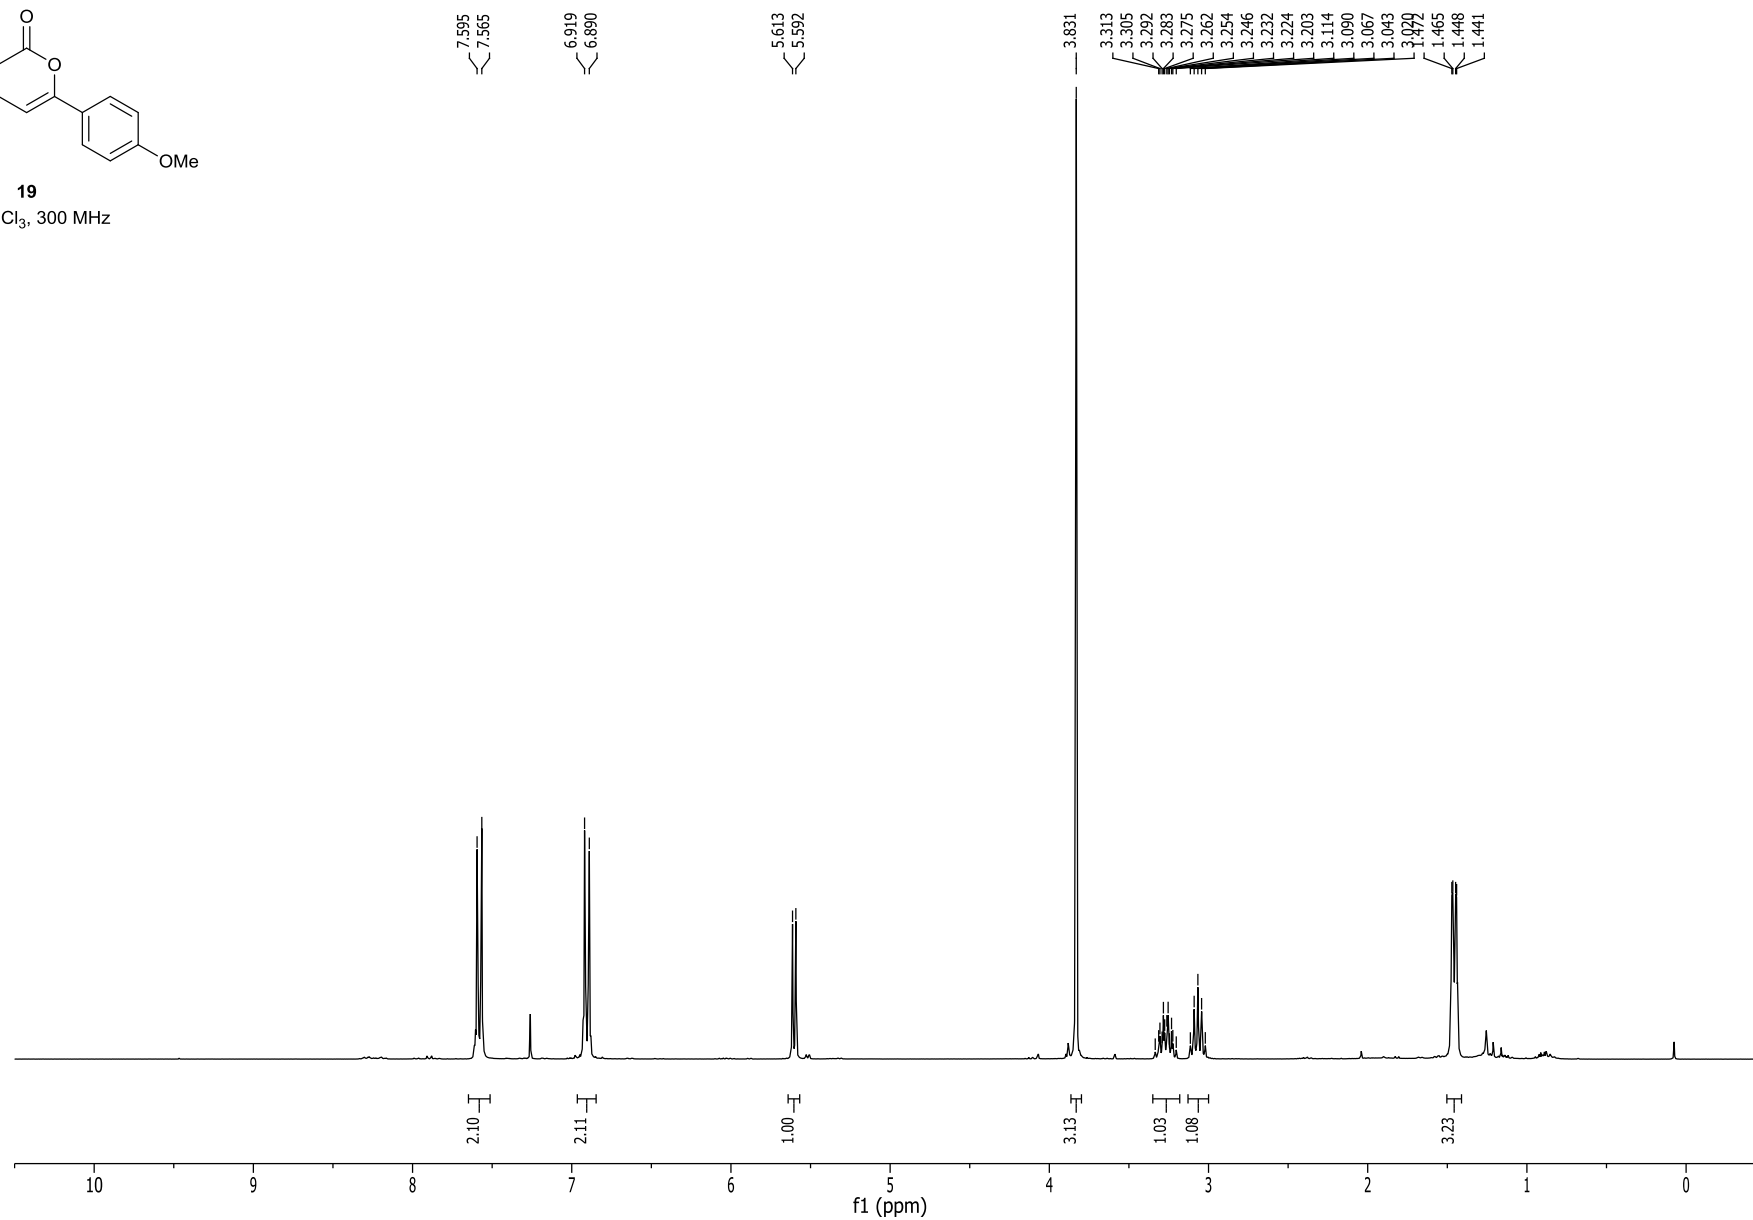

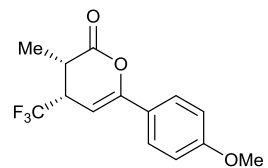

**19**

$^{13}\text{C}$ ,  $\text{CDCl}_3$ , 75 MHz

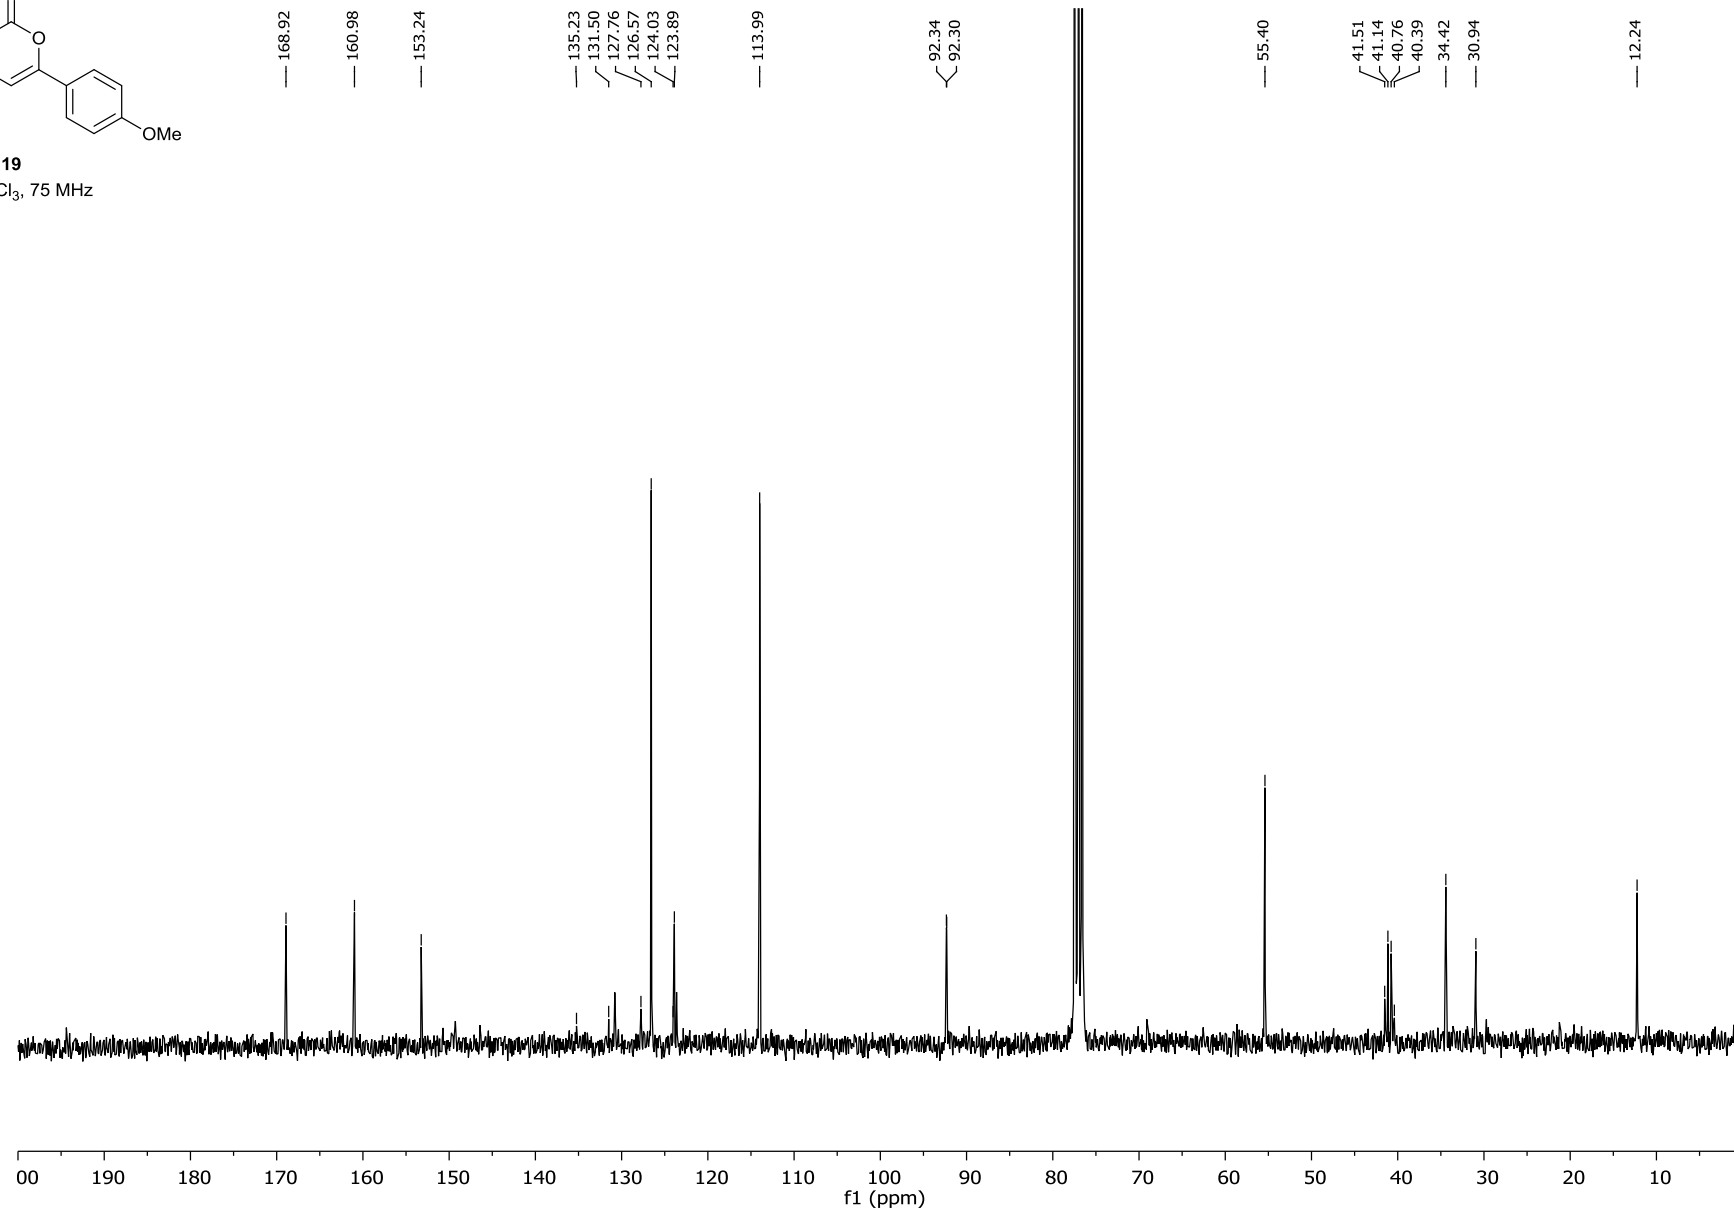

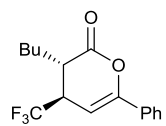

**20**

<sup>1</sup>H, CDCl<sub>3</sub>, 500 MHz

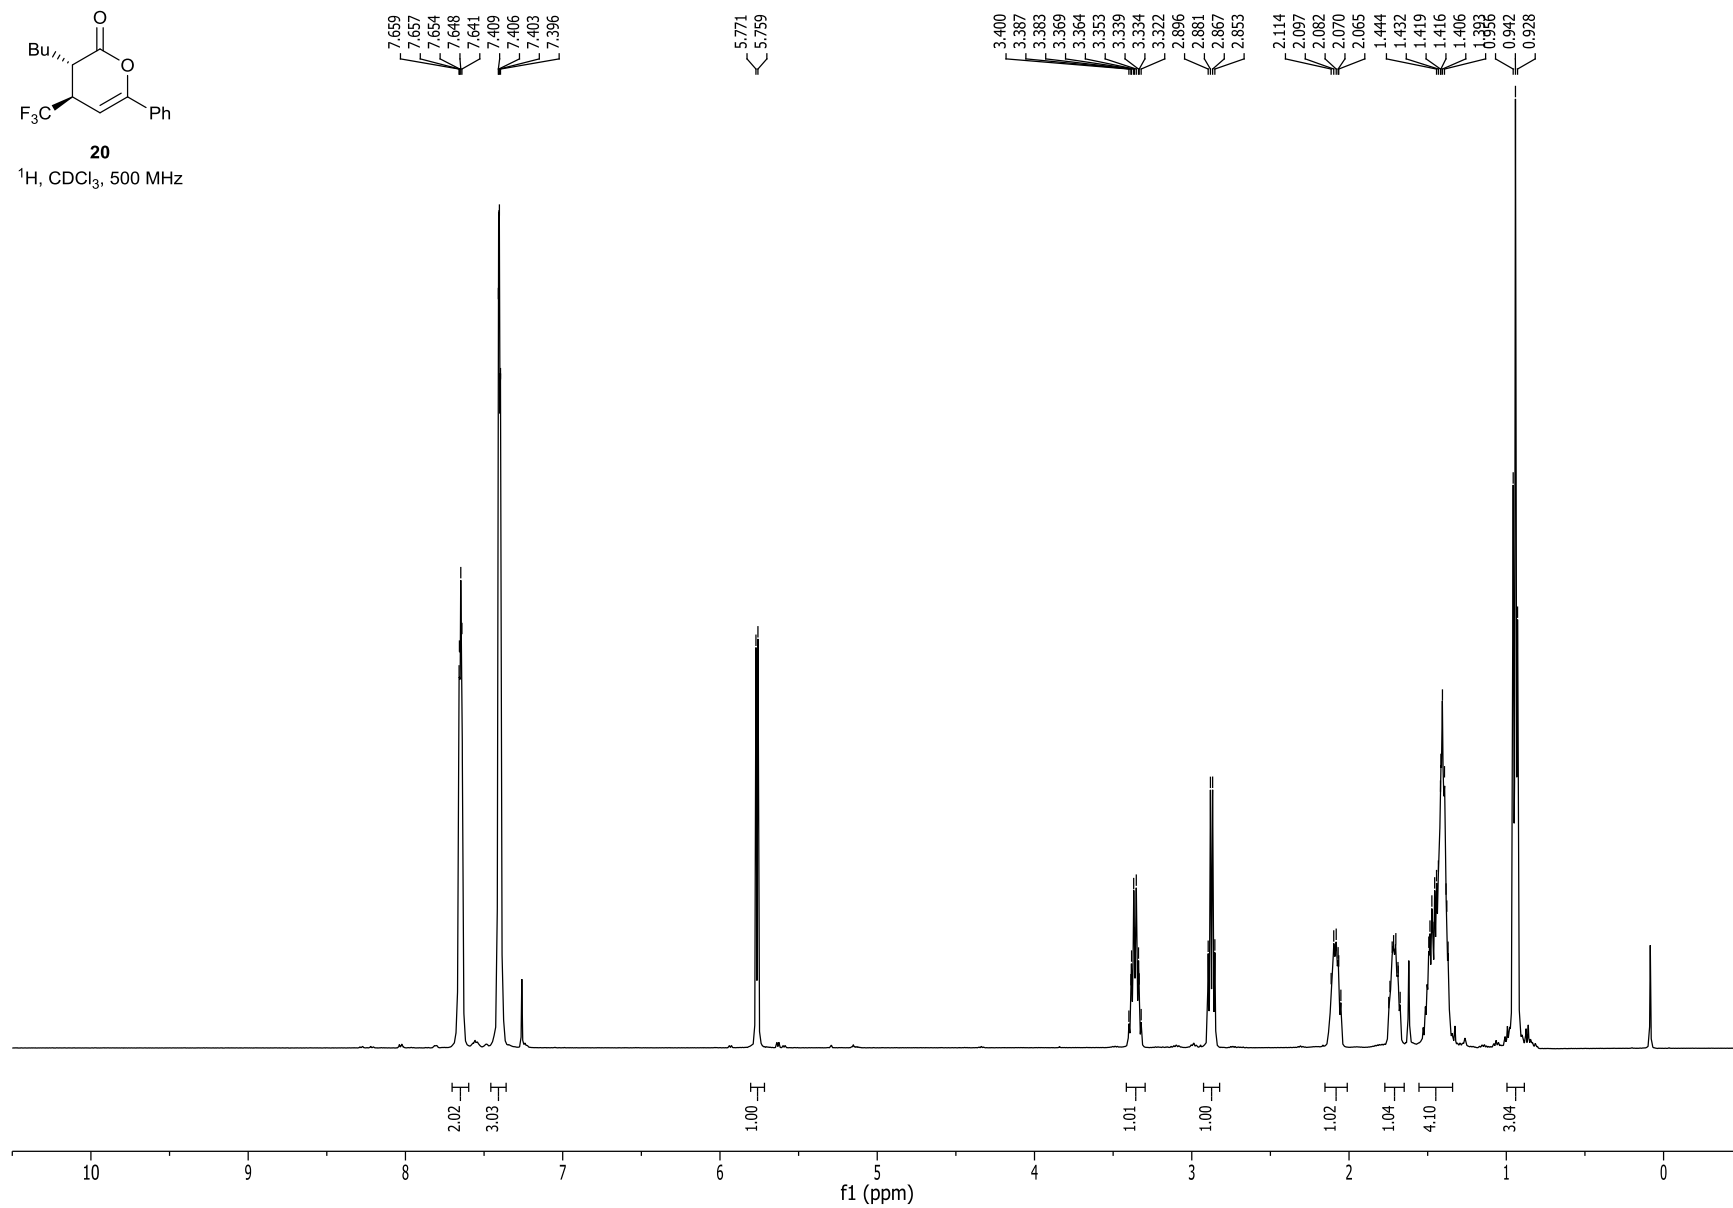



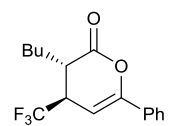

**20**  
 $^{13}\text{C}$ ,  $\text{CDCl}_3$ , 75 MHz

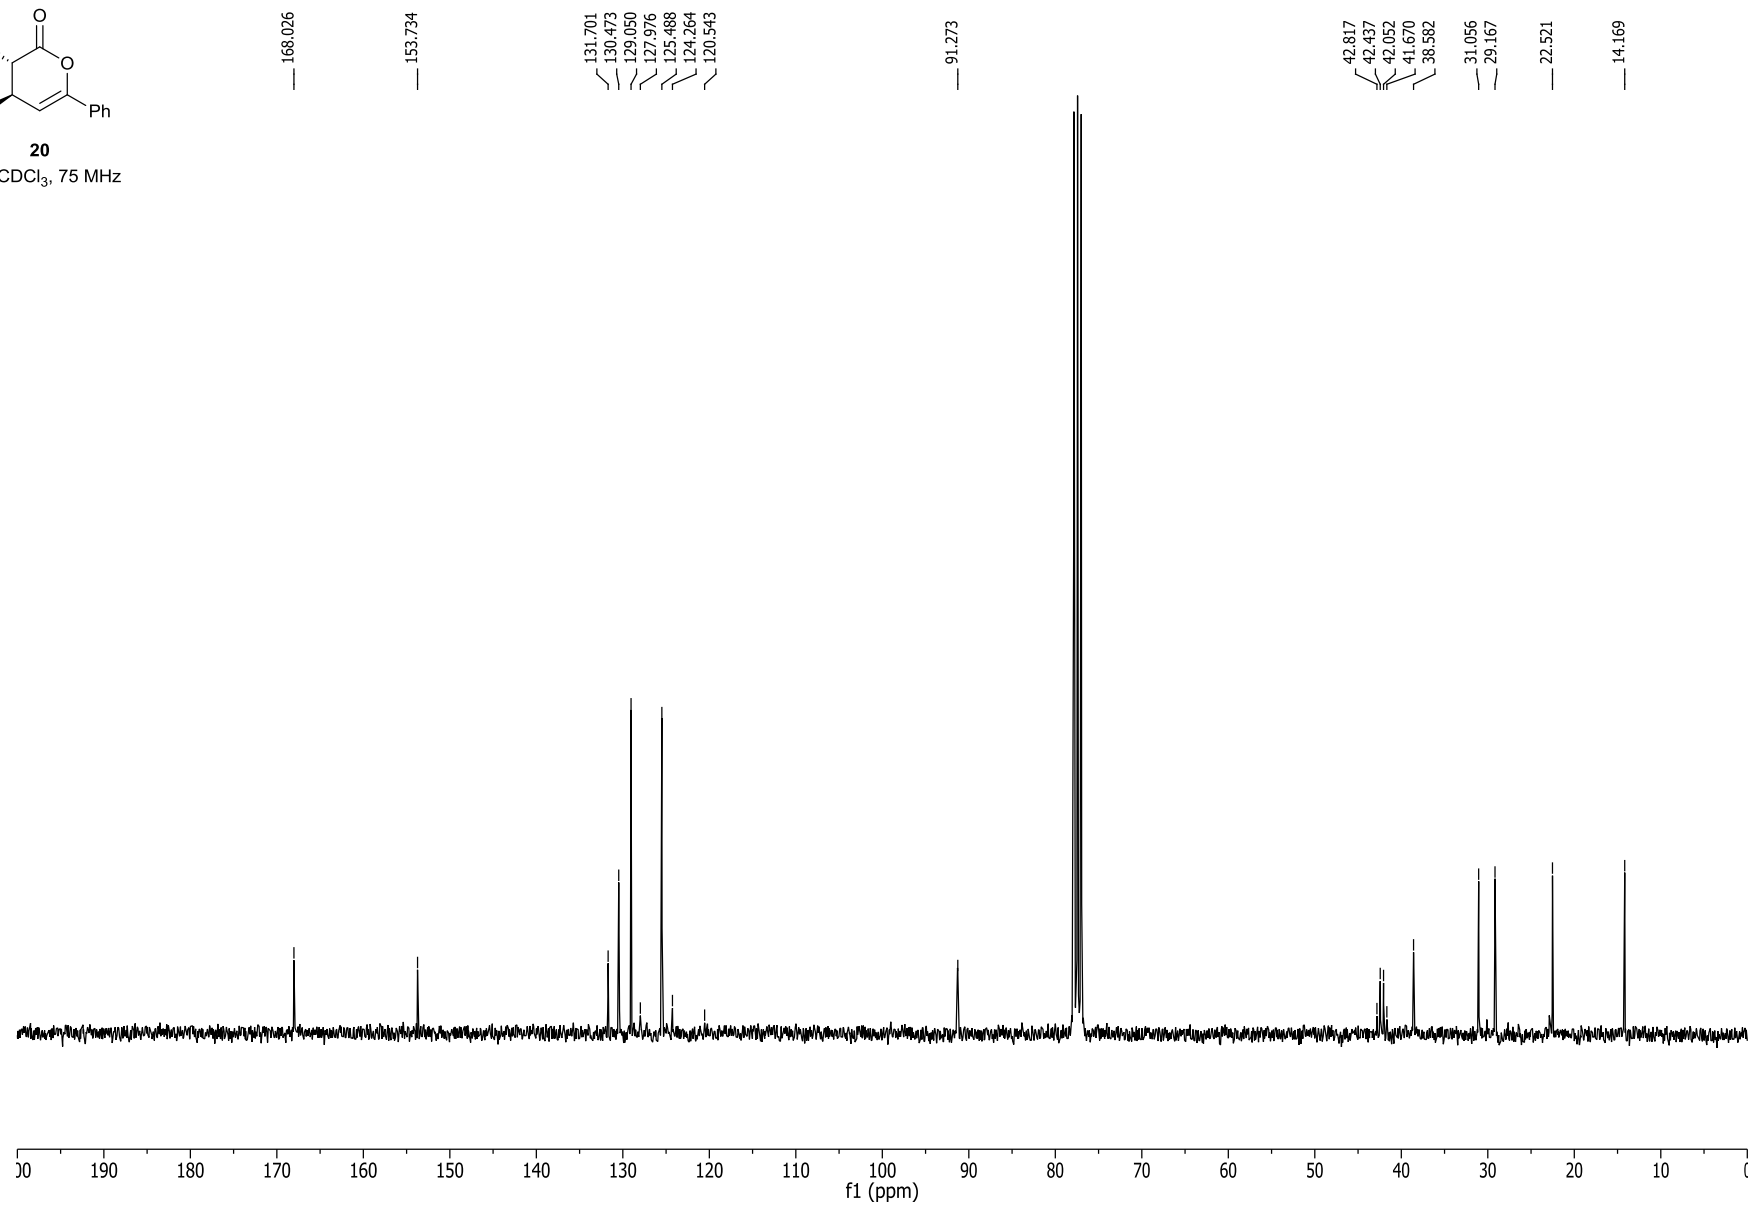

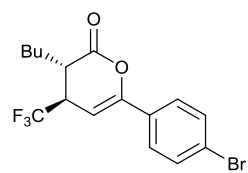

**21**

$^1\text{H}$ ,  $\text{CDCl}_3$ , 300 MHz

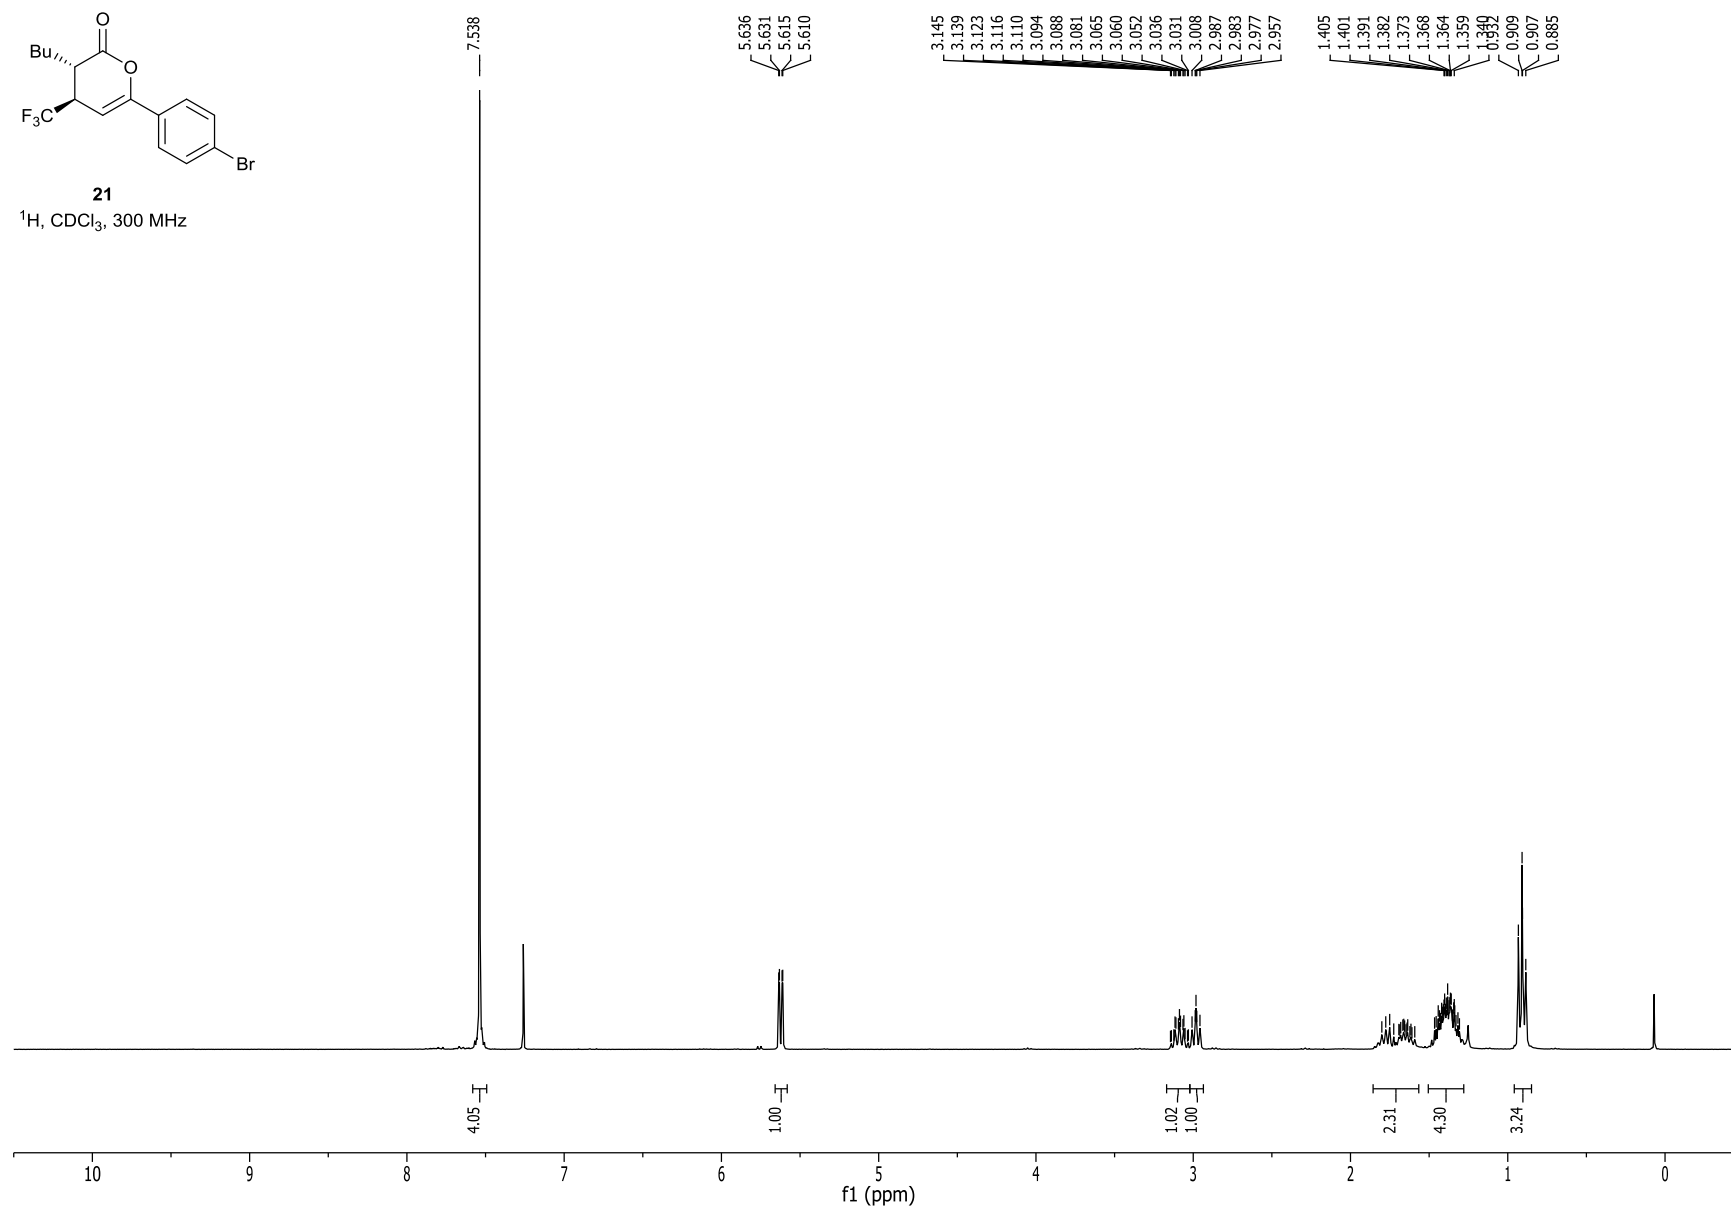

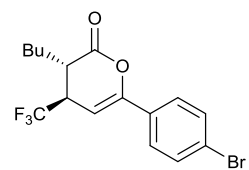

**21**

$^{13}\text{C}$ ,  $\text{CDCl}_3$ , 75 MHz

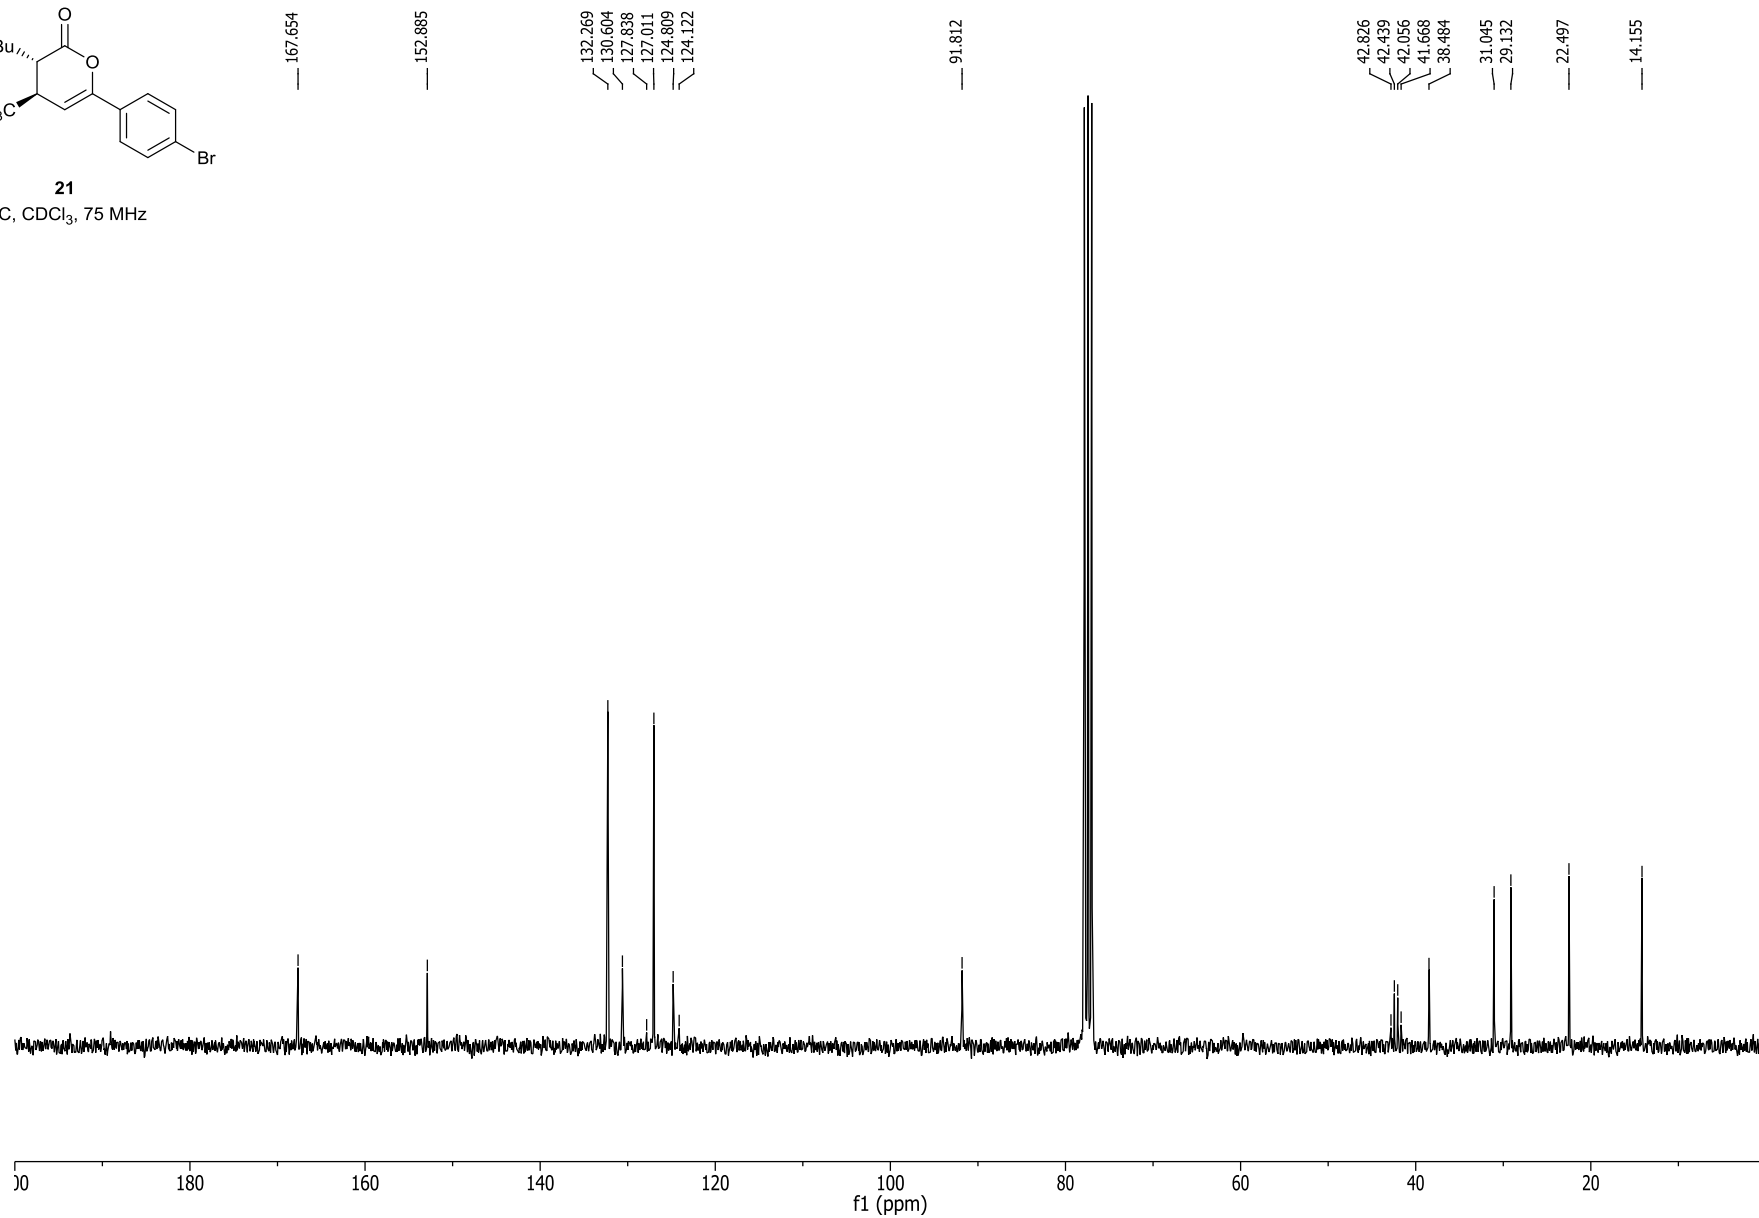

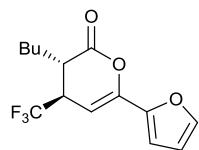

**22**

$^1\text{H}$ ,  $\text{CDCl}_3$ , 400 MHz

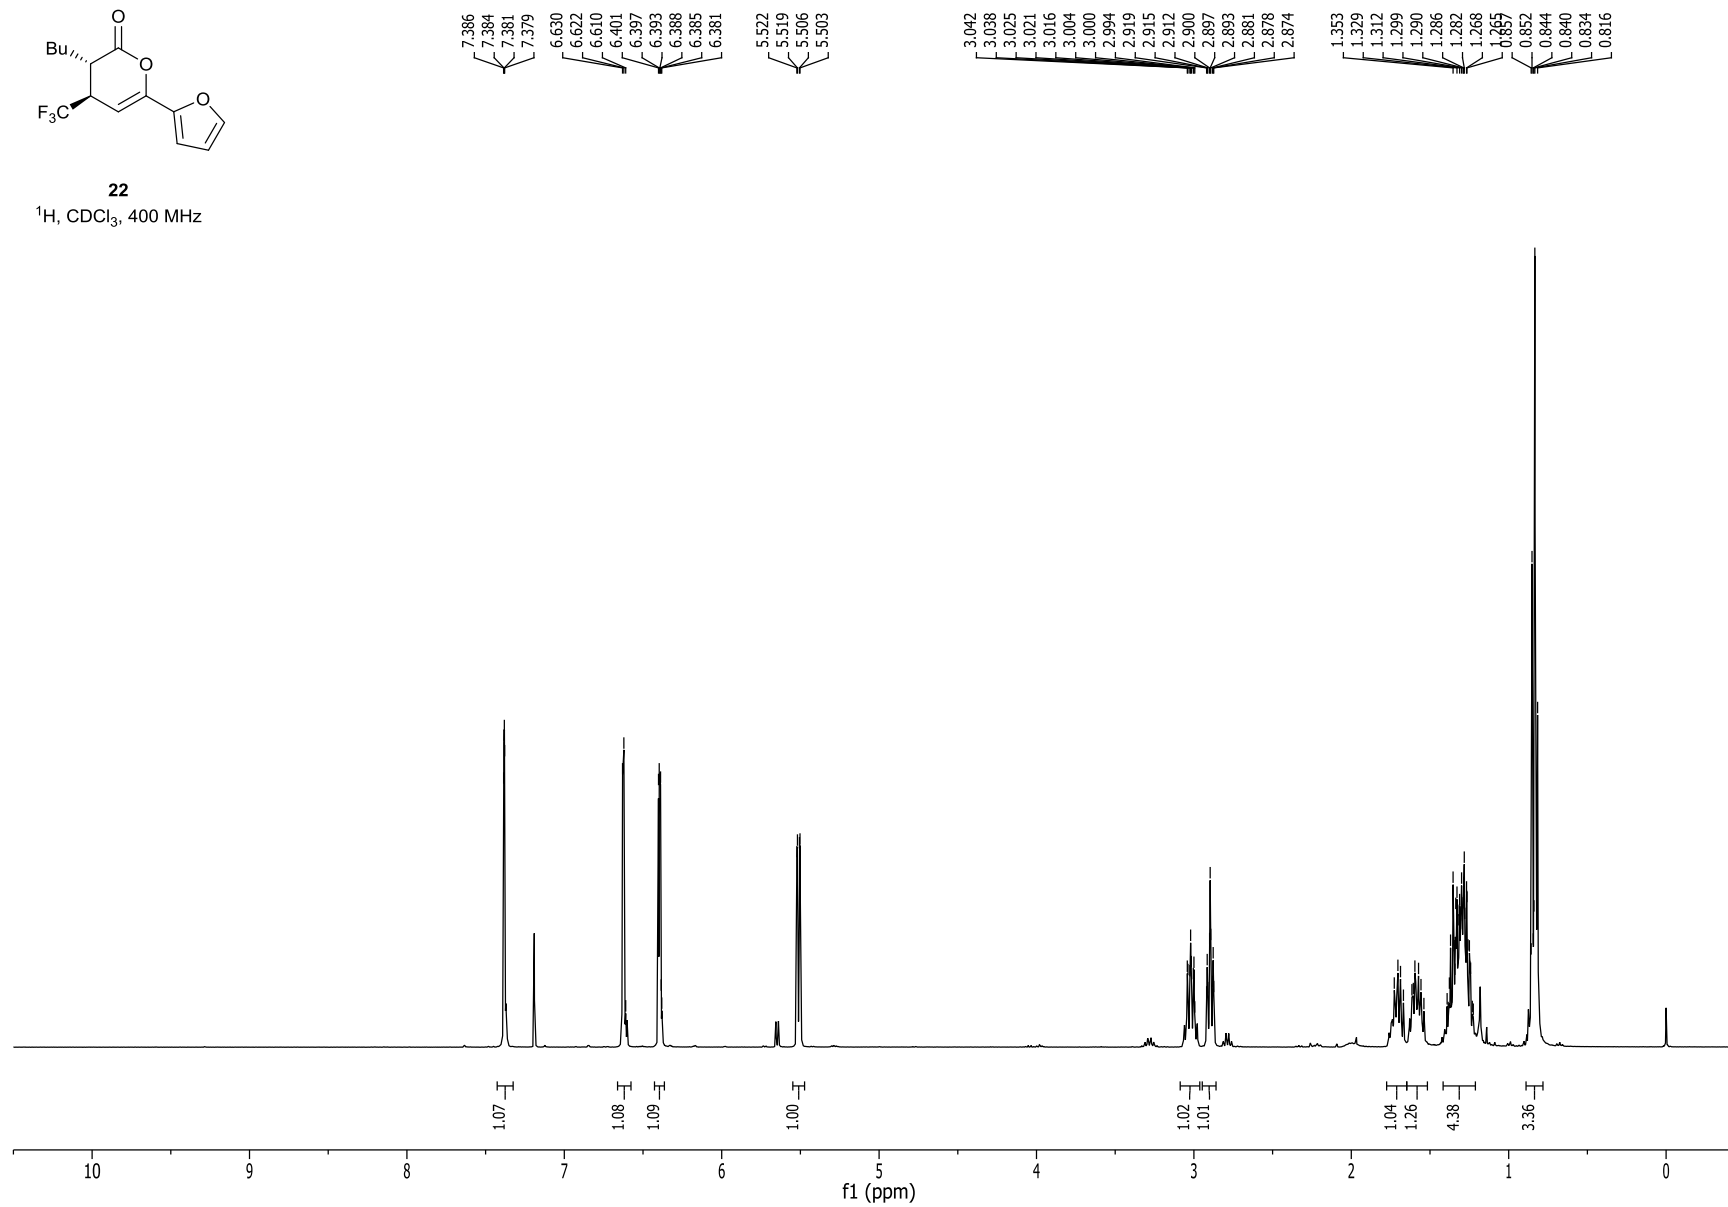

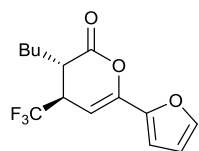

**22**

$^{13}\text{C}$ ,  $\text{CDCl}_3$ , 75 MHz

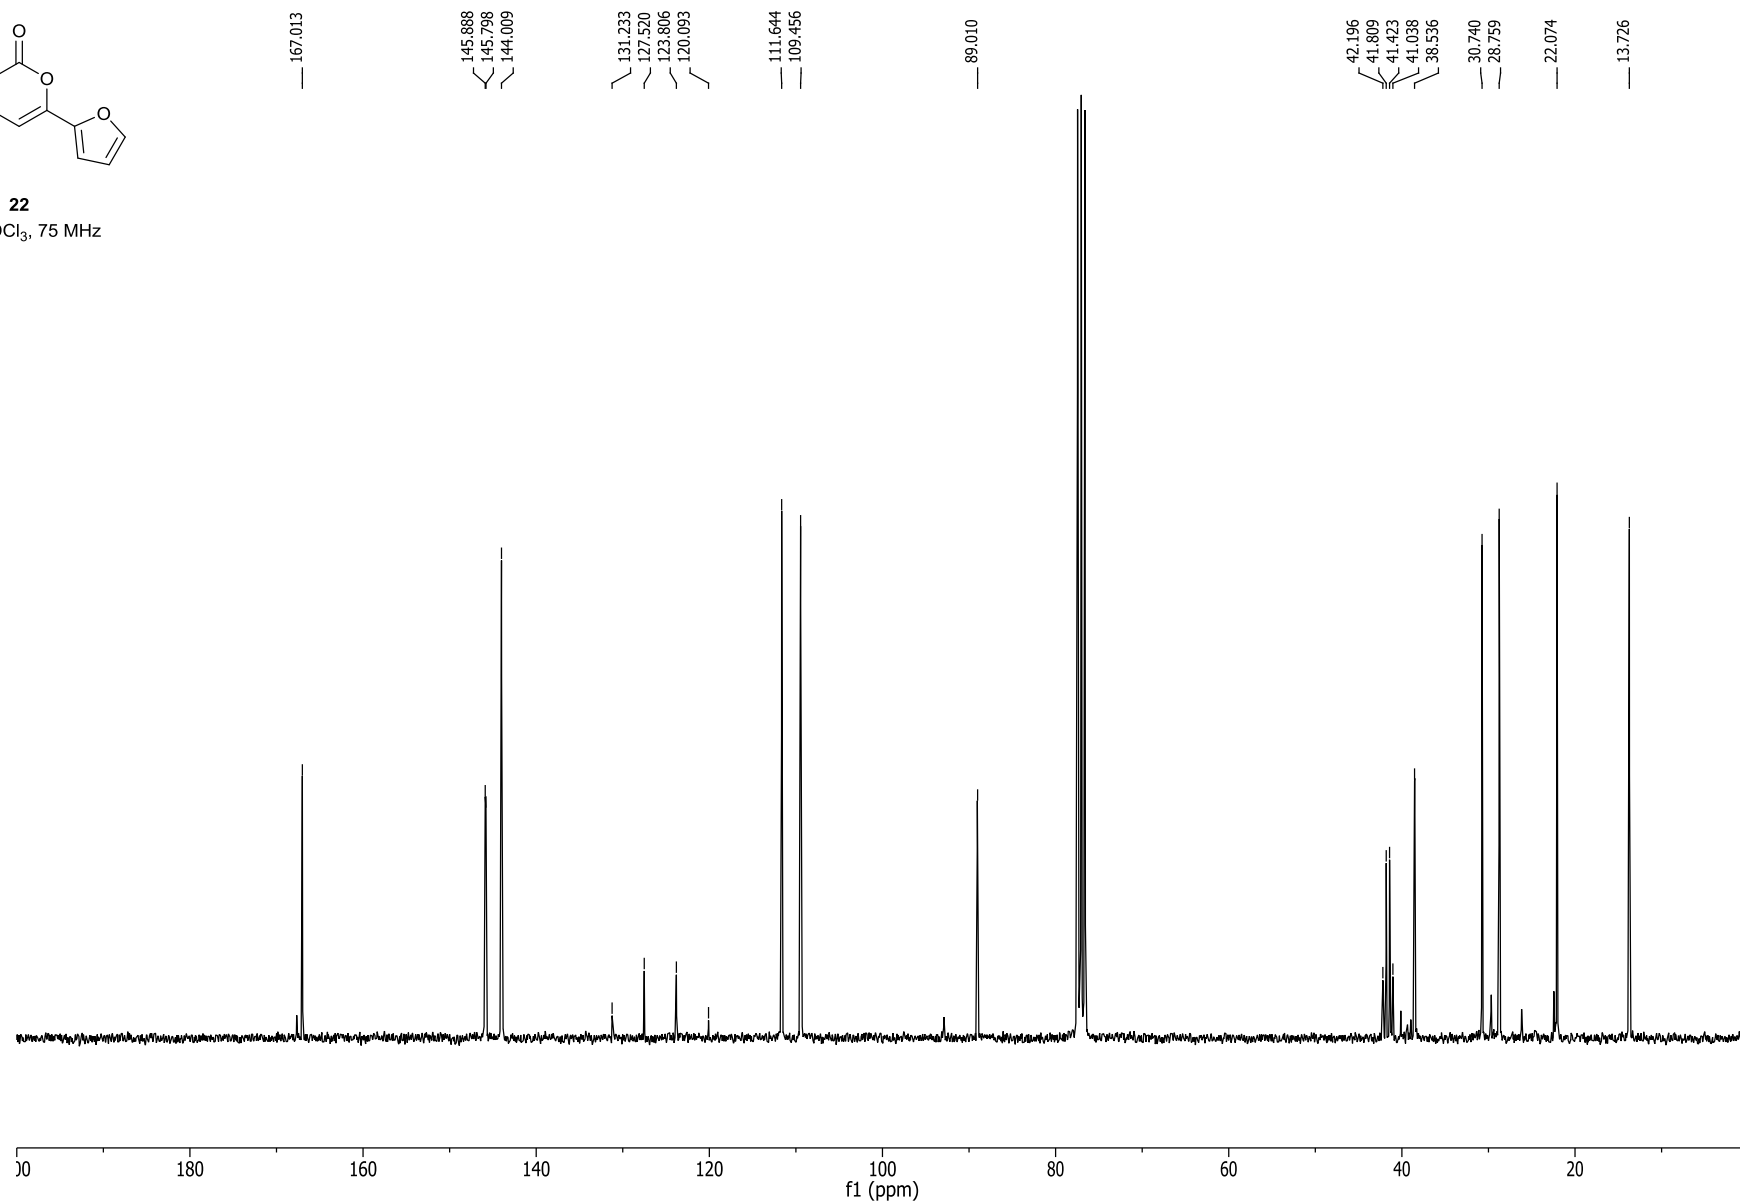

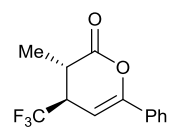

**23**

<sup>1</sup>H, CDCl<sub>3</sub>, 500 MHz

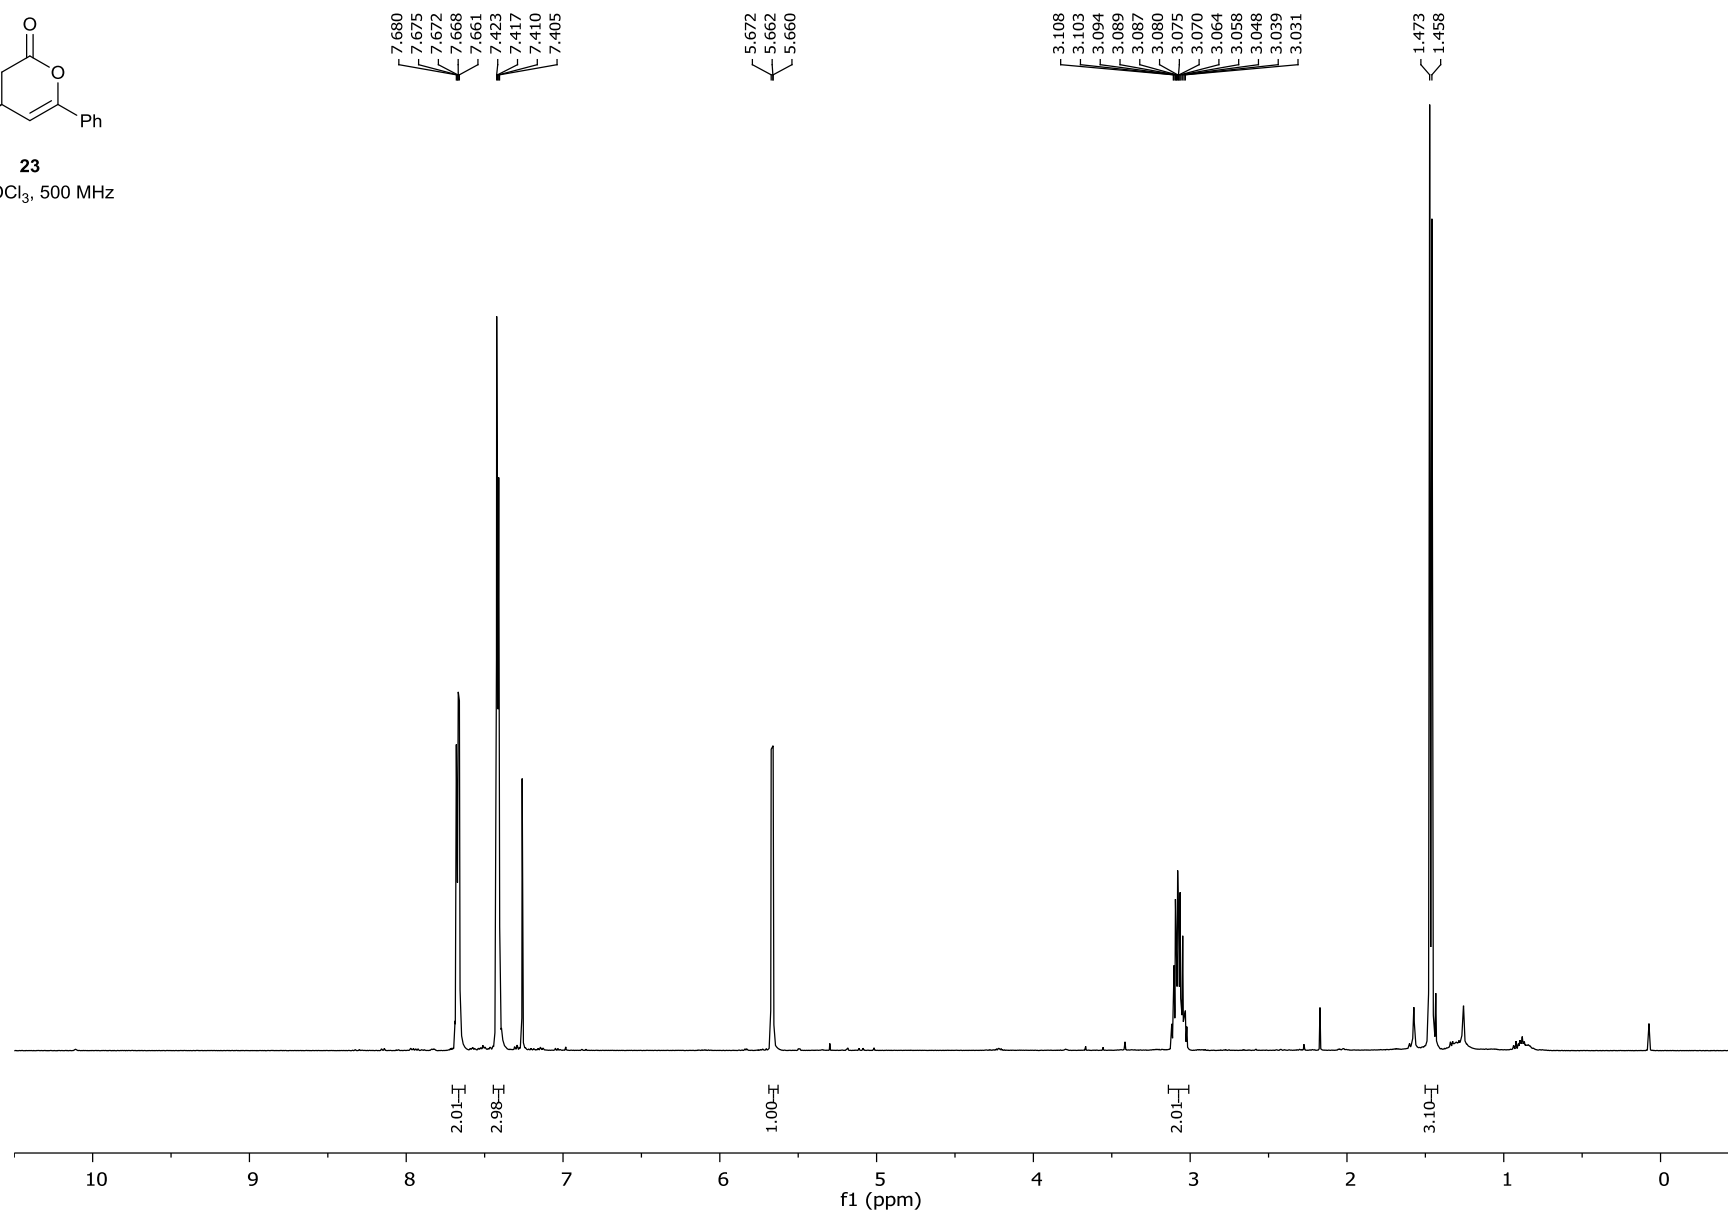

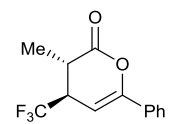

**23**

<sup>13</sup>C, CDCl<sub>3</sub>, 126 MHz

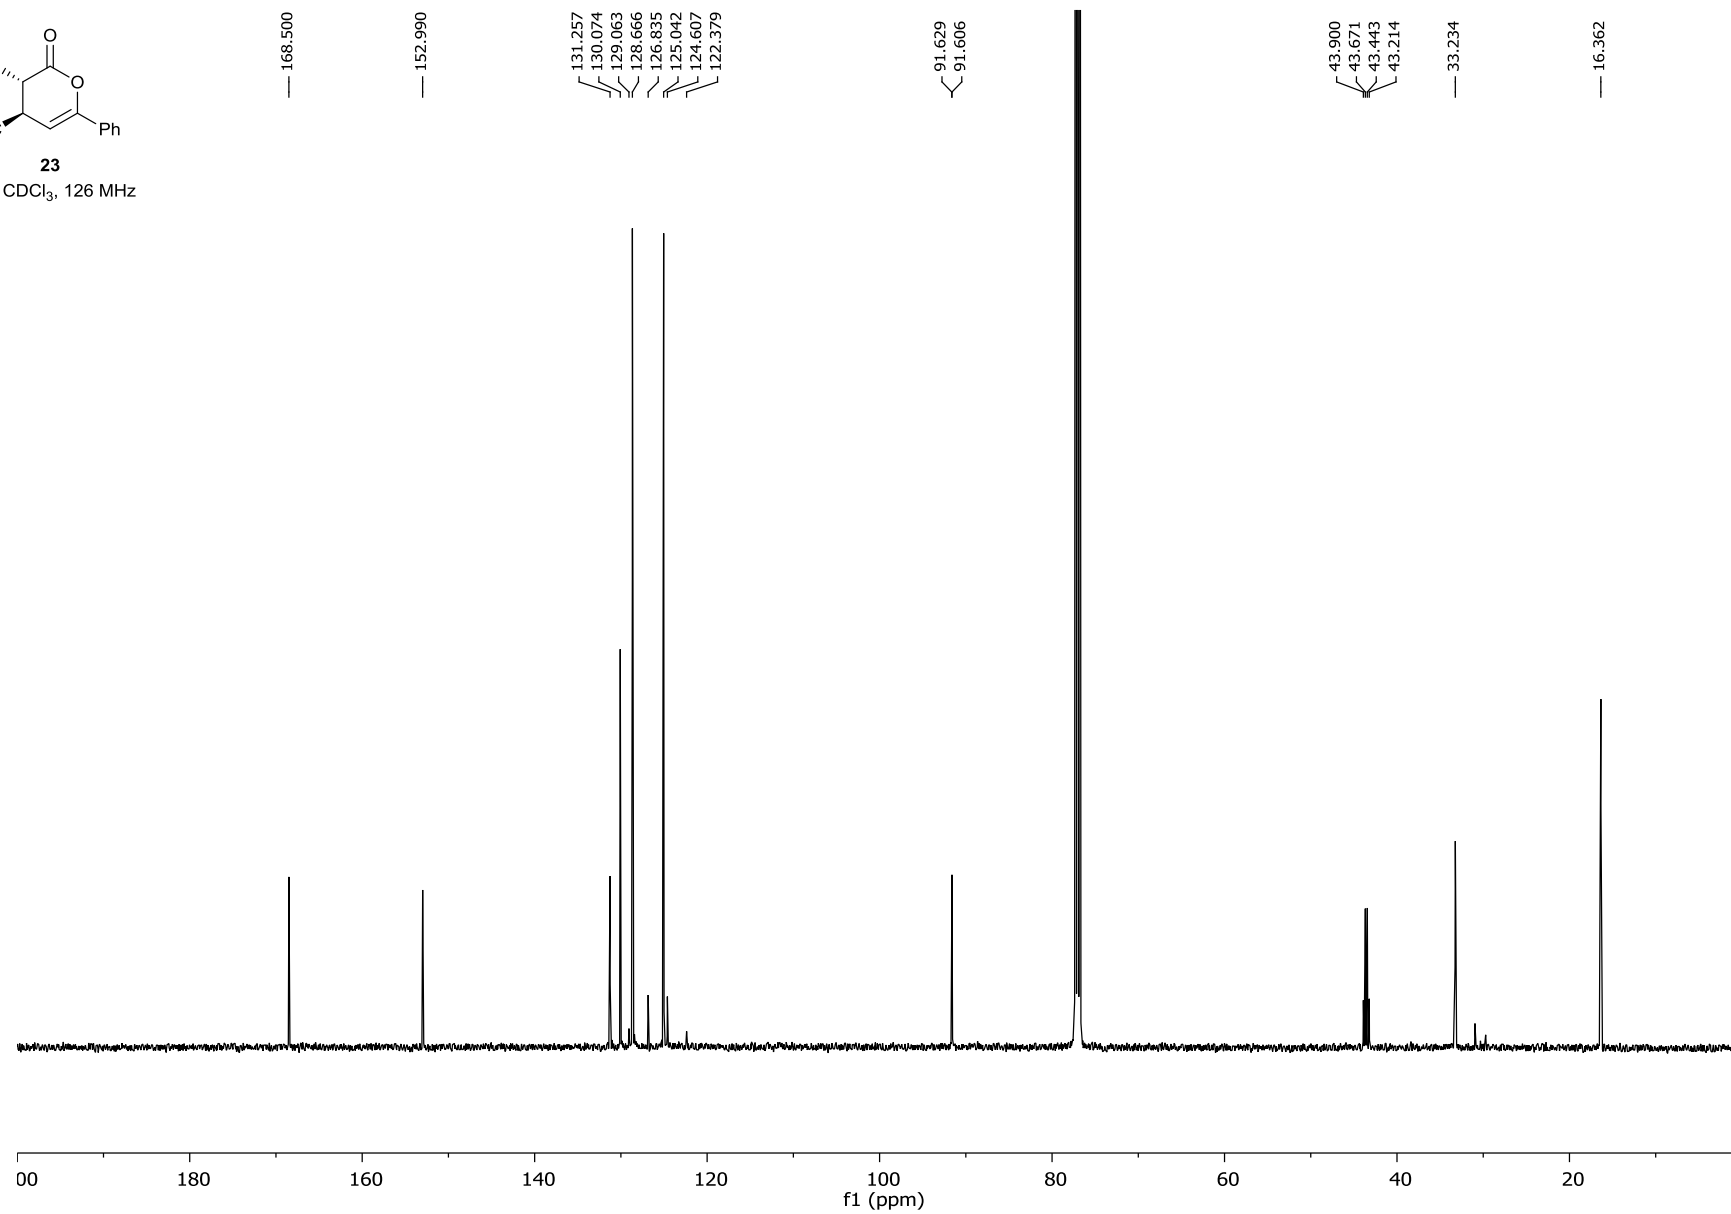

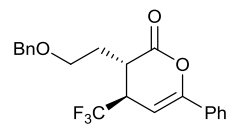

**24**

$^1\text{H}$ ,  $\text{CDCl}_3$ , 300 MHz

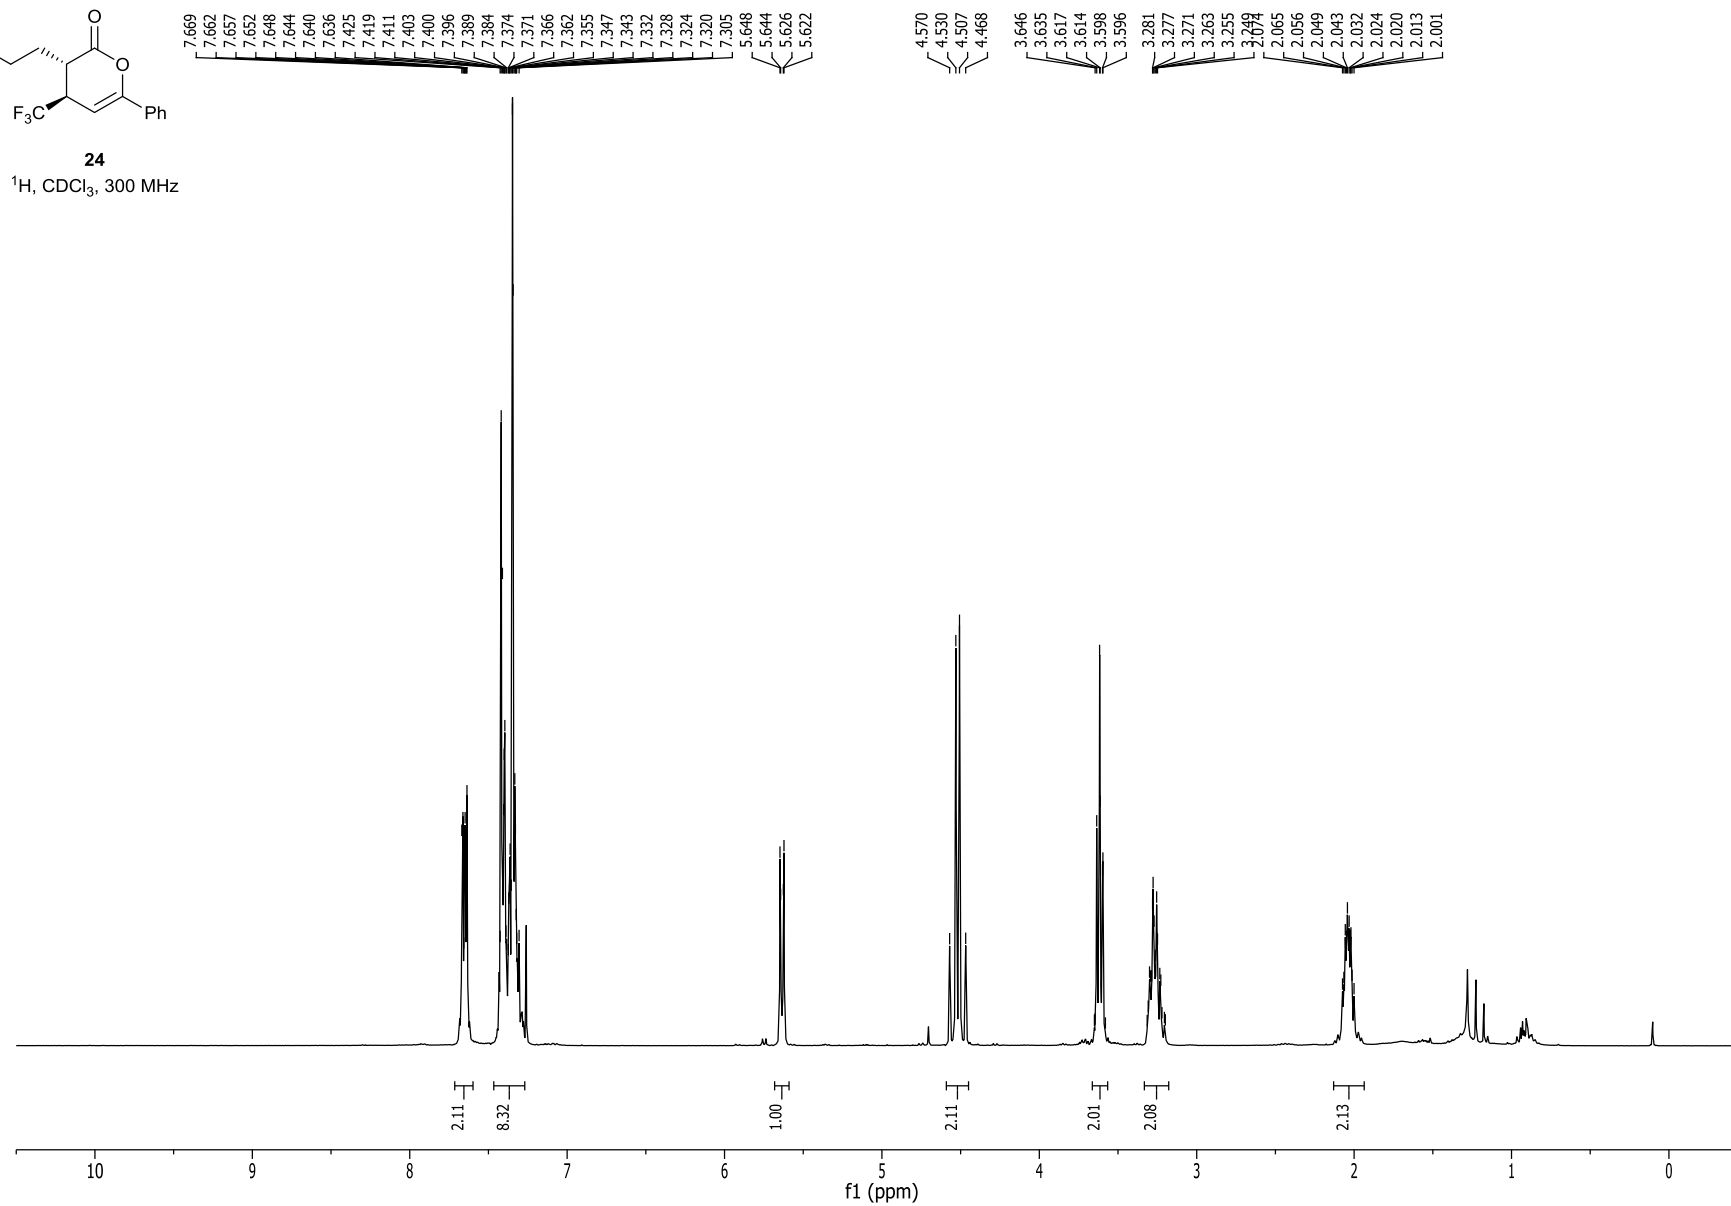



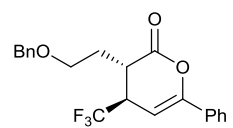

**24**

$^{13}\text{C}$ ,  $\text{CDCl}_3$ , 75 MHz

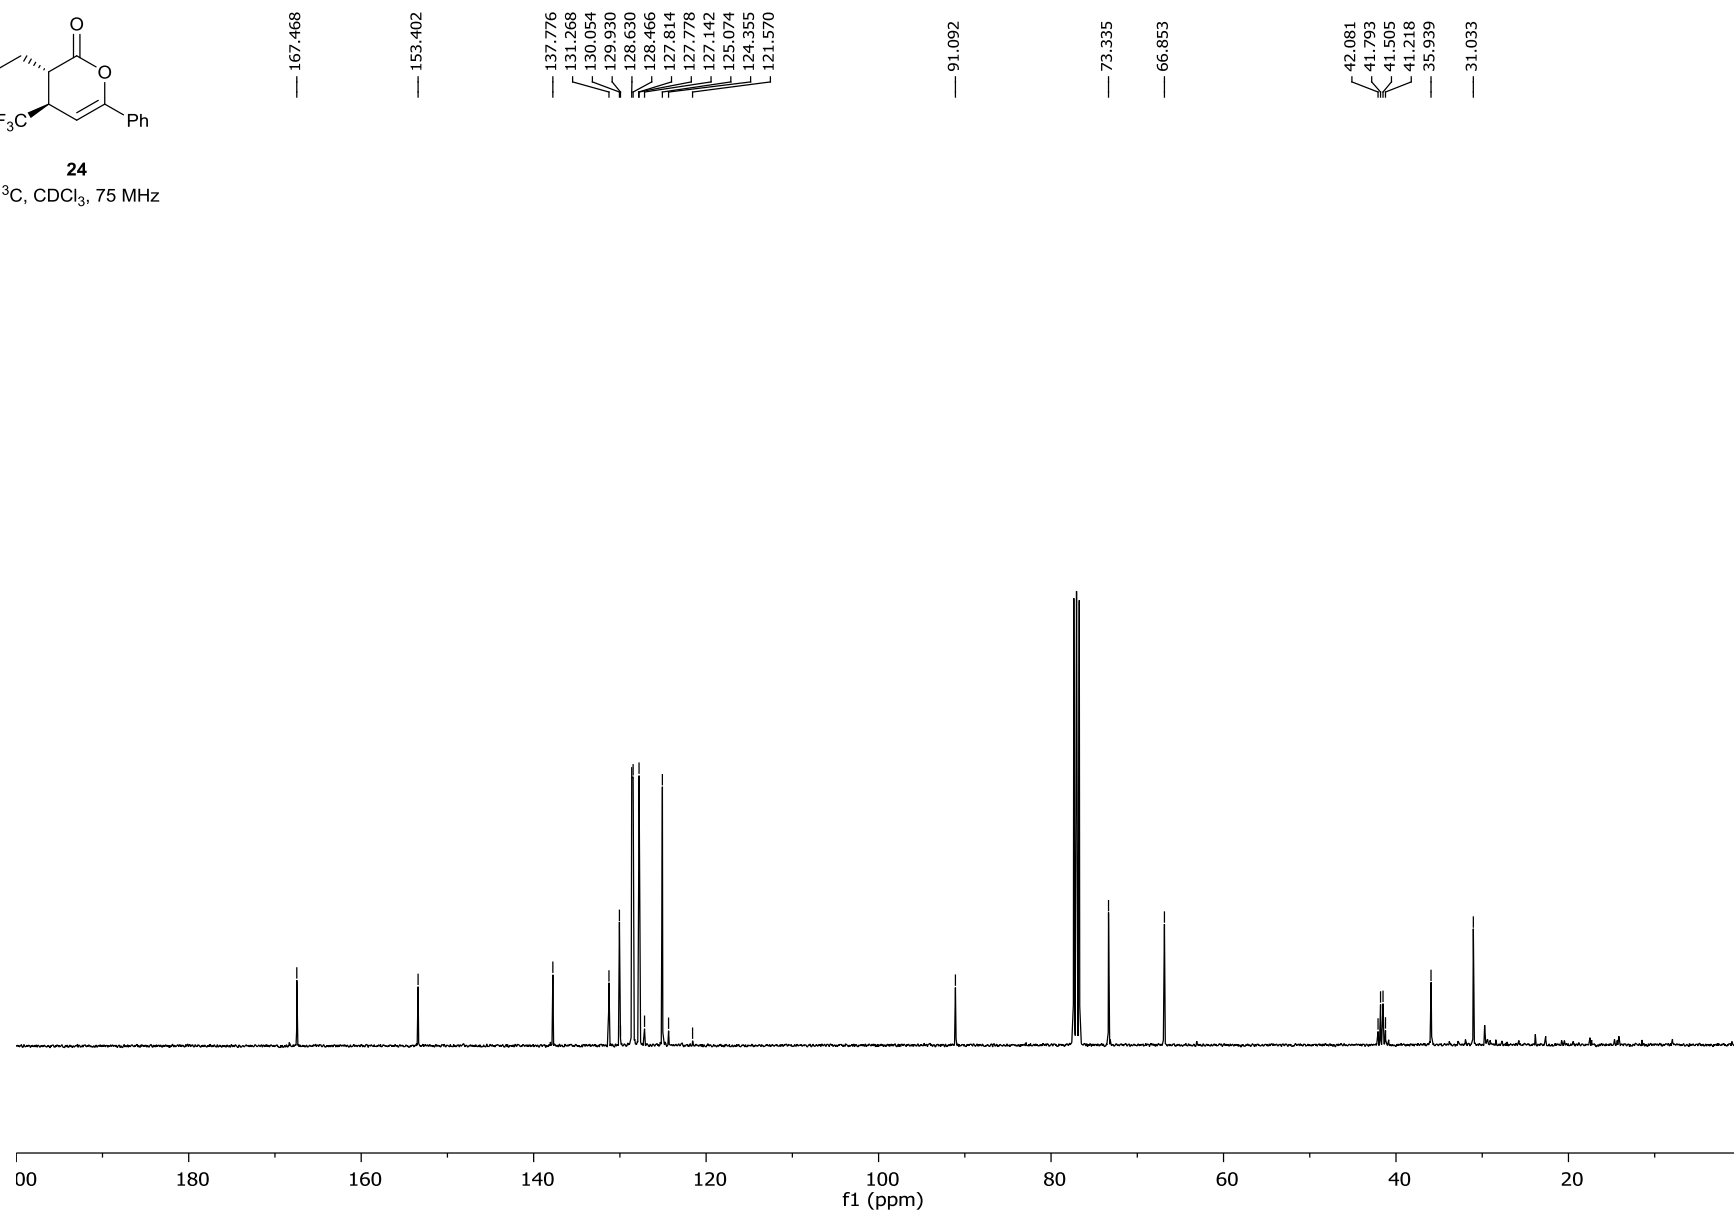

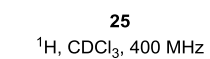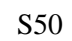

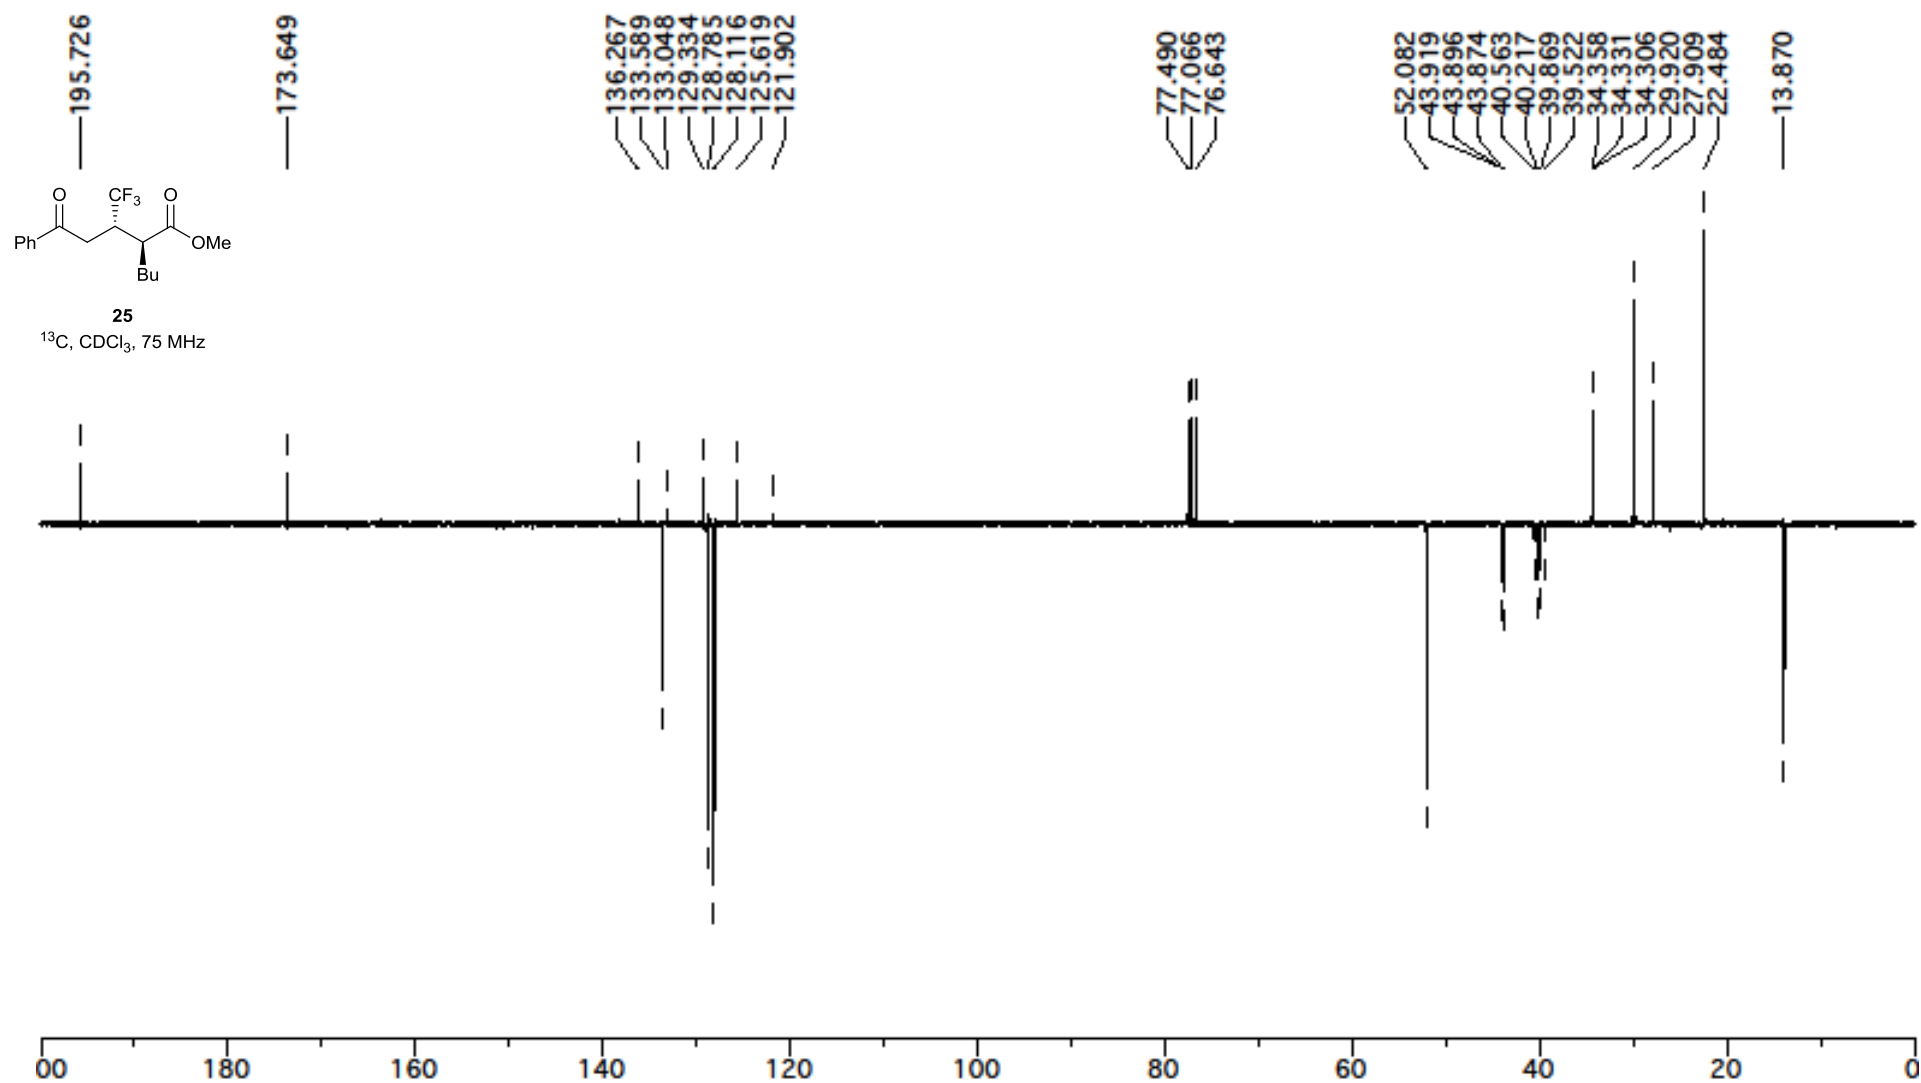

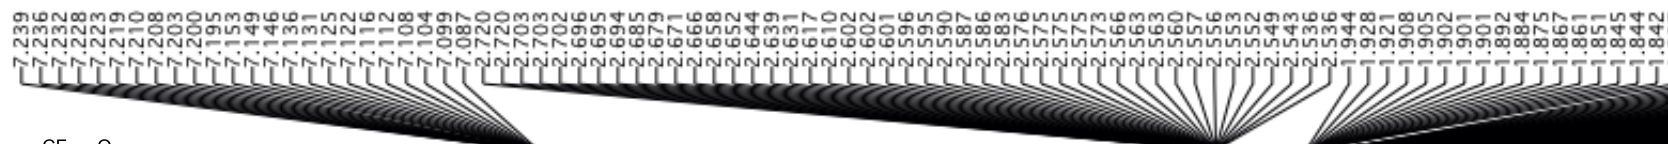<sup>1</sup>H, CDCl<sub>3</sub>, 400 MHz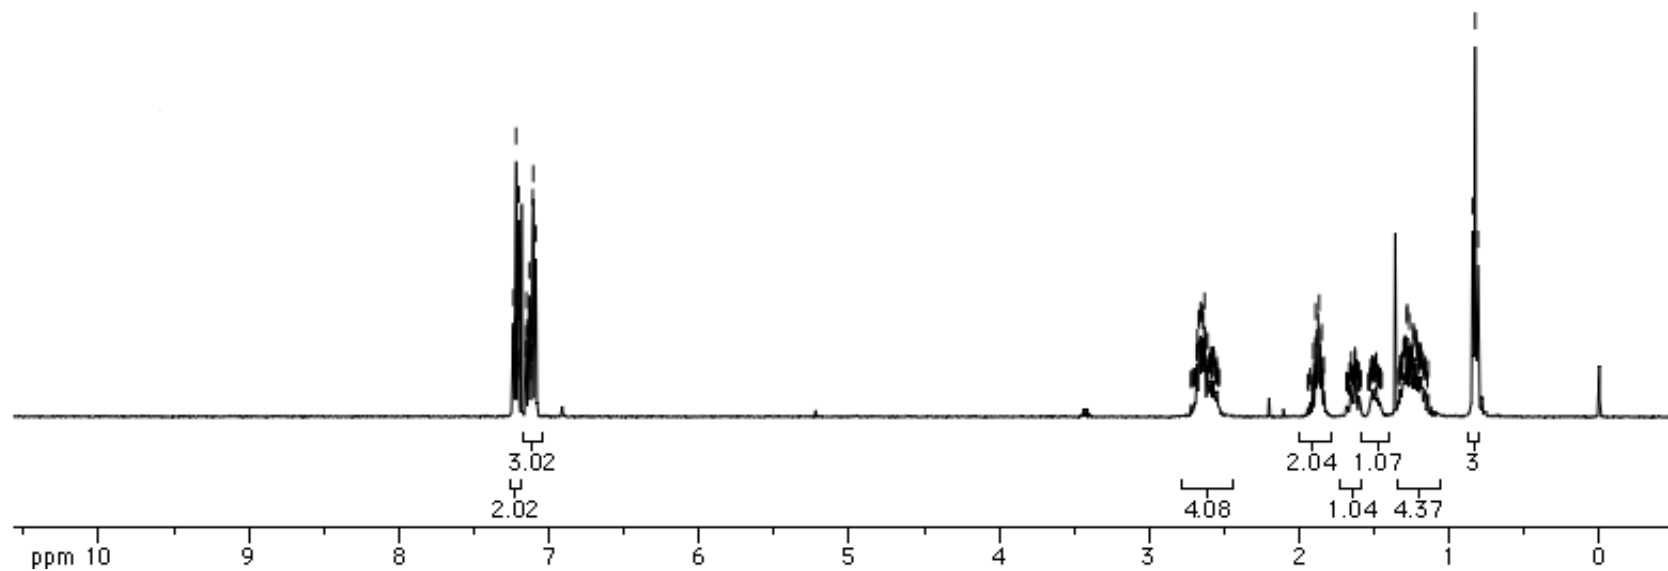

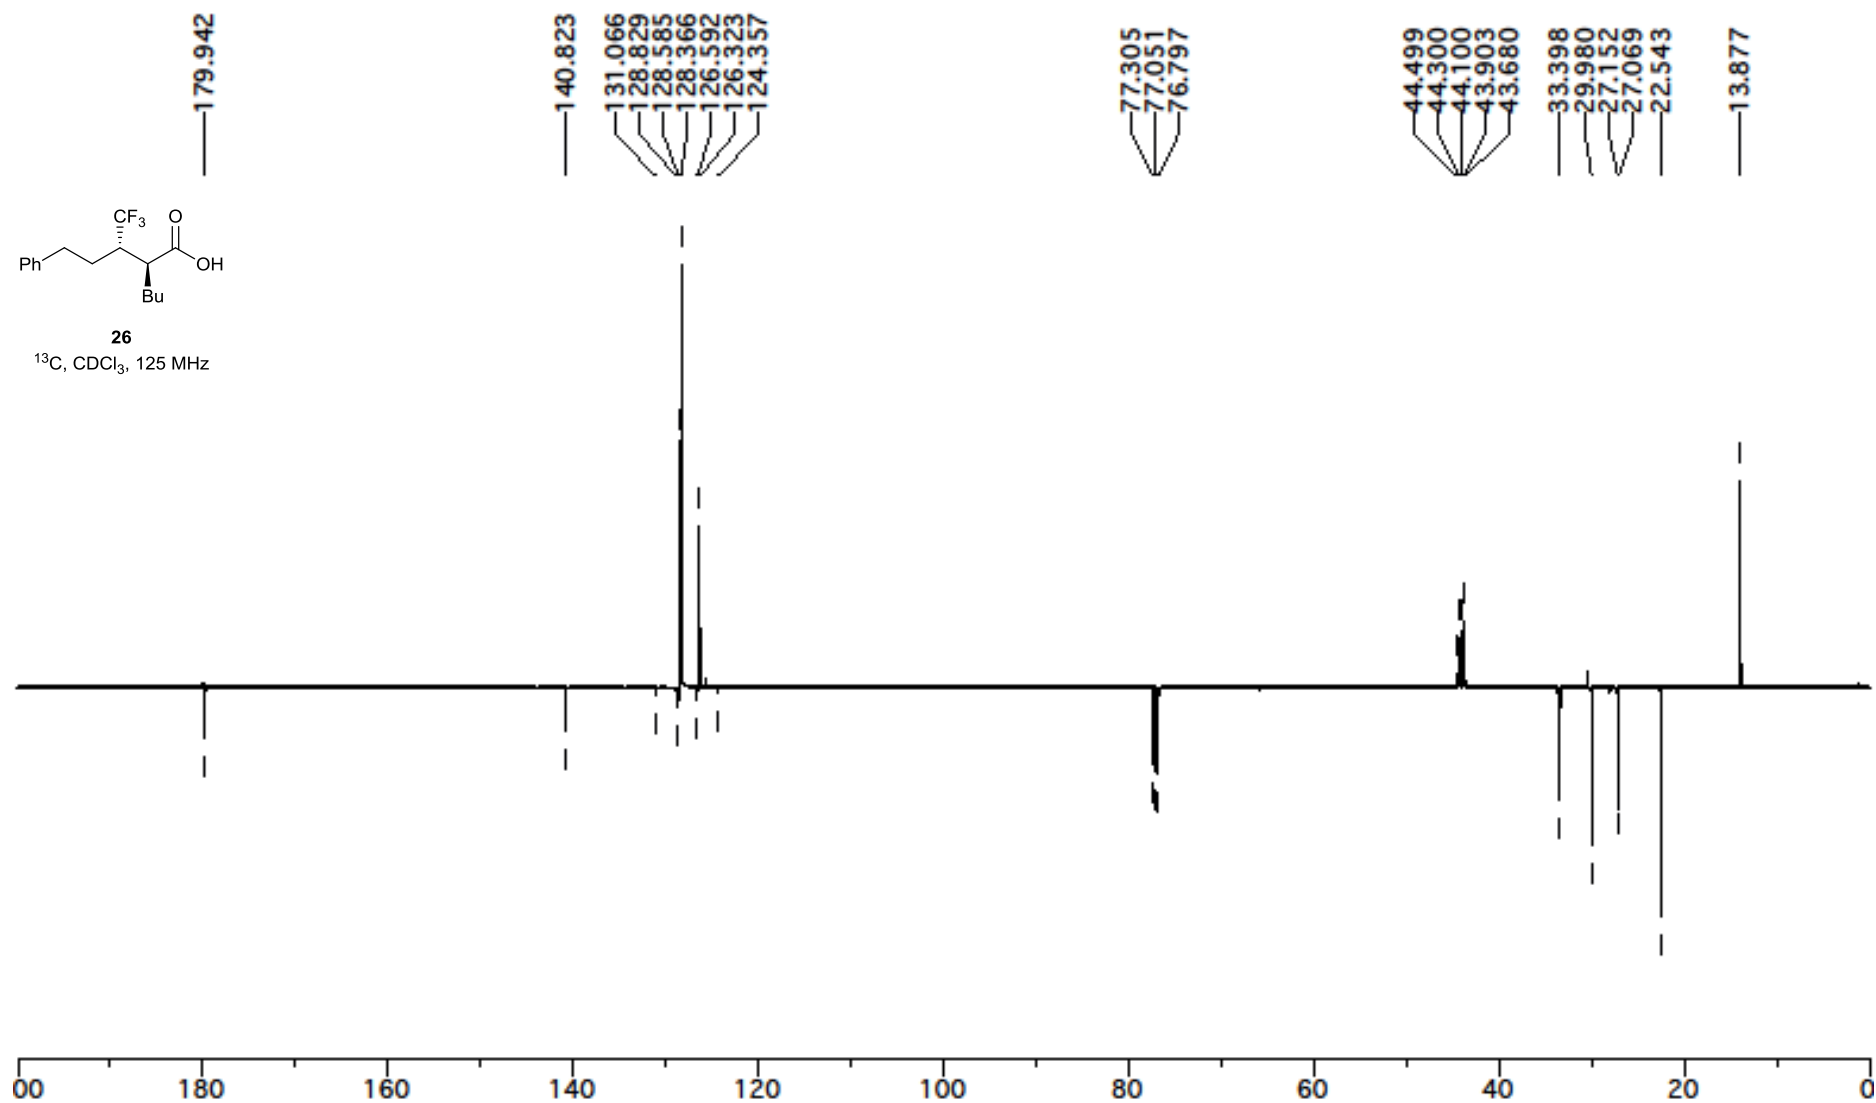

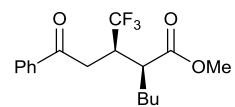

27

<sup>1</sup>H, CDCl<sub>3</sub>, 500 MHz

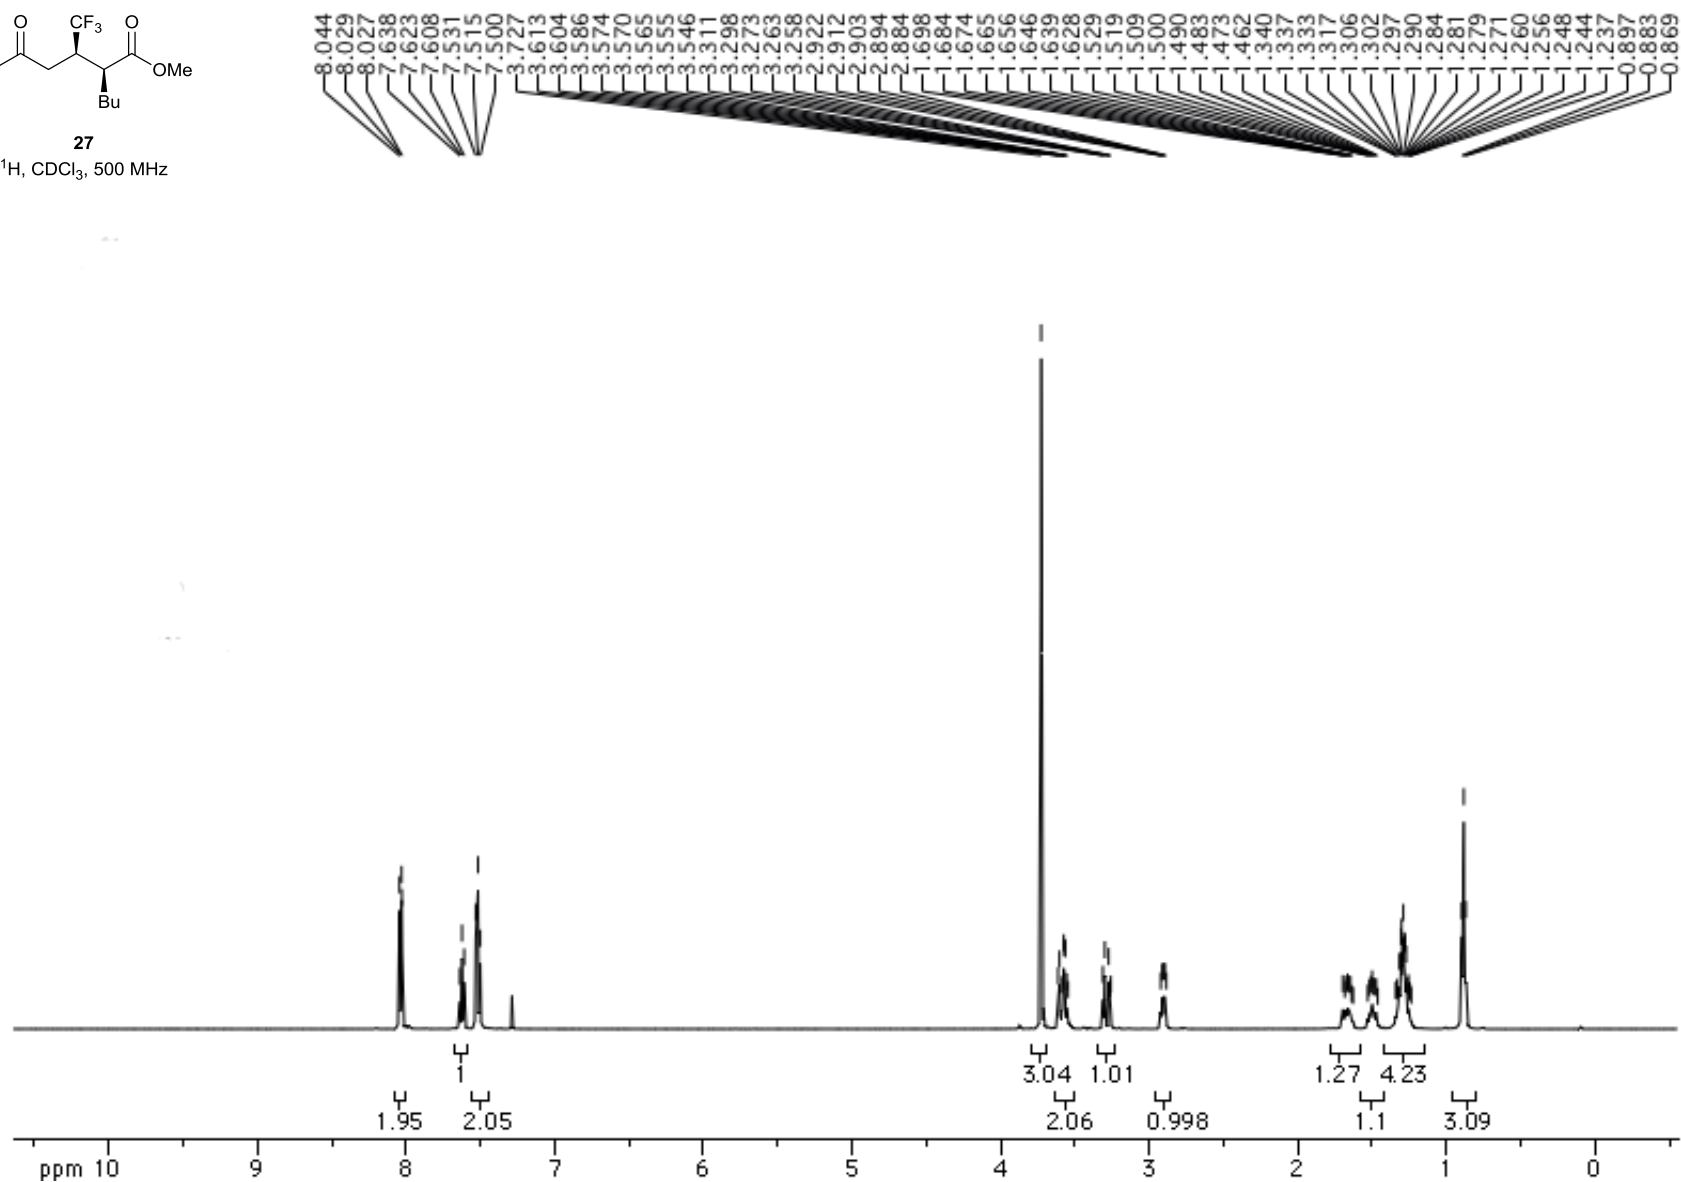

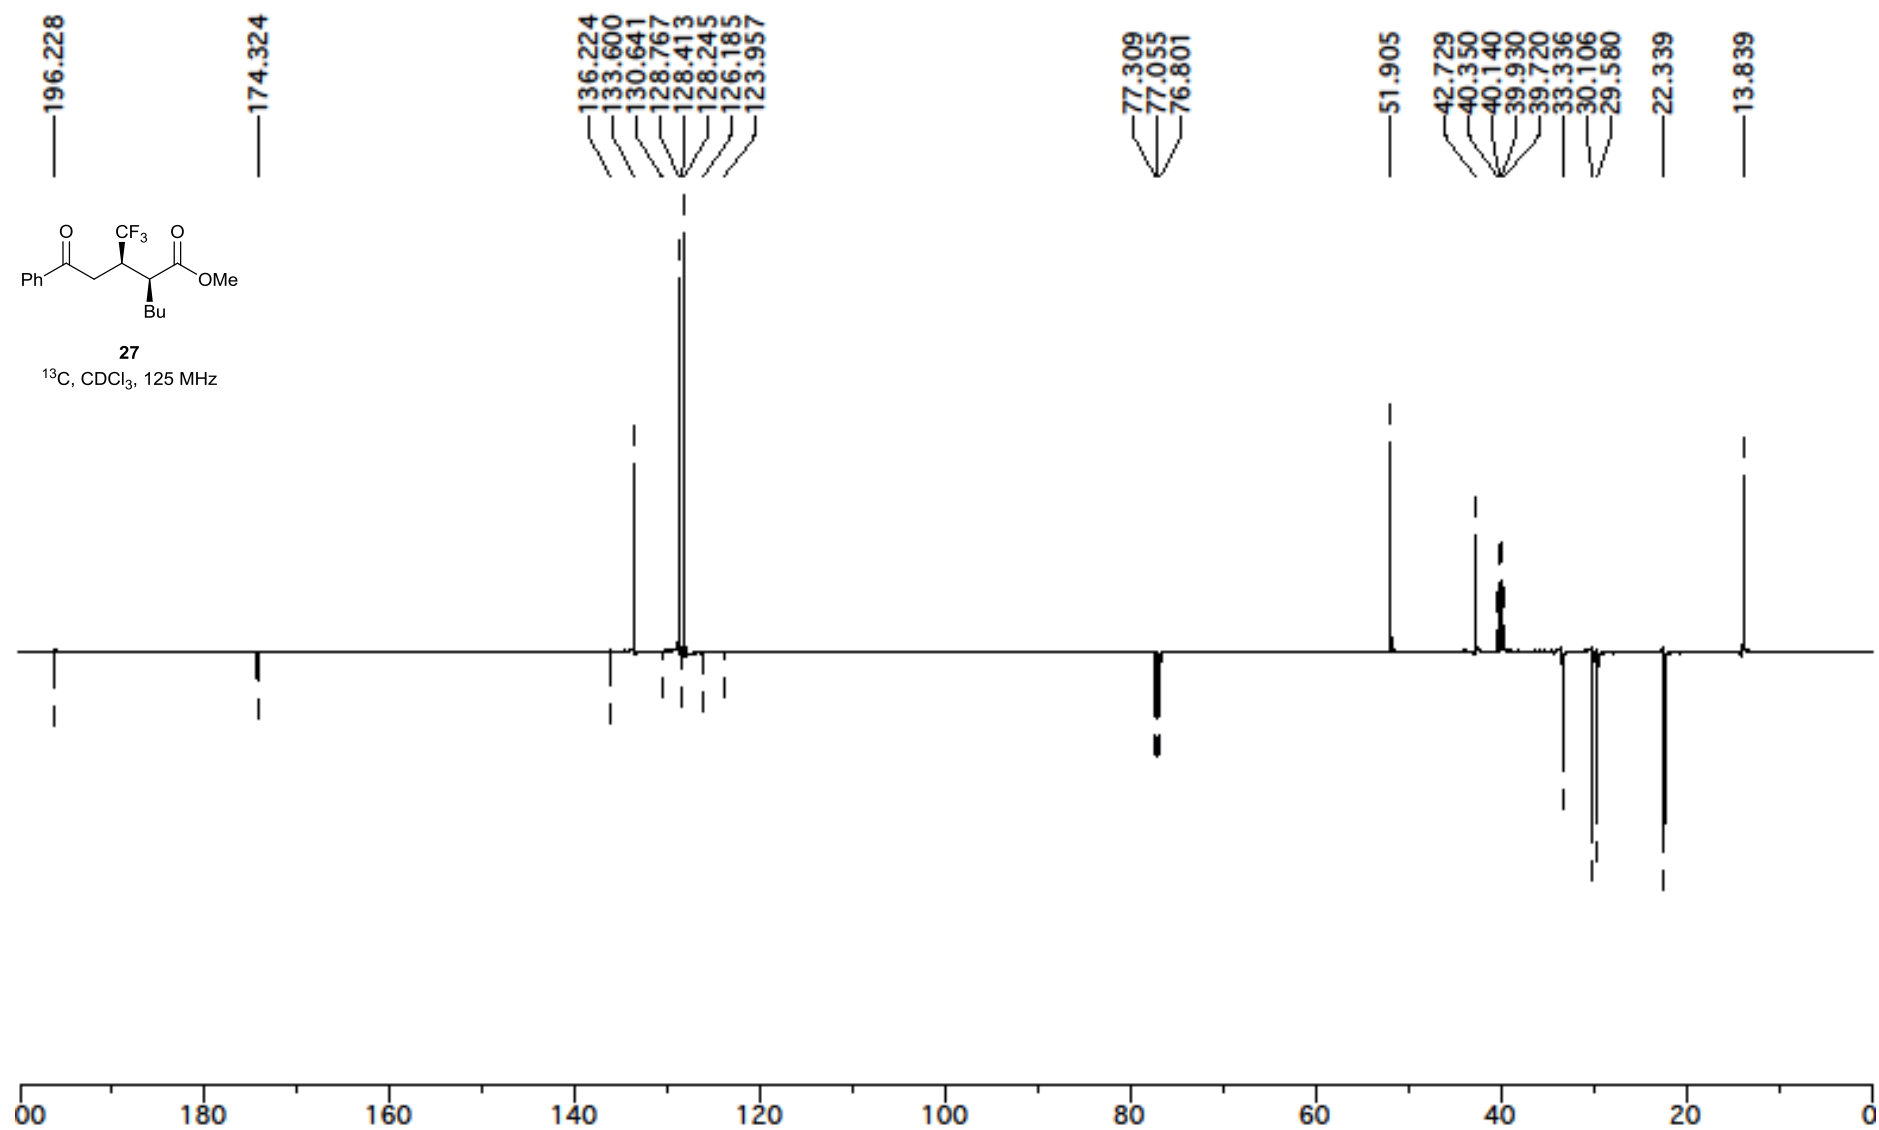

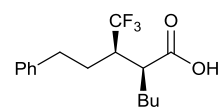

**28**

$^1\text{H}$ ,  $\text{CDCl}_3$ , 500 MHz

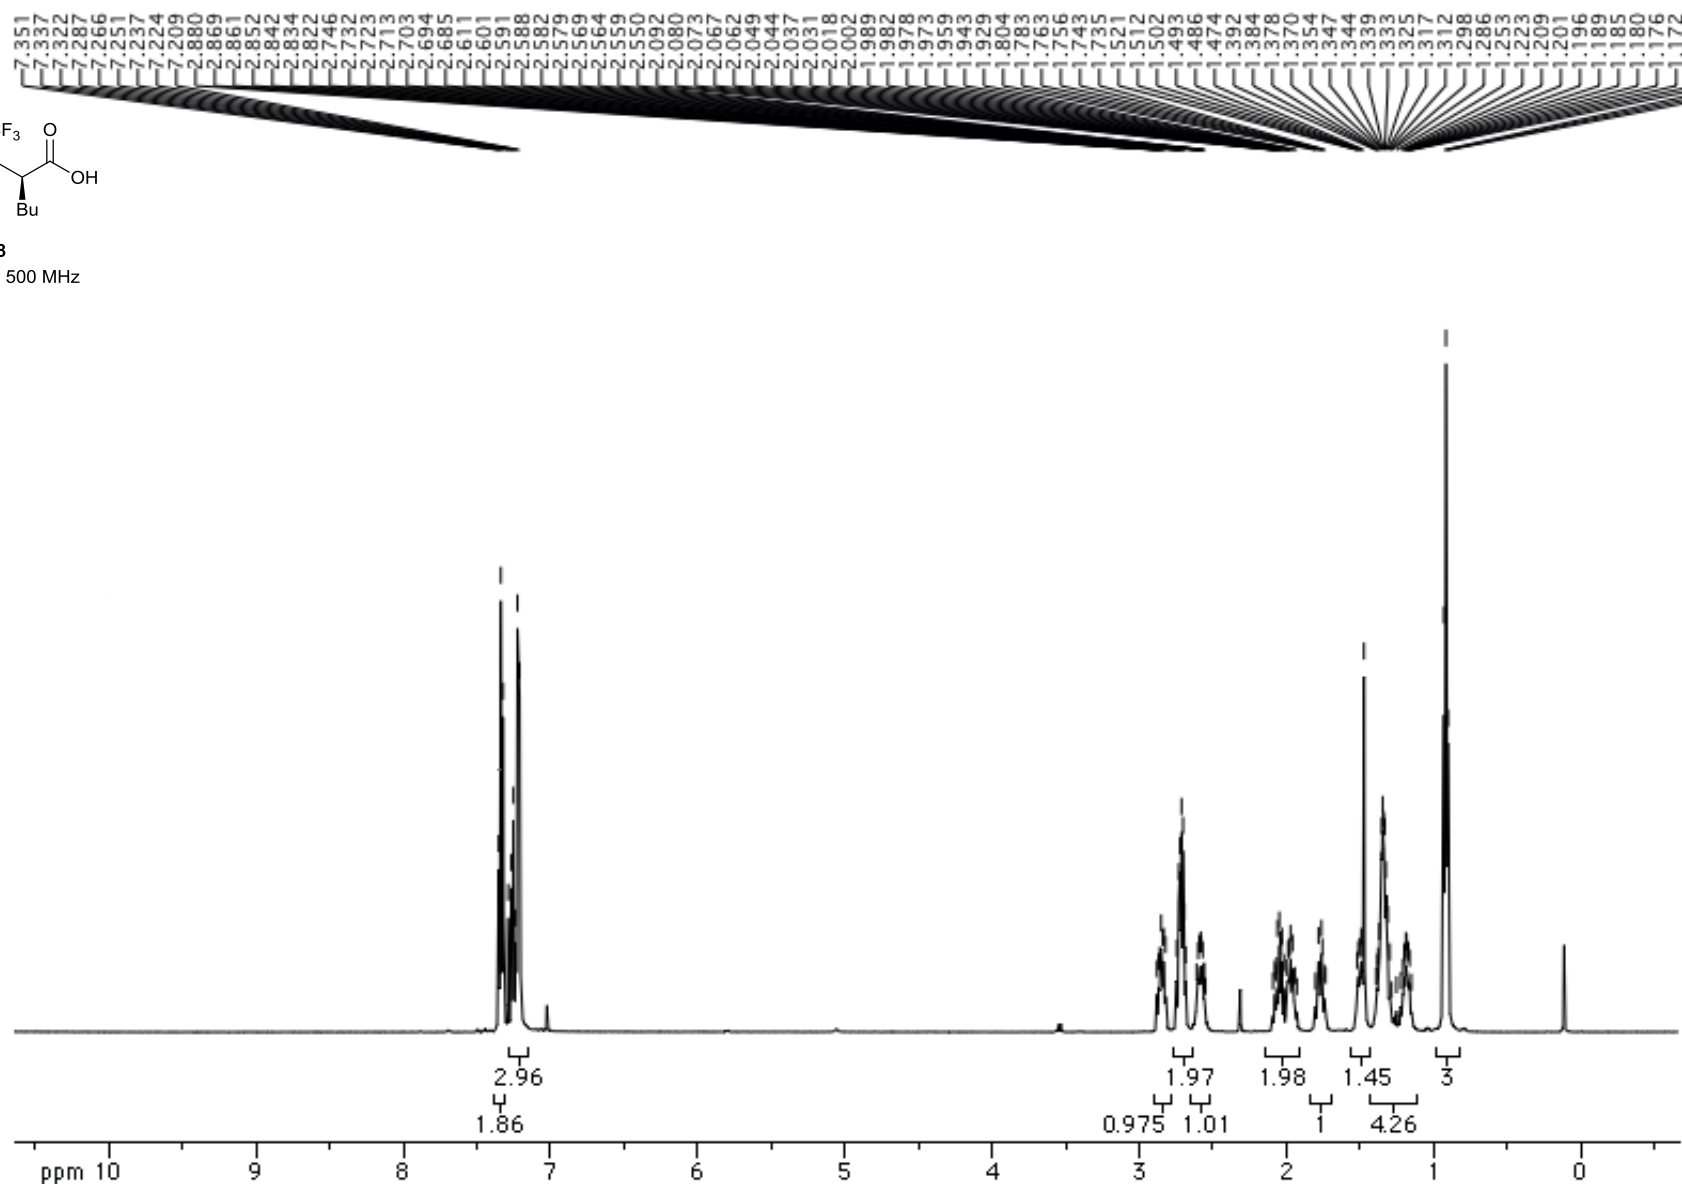



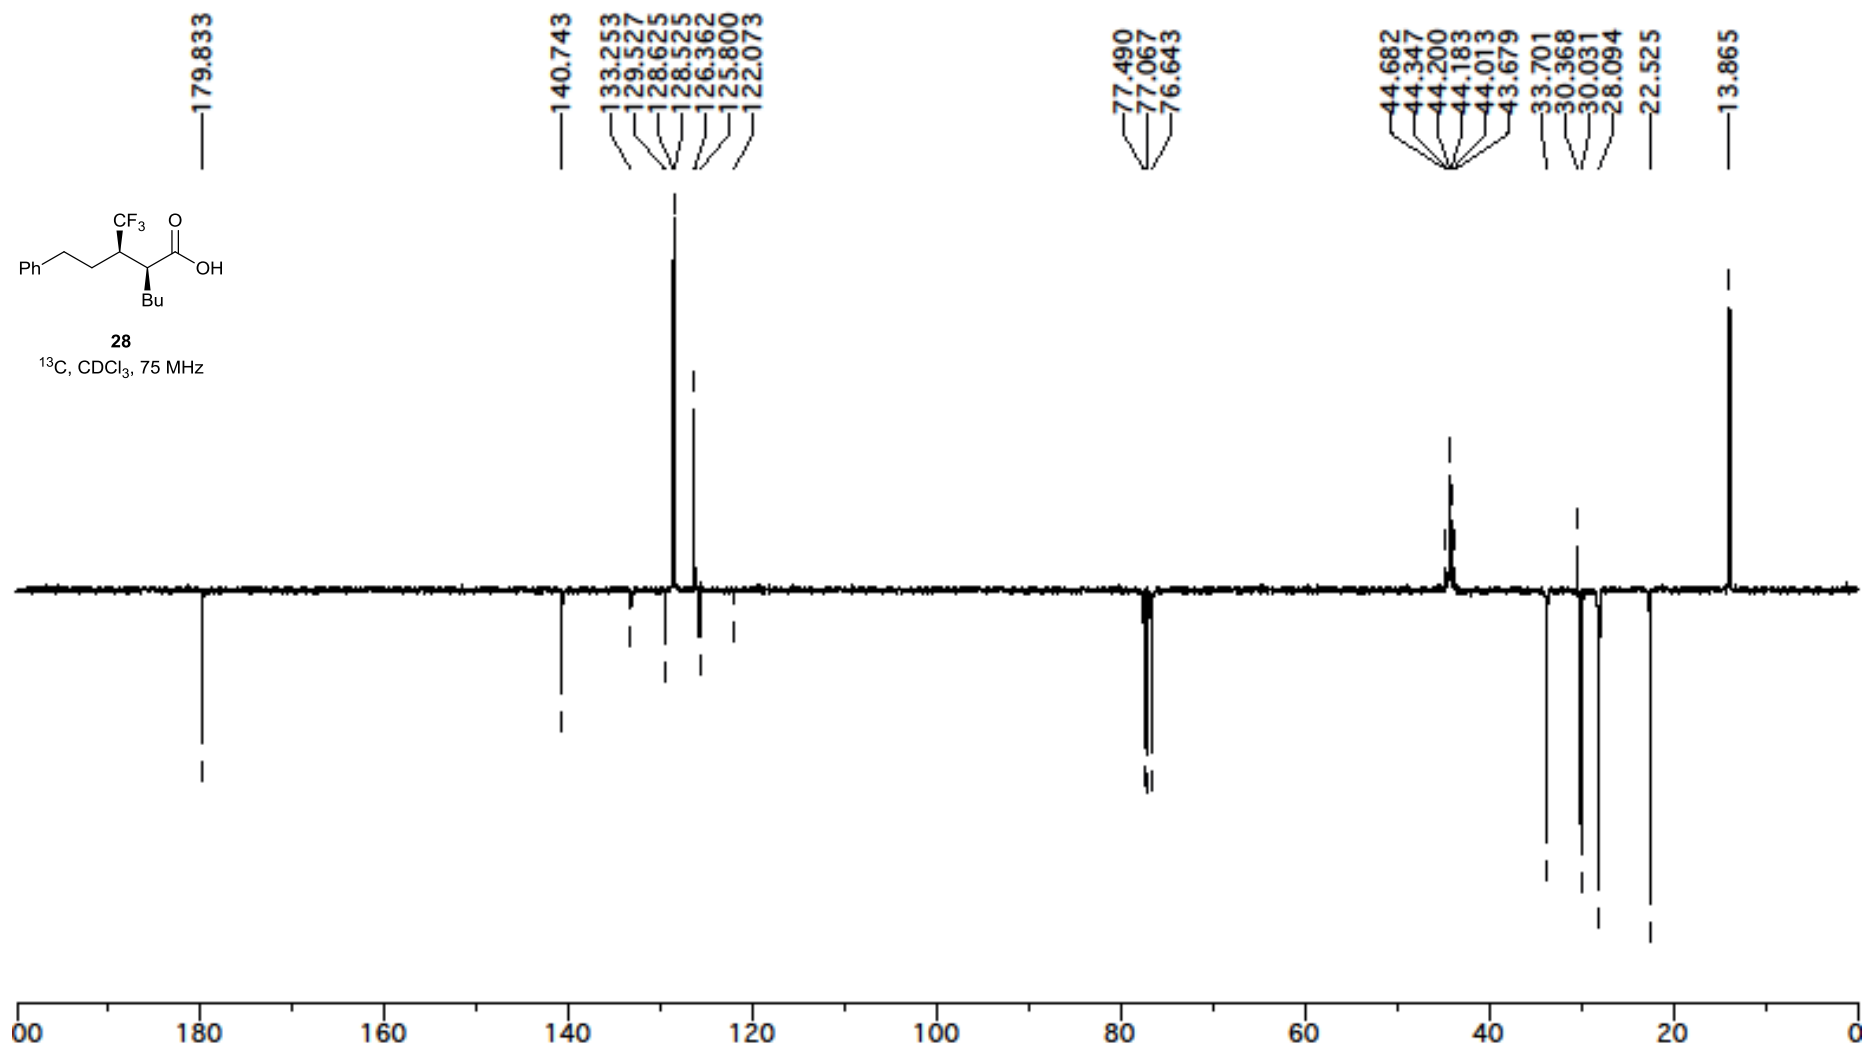

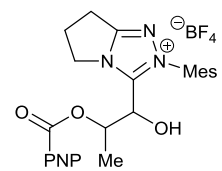

**29**

<sup>1</sup>H, CD<sub>2</sub>Cl<sub>2</sub>, 500 MHz

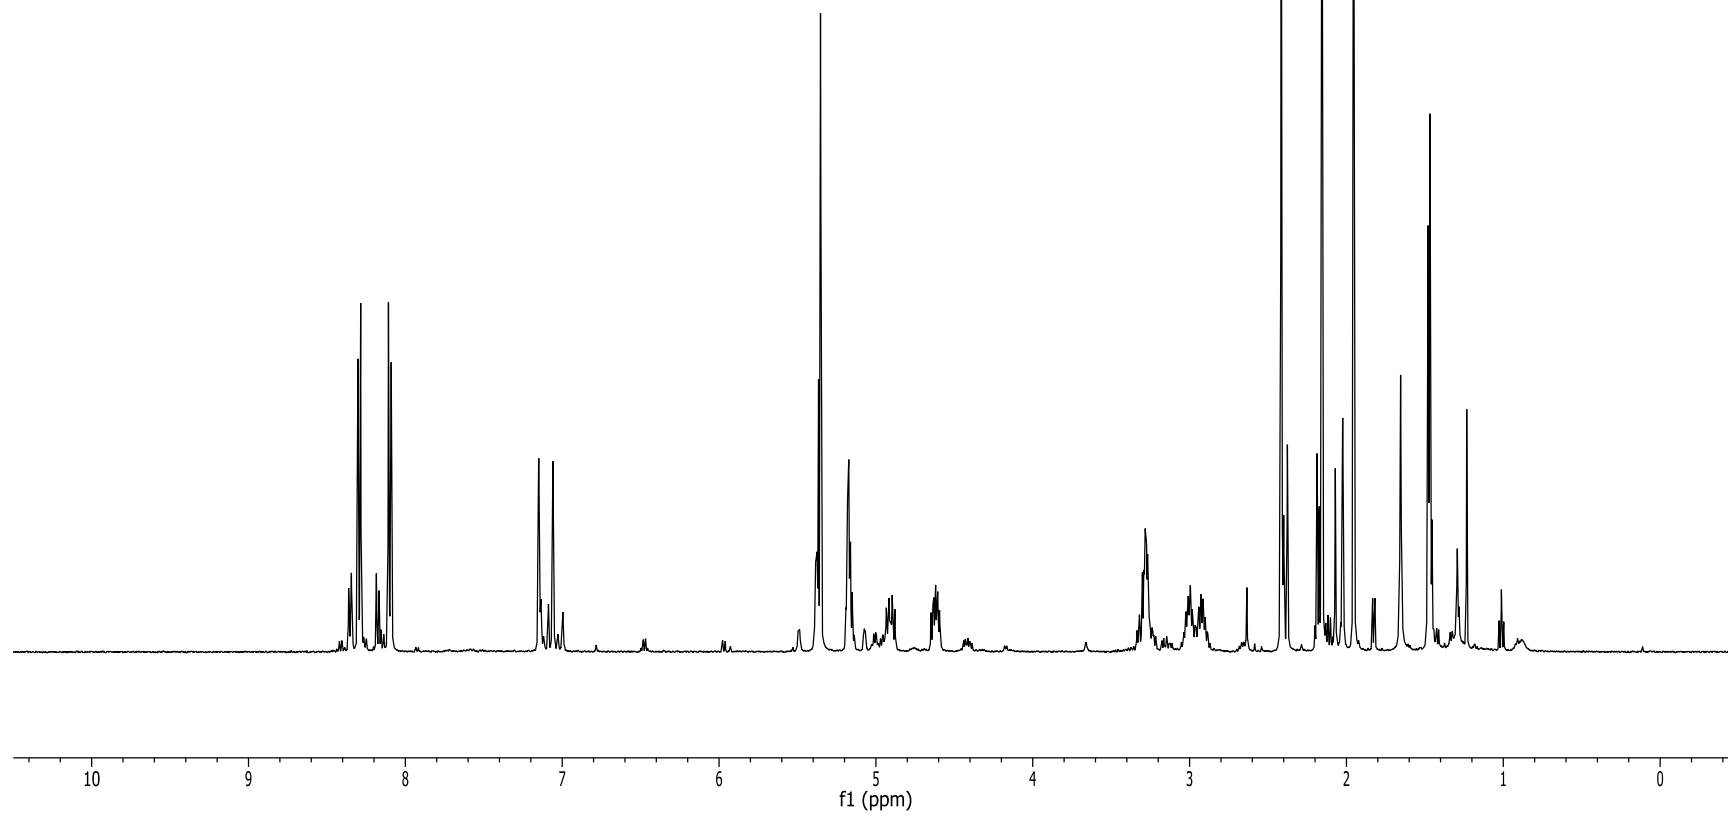

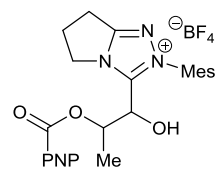

**29**

$^{13}\text{C}$ ,  $\text{CD}_2\text{Cl}_2$ , 125 MHz

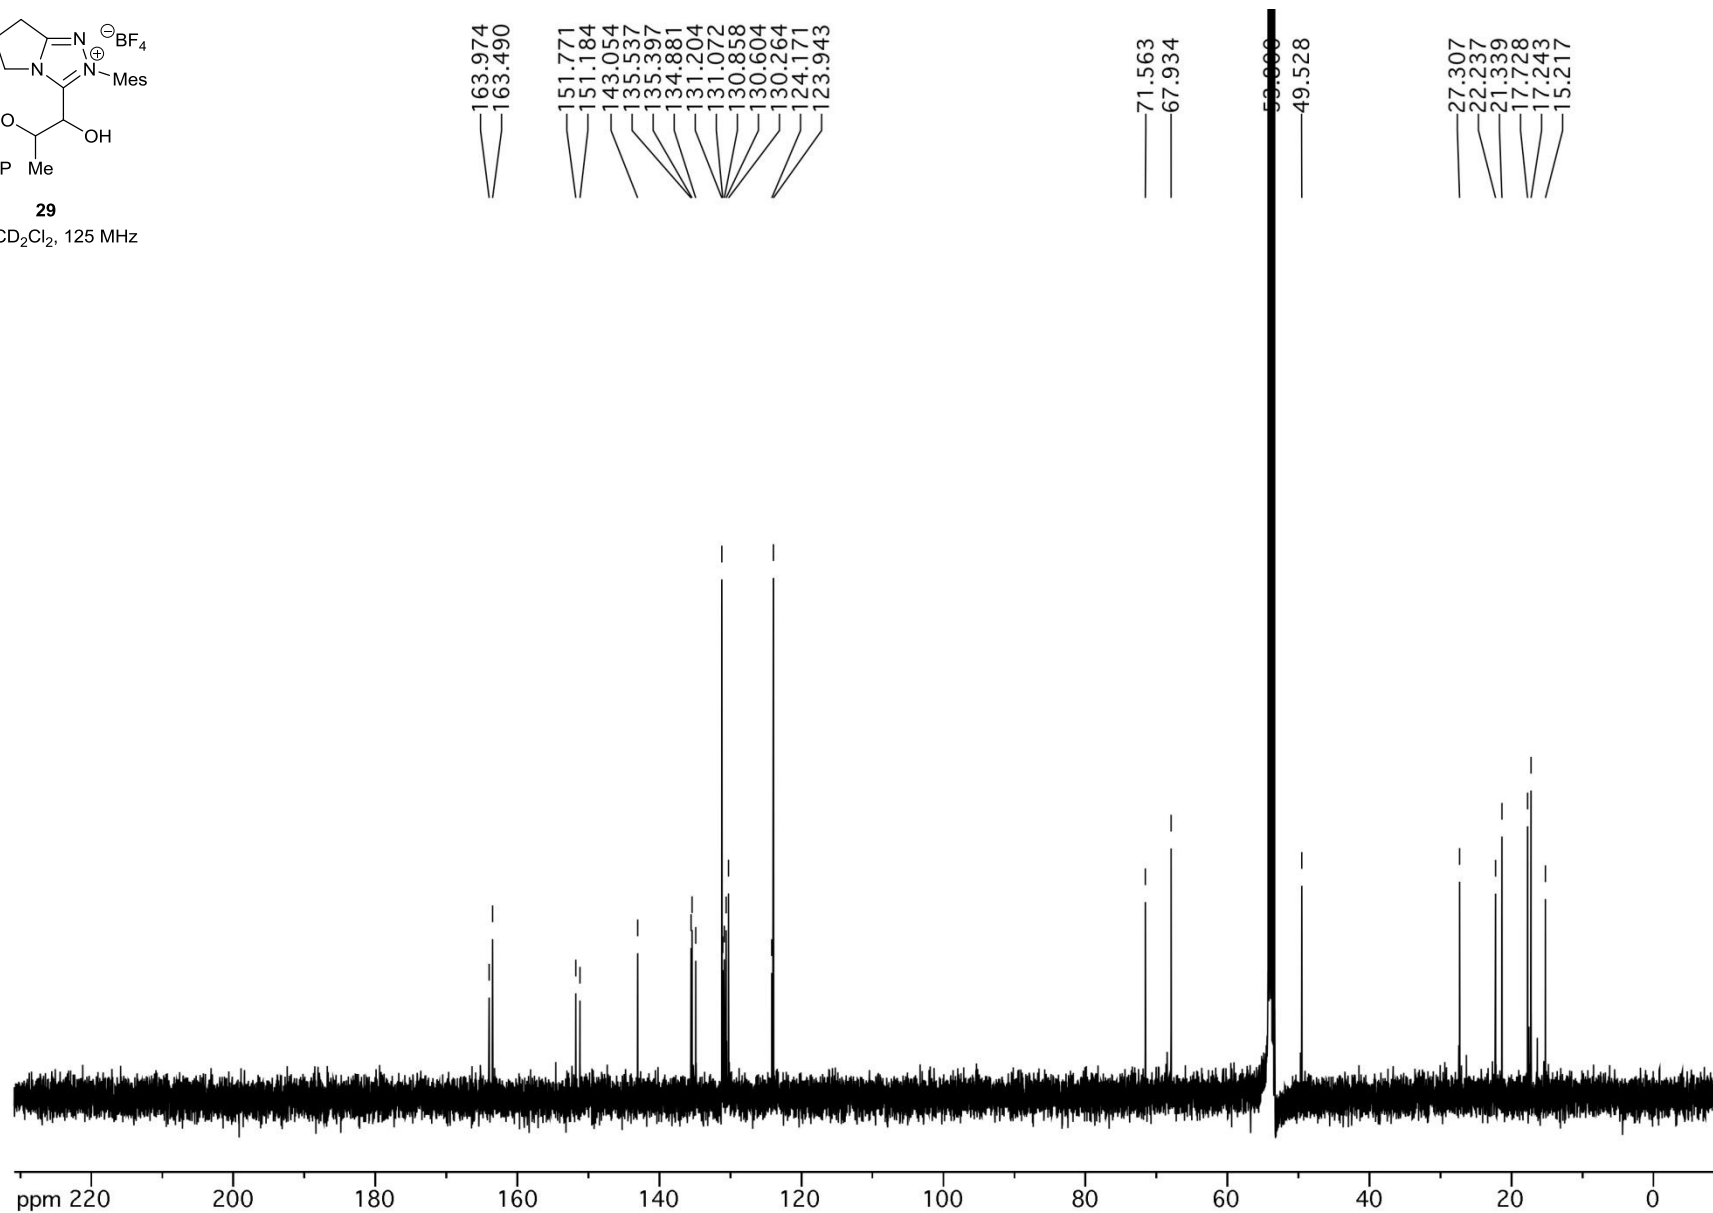

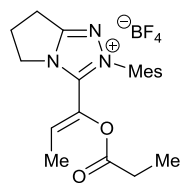

**30**

$^1\text{H}$ ,  $d_4$ -MeOD, 500 MHz

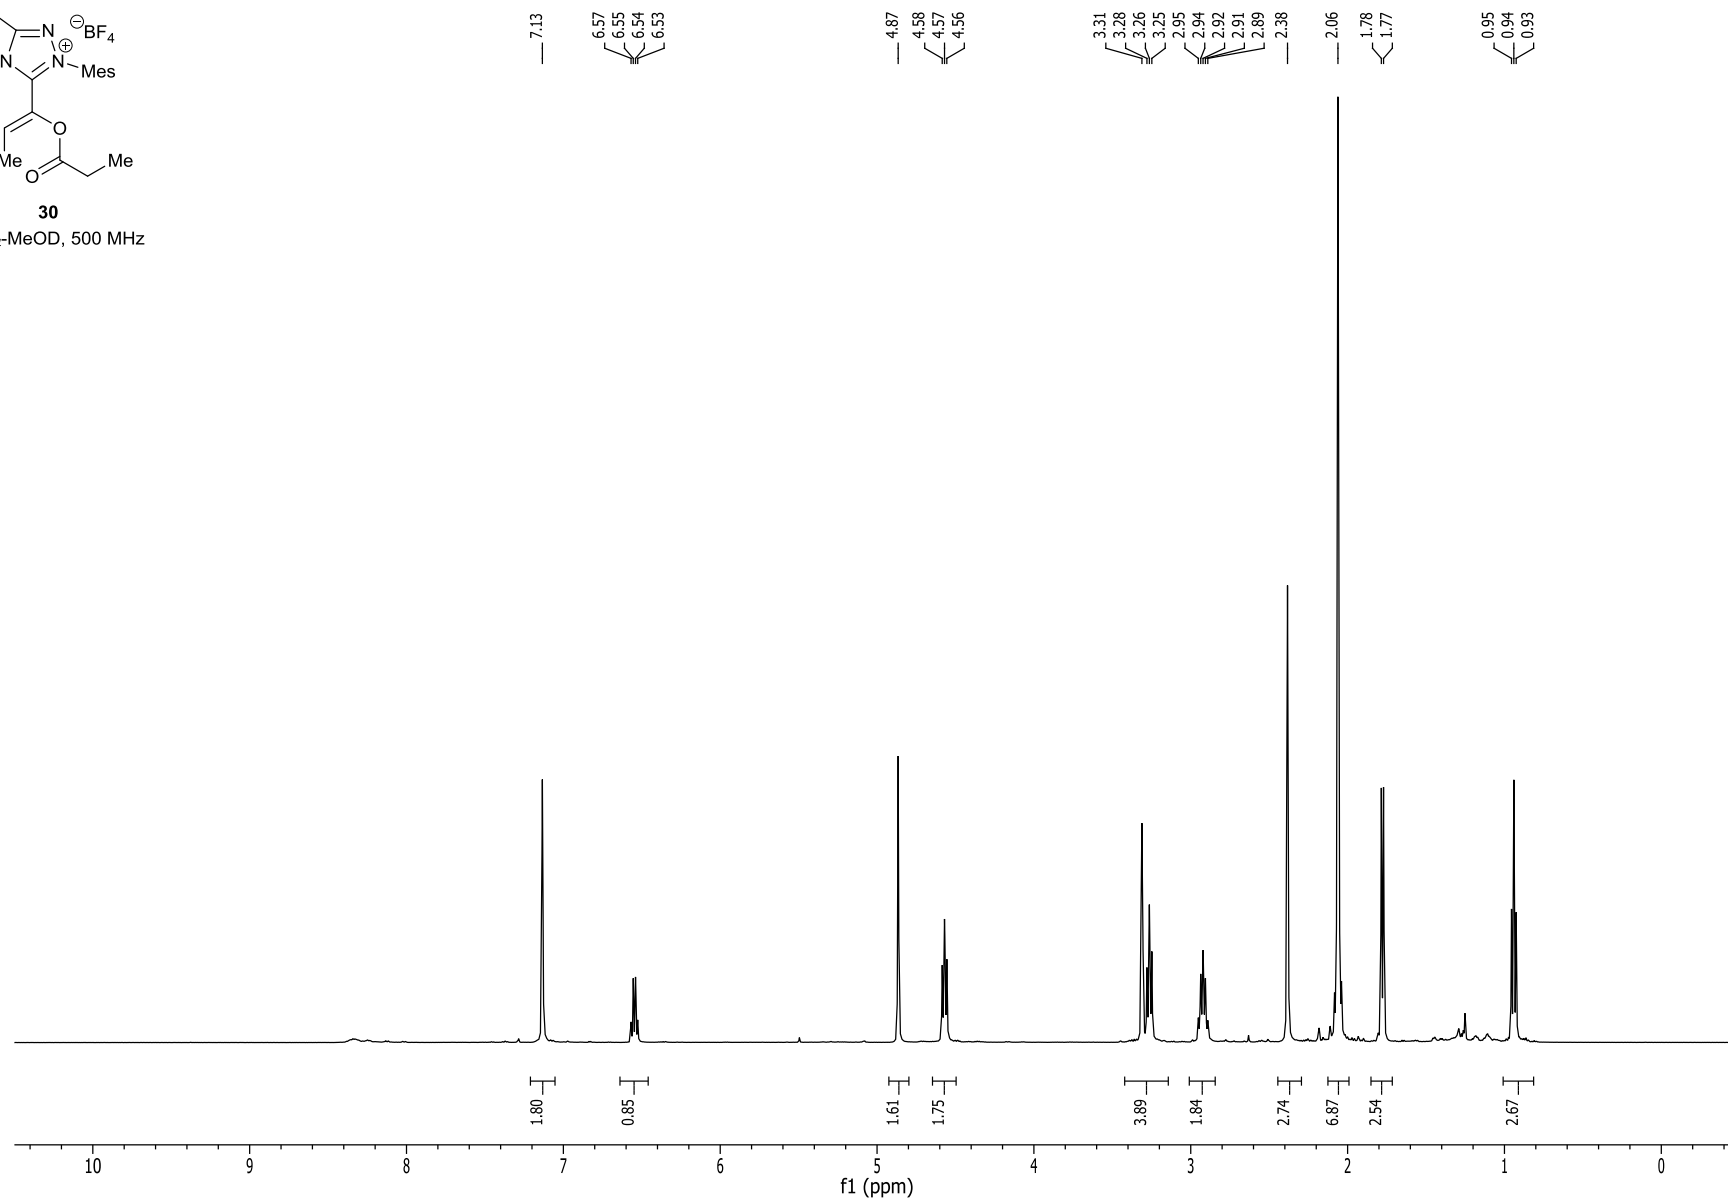

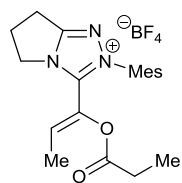

**30**

$^{13}\text{C}$ ,  $d_4$ -MeOD, 125 MHz

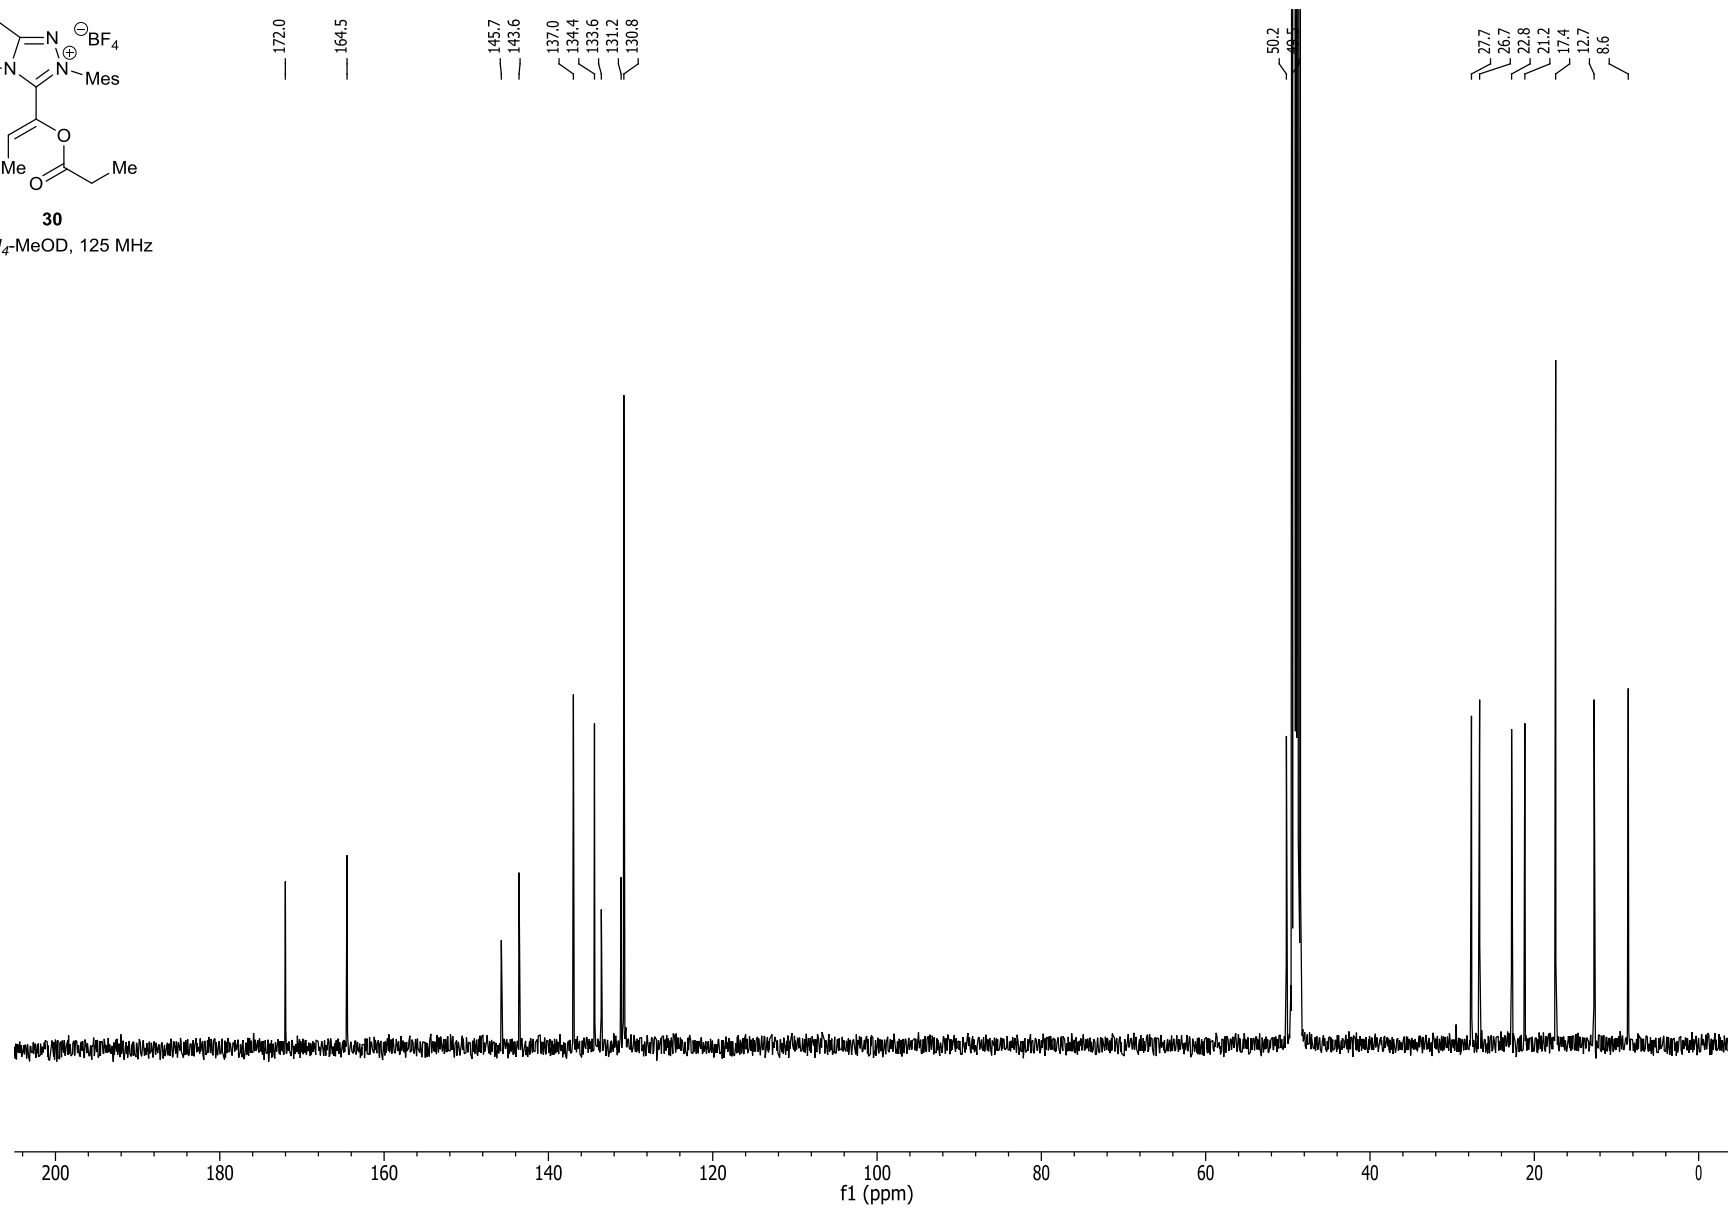

HPLC data compound **8**: Chiralcel OJ-H, 99.8:0.2 hexane : IPA, flow rate 1 mLmin<sup>-1</sup>, 254 nm, 30 °C, >99% ee.

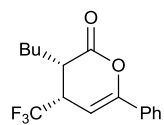

PDA Ch3 254nm

| Peak# | Ret. Time | Area    | Area%   |
|-------|-----------|---------|---------|
| 1     | 33.799    | 1139062 | 50.668  |
| 2     | 50.171    | 1109033 | 49.332  |
| Total |           | 2248095 | 100.000 |

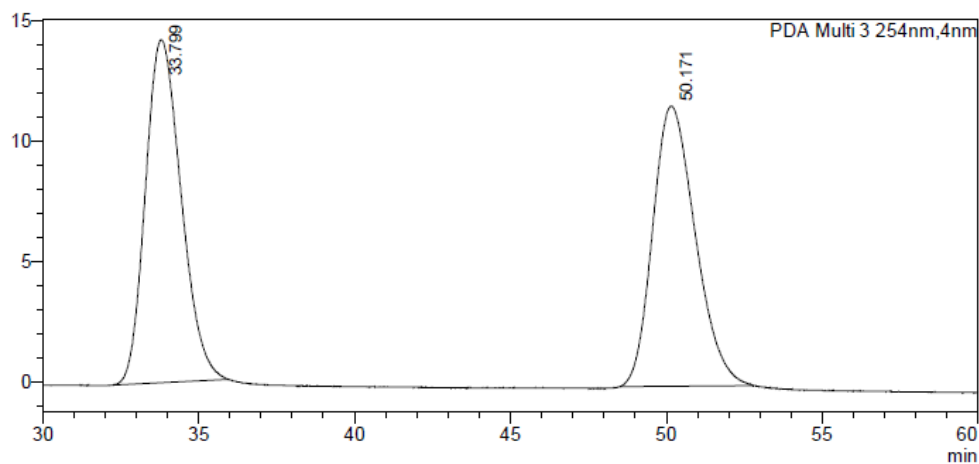

PDA Ch3 254nm

| Peak# | Ret. Time | Area     | Area%   |
|-------|-----------|----------|---------|
| 1     | 33.104    | 58274239 | 99.693  |
| 2     | 54.192    | 179380   | 0.307   |
| Total |           | 58453619 | 100.000 |

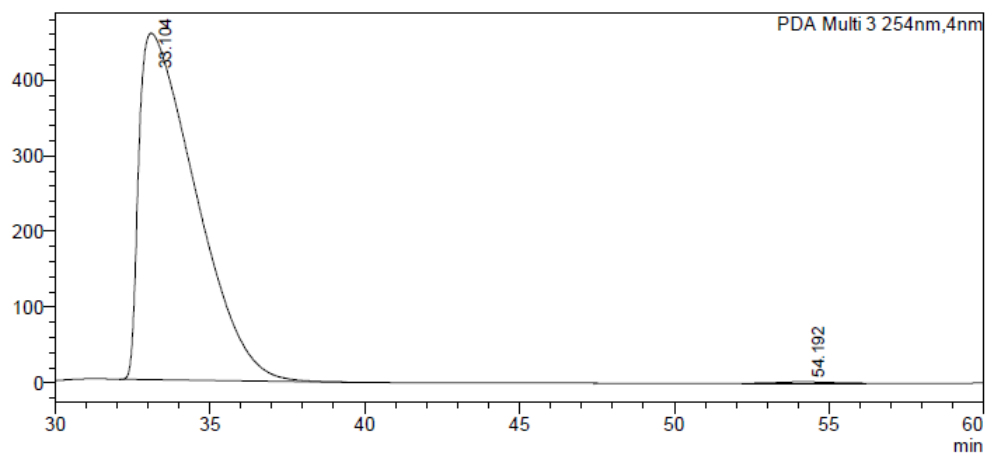

HPLC data compound **9**: Chiralpak AD-H, 95:5 hexane : IPA, flow rate 1 mLmin<sup>-1</sup>, 254 nm, 30 °C, >99% ee.

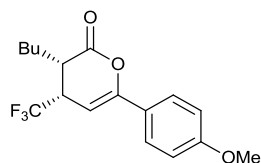

PDA Ch3 254nm

| Peak# | Ret. Time | Area    | Area%   |
|-------|-----------|---------|---------|
| 1     | 13.826    | 2198880 | 50.180  |
| 2     | 16.025    | 2183084 | 49.820  |
| Total |           | 4381964 | 100.000 |

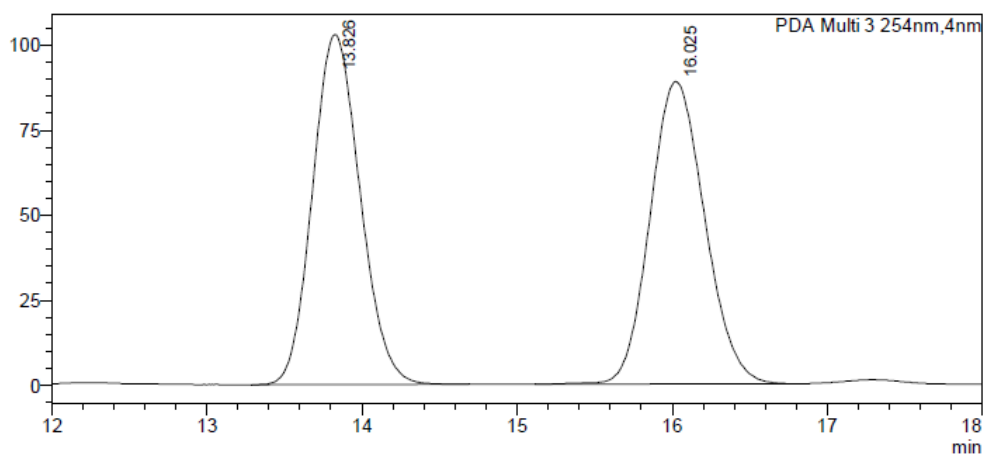

PDA Ch3 254nm

| Peak# | Ret. Time | Area    | Area%   |
|-------|-----------|---------|---------|
| 1     | 14.243    | 6808811 | 99.560  |
| 2     | 16.469    | 30082   | 0.440   |
| Total |           | 6838893 | 100.000 |

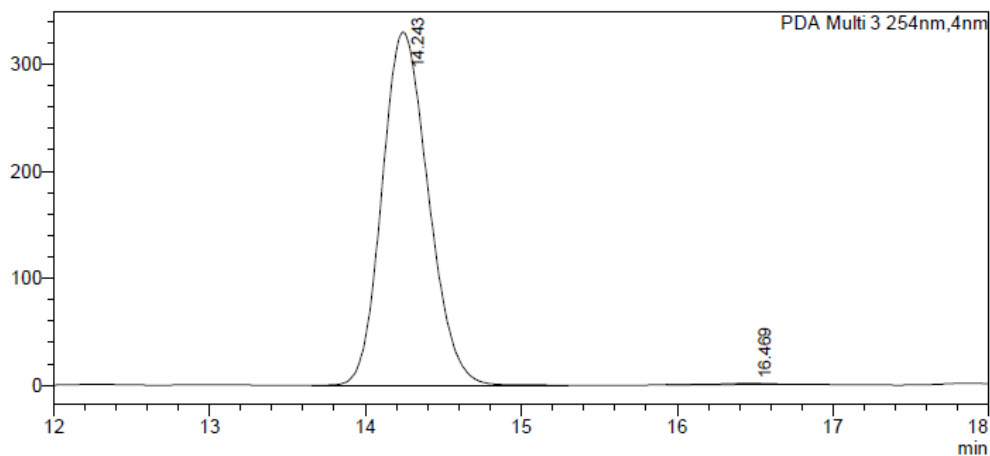

HPLC data compound **10**: Chiralpak IA, 98:2 hexane : IPA, flow rate 1 mLmin<sup>-1</sup>, 254 nm, 30 °C, 99% ee.

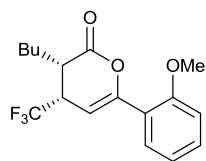

PDA Ch3 254nm

| Peak# | Ret. Time | Area     | Area%   |
|-------|-----------|----------|---------|
| 1     | 7.672     | 12954521 | 50.132  |
| 2     | 16.423    | 12886296 | 49.868  |
| Total |           | 25840818 | 100.000 |

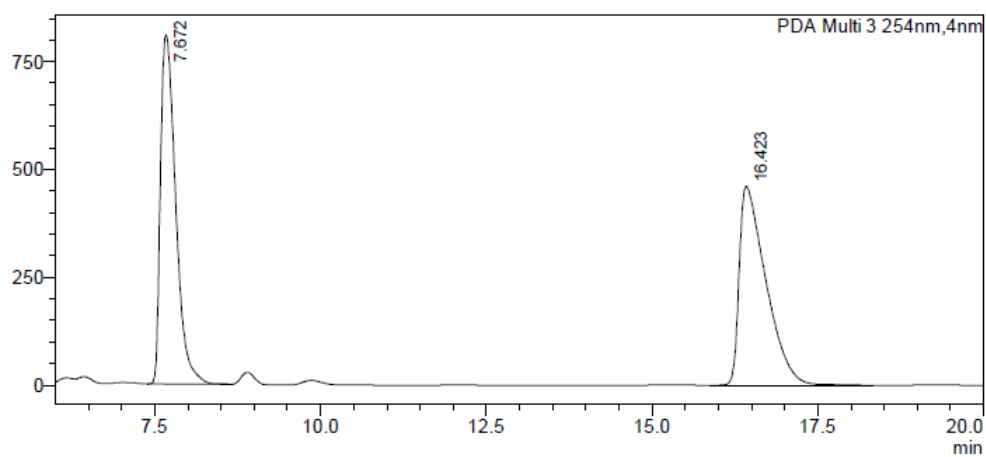

PDA Ch3 254nm

| Peak# | Ret. Time | Area     | Area%   |
|-------|-----------|----------|---------|
| 1     | 7.504     | 64466475 | 99.464  |
| 2     | 16.390    | 347554   | 0.536   |
| Total |           | 64814029 | 100.000 |

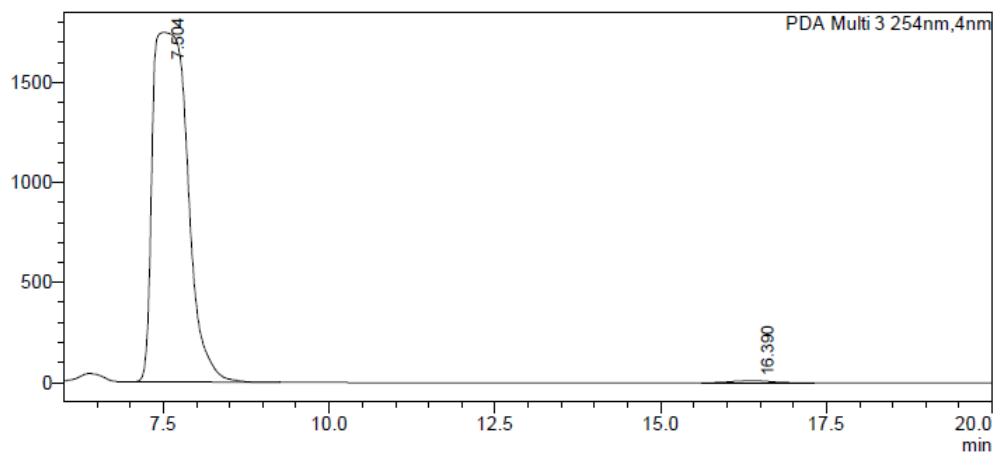



HPLC data compound **11**: Chiralpak IA, 95:5 hexane : IPA, flow rate 1 mLmin<sup>-1</sup>, 220 nm, 30 °C, >99% ee.

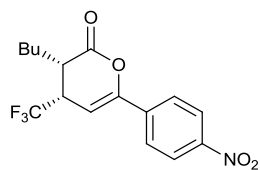

PDA Ch2 220nm

| Peak# | Ret. Time | Area     | Area%   |
|-------|-----------|----------|---------|
| 1     | 24.917    | 10538177 | 50.356  |
| 2     | 32.072    | 10389317 | 49.644  |
| Total |           | 20927495 | 100.000 |

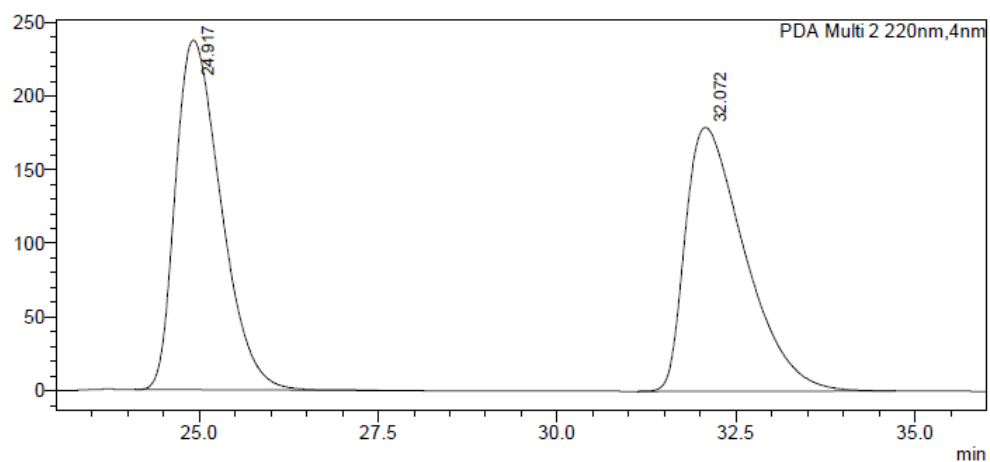

PDA Ch2 220nm

| Peak# | Ret. Time | Area     | Area%   |
|-------|-----------|----------|---------|
| 1     | 25.076    | 23027091 | 99.685  |
| 2     | 32.759    | 72715    | 0.315   |
| Total |           | 23099806 | 100.000 |

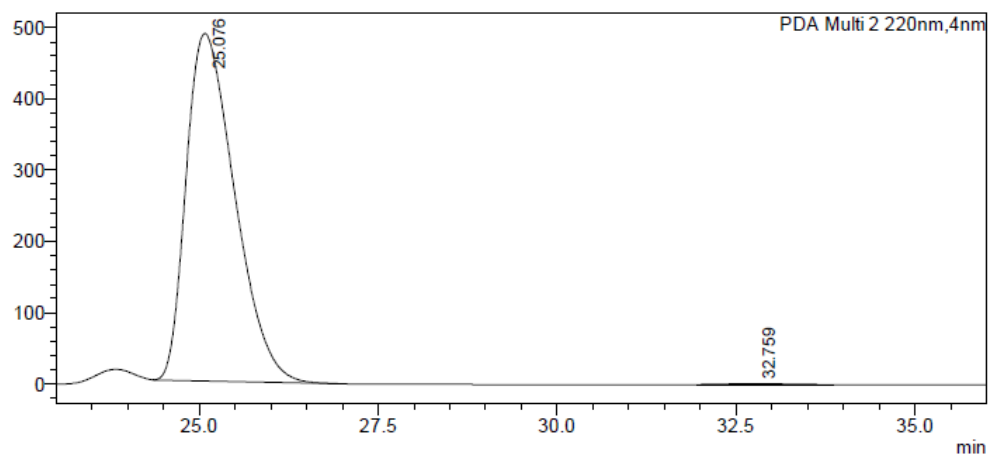

HPLC data compound **12**: Chiralpak IB, 99.1 hexane : IPA, flow rate 1 mLmin<sup>-1</sup>, 254 nm, 40 °C, >99% ee.

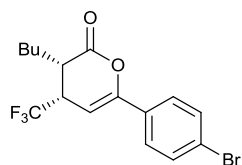

PDA Ch3 254nm

| Peak# | Ret. Time | Area      | Area%   |
|-------|-----------|-----------|---------|
| 1     | 8.434     | 56533784  | 48.641  |
| 2     | 10.441    | 59693008  | 51.359  |
| Total |           | 116226792 | 100.000 |

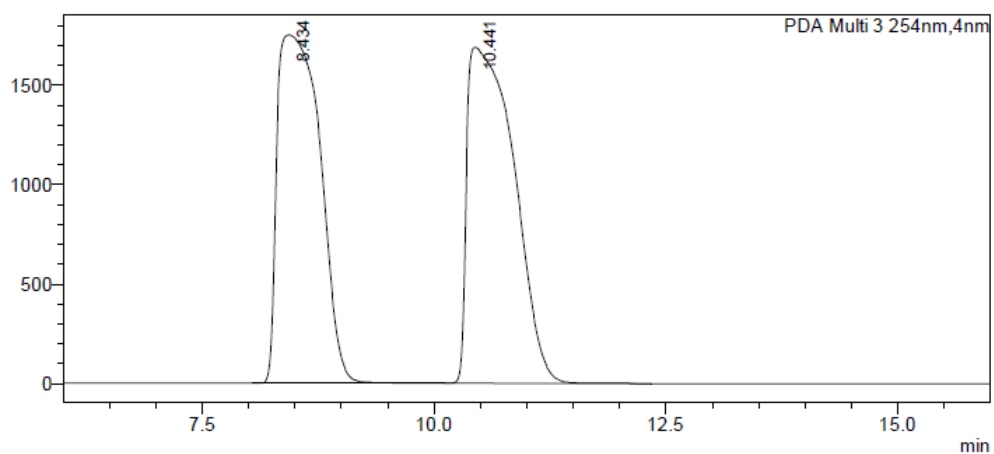

PDA Ch3 254nm

| Peak# | Ret. Time | Area     | Area%   |
|-------|-----------|----------|---------|
| 1     | 8.304     | 14315138 | 99.940  |
| 2     | 10.342    | 8648     | 0.060   |
| Total |           | 14323787 | 100.000 |

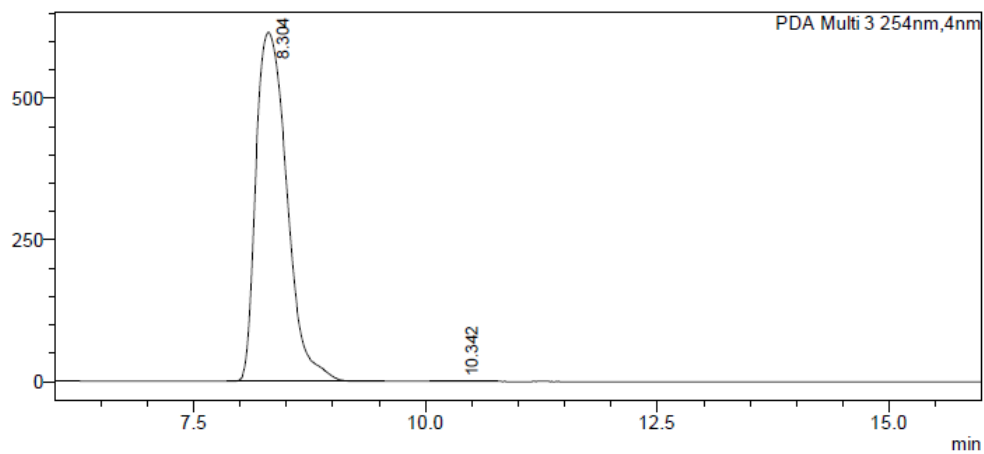

HPLC data compound **13**: Chiralpak IA, 90:10 hexane : IPA, flow rate 1 mLmin<sup>-1</sup>, 254 nm, 30 °C, >99% ee.

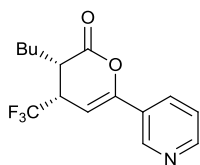

PDA Ch3 254nm

| Peak# | Ret. Time | Area     | Area%   |
|-------|-----------|----------|---------|
| 1     | 9.479     | 25807644 | 50.489  |
| 2     | 13.554    | 25308145 | 49.511  |
| Total |           | 51115789 | 100.000 |

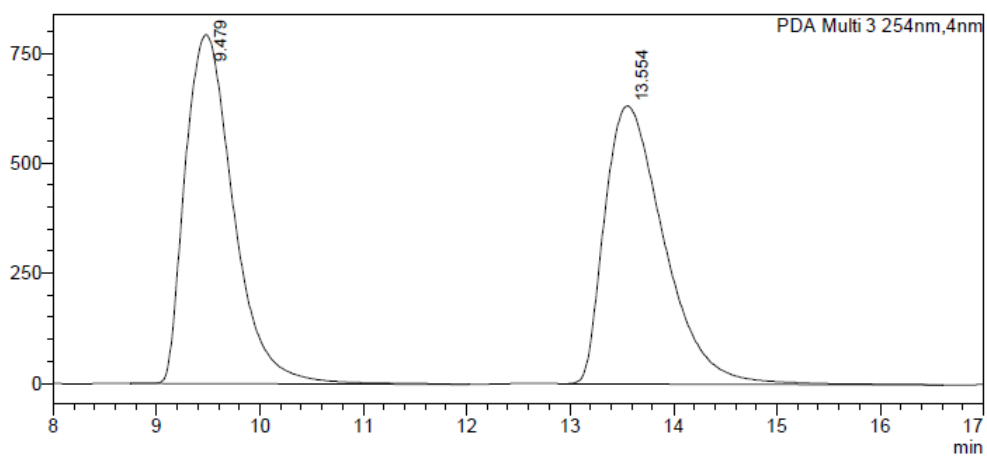

PDA Ch3 254nm

| Peak# | Ret. Time | Area     | Area%   |
|-------|-----------|----------|---------|
| 1     | 9.402     | 36878709 | 99.708  |
| 2     | 13.889    | 107885   | 0.292   |
| Total |           | 36986594 | 100.000 |

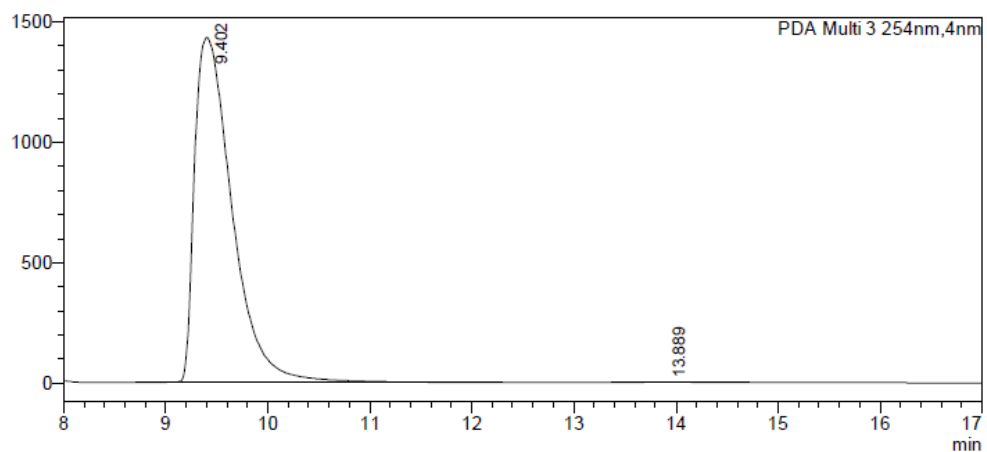

HPLC data compound **14**: Chiralpak AD-H, 98:2 hexane : IPA, flow rate 1 mLmin<sup>-1</sup>, 254 nm, 30 °C, >99% ee.

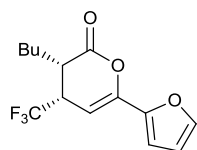

PDA Ch3 254nm

| Peak# | Ret. Time | Area     | Area%   |
|-------|-----------|----------|---------|
| 1     | 7.309     | 14793145 | 50.108  |
| 2     | 10.211    | 14729204 | 49.892  |
| Total |           | 29522349 | 100.000 |

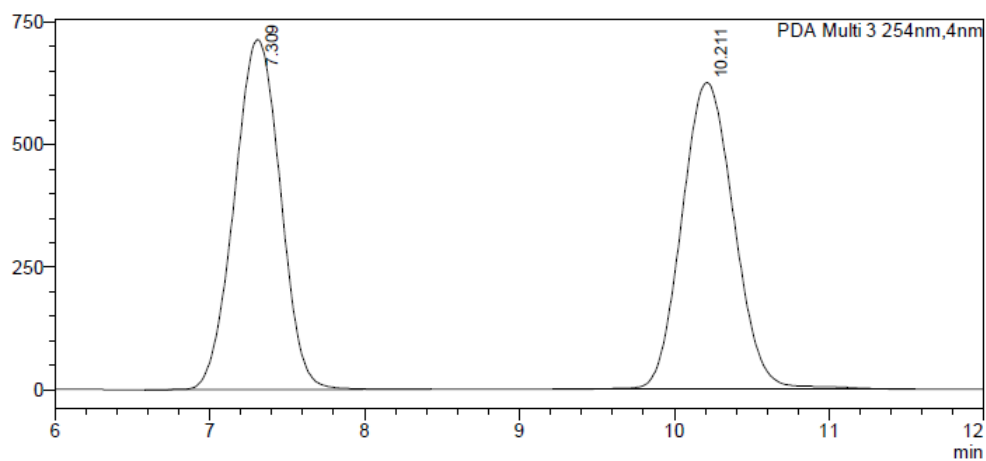

PDA Ch3 254nm

| Peak# | Ret. Time | Area     | Area%   |
|-------|-----------|----------|---------|
| 1     | 7.410     | 12357140 | 99.621  |
| 2     | 10.358    | 47049    | 0.379   |
| Total |           | 12404189 | 100.000 |

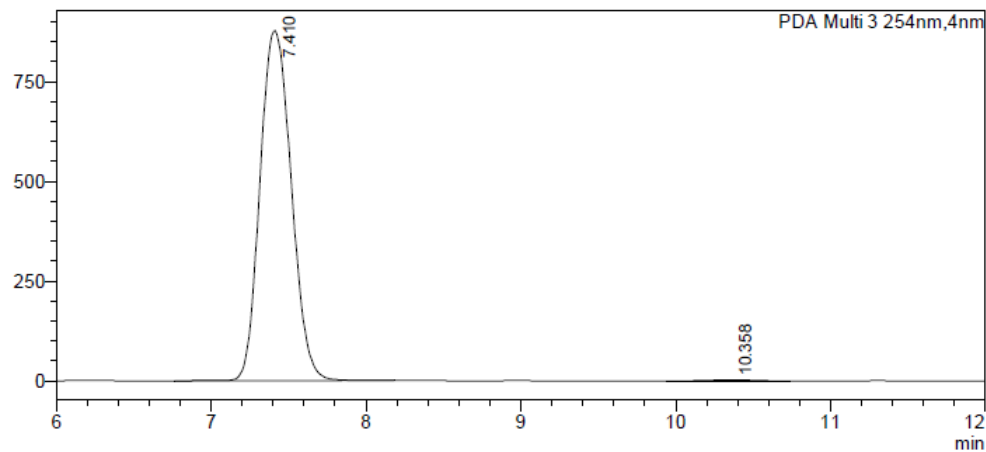

HPLC data compound **15**: Chiralcel OD-H, 99:1 hexane : IPA, flow rate 1 mLmin<sup>-1</sup>, 254 nm, 30 °C, >99% ee.

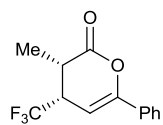

PDA Ch3 254nm

| Peak# | Ret. Time | Area     | Area%   |
|-------|-----------|----------|---------|
| 1     | 24.714    | 12216498 | 51.292  |
| 2     | 41.340    | 11601118 | 48.708  |
| Total |           | 23817616 | 100.000 |

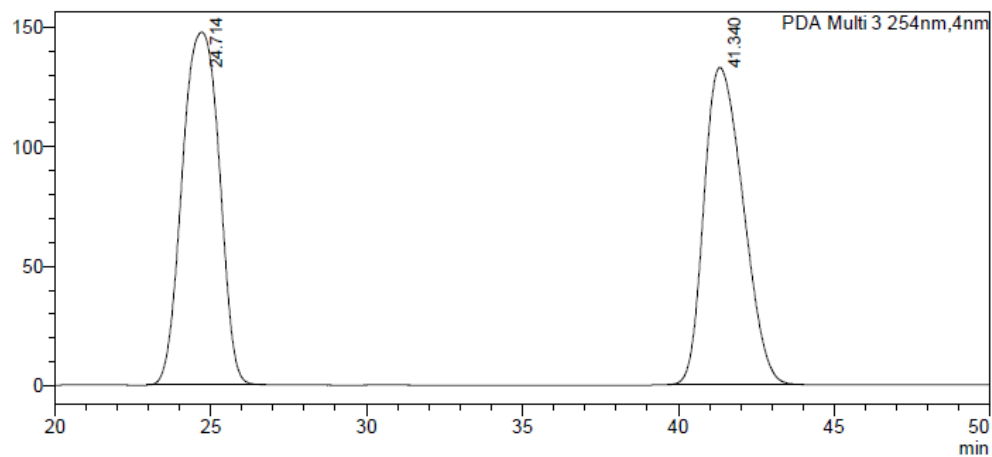

PDA Ch3 254nm

| Peak# | Ret. Time | Area     | Area%   |
|-------|-----------|----------|---------|
| 1     | 23.974    | 26199388 | 99.622  |
| 2     | 41.289    | 99427    | 0.378   |
| Total |           | 26298815 | 100.000 |

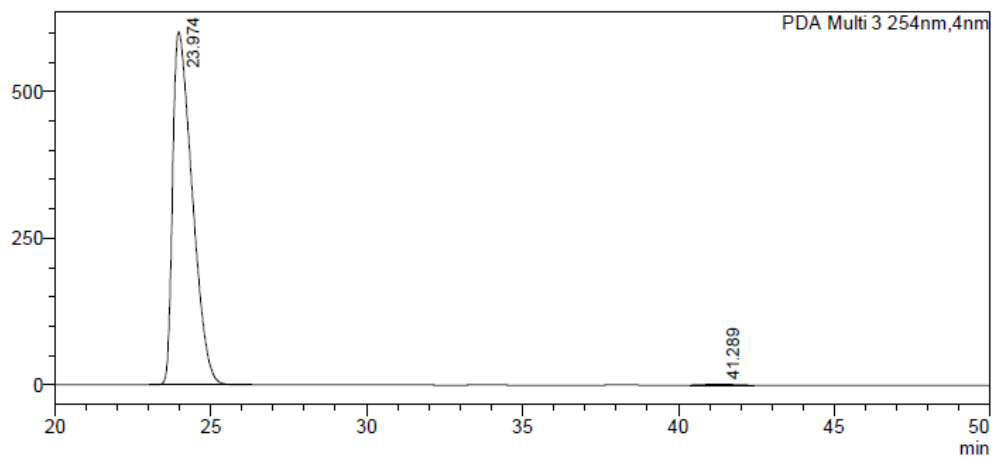

HPLC data compound **16**: Chiralcel OJ-H, 99.8:0.2 hexane : IPA, flow rate 1 mLmin<sup>-1</sup>, 254 nm, 30 °C, >99% ee.

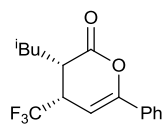

PDA Ch3 254nm

| Peak# | Ret. Time | Area     | Area%   |
|-------|-----------|----------|---------|
| 1     | 23.238    | 6966812  | 51.851  |
| 2     | 35.230    | 6469286  | 48.149  |
| Total |           | 13436098 | 100.000 |

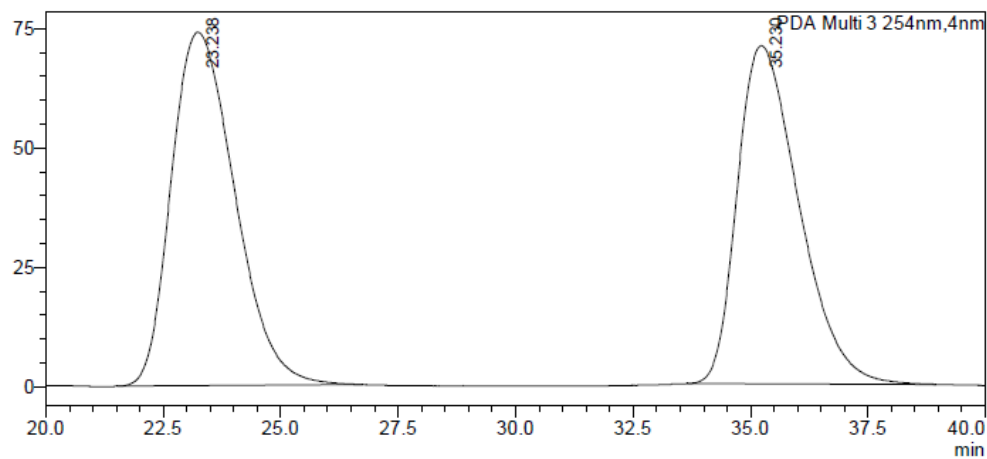

PDA Ch3 254nm

| Peak# | Ret. Time | Area    | Area%   |
|-------|-----------|---------|---------|
| 1     | 23.087    | 7700496 | 99.791  |
| 2     | 35.420    | 16110   | 0.209   |
| Total |           | 7716605 | 100.000 |

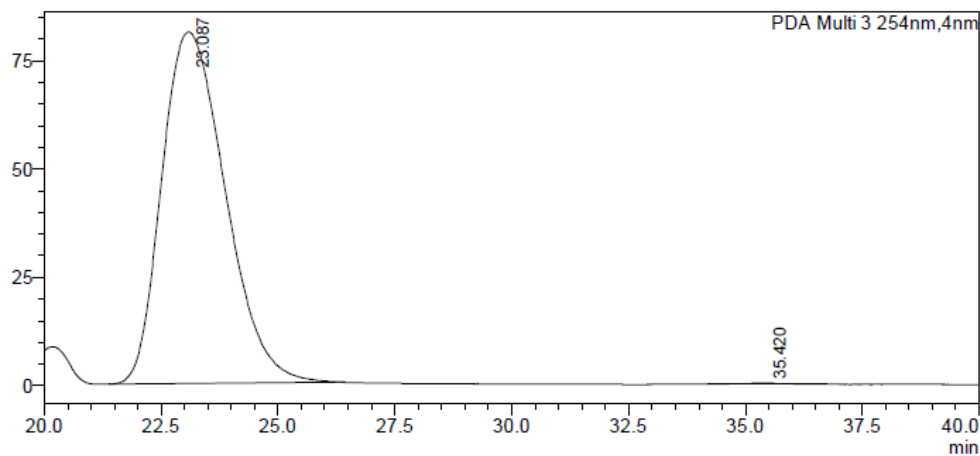

HPLC data compound **17**: Chiralpak AD-H, 99:1 hexane : IPA, flow rate 1 mLmin<sup>-1</sup>, 254 nm, 30 °C, >99% ee.

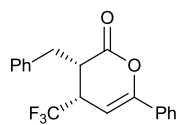

PDA Ch3 254nm

| Peak# | Ret. Time | Area     | Area%   |
|-------|-----------|----------|---------|
| 1     | 31.458    | 9051189  | 49.104  |
| 2     | 42.441    | 9381549  | 50.896  |
| Total |           | 18432738 | 100.000 |

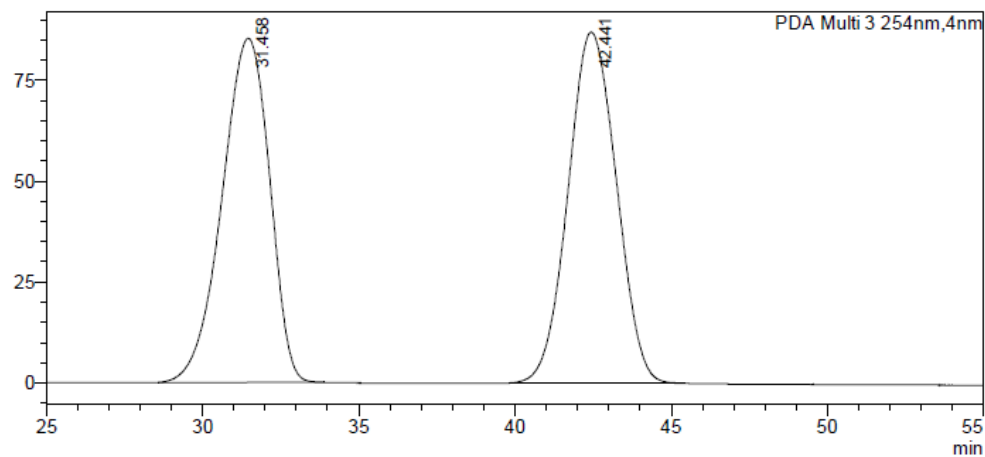

PDA Ch3 254nm

| Peak# | Ret. Time | Area      | Area%   |
|-------|-----------|-----------|---------|
| 1     | 35.020    | 173322    | 0.081   |
| 2     | 44.590    | 213929552 | 99.919  |
| Total |           | 214102874 | 100.000 |

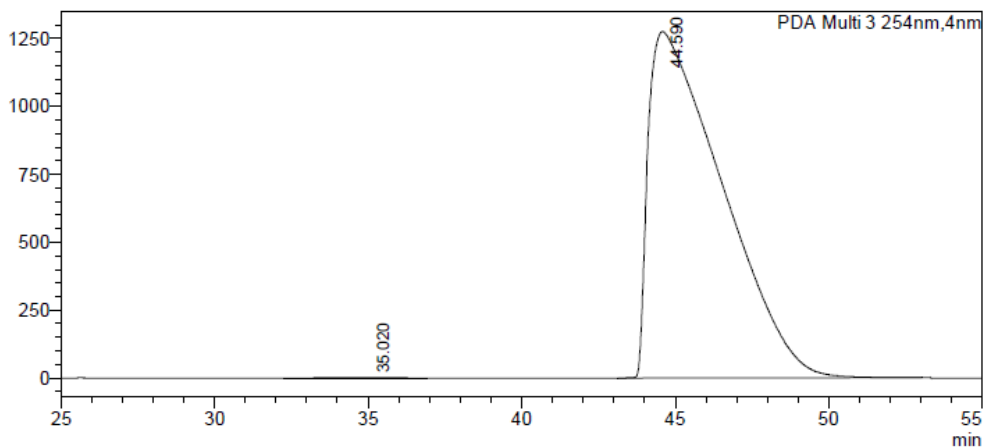

HPLC data compound **18**: Chiralpak AD-H, 98:2 hexane : IPA, flow rate 1 mLmin<sup>-1</sup>, 254 nm, 30 °C, >99% ee.

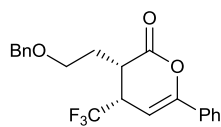

PDA Ch3 254nm

| Peak# | Ret. Time | Area     | Area%   |
|-------|-----------|----------|---------|
| 1     | 15.432    | 37400182 | 50.280  |
| 2     | 24.280    | 36984348 | 49.720  |
| Total |           | 74384530 | 100.000 |

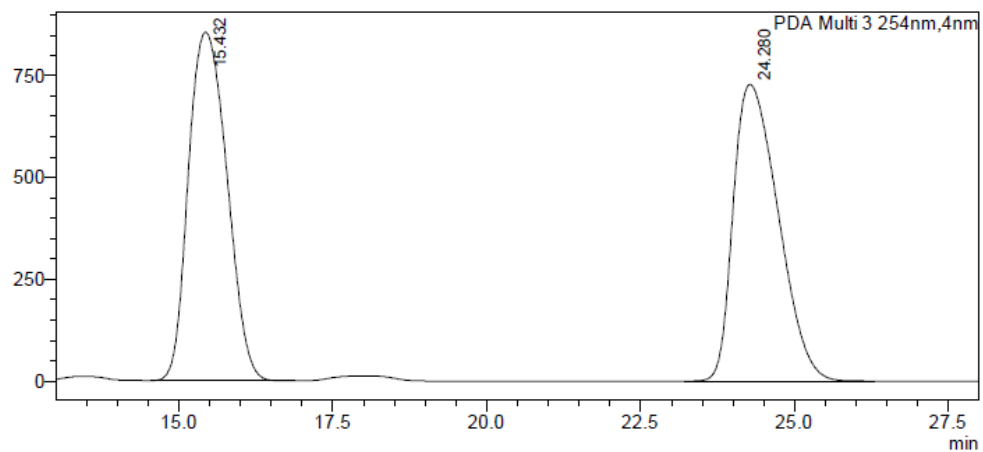

PDA Ch3 254nm

| Peak# | Ret. Time | Area     | Area%   |
|-------|-----------|----------|---------|
| 1     | 15.472    | 13489135 | 99.679  |
| 2     | 24.479    | 43477    | 0.321   |
| Total |           | 13532613 | 100.000 |

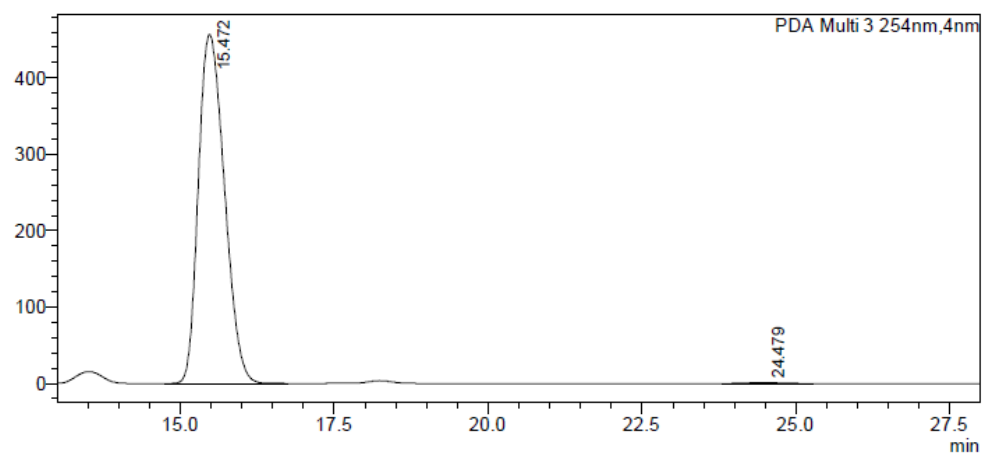



HPLC data compound **19**: Chiralcel OD-H, 95:5 hexane : IPA, flow rate 1 mLmin<sup>-1</sup>, 254 nm, 30 °C, 99% ee.

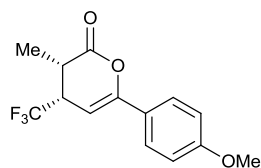

PDA Ch3 254nm

| Peak# | Ret. Time | Area    | Area%   |
|-------|-----------|---------|---------|
| 1     | 13.036    | 1607853 | 50.407  |
| 2     | 18.284    | 1581910 | 49.593  |
| Total |           | 3189763 | 100.000 |

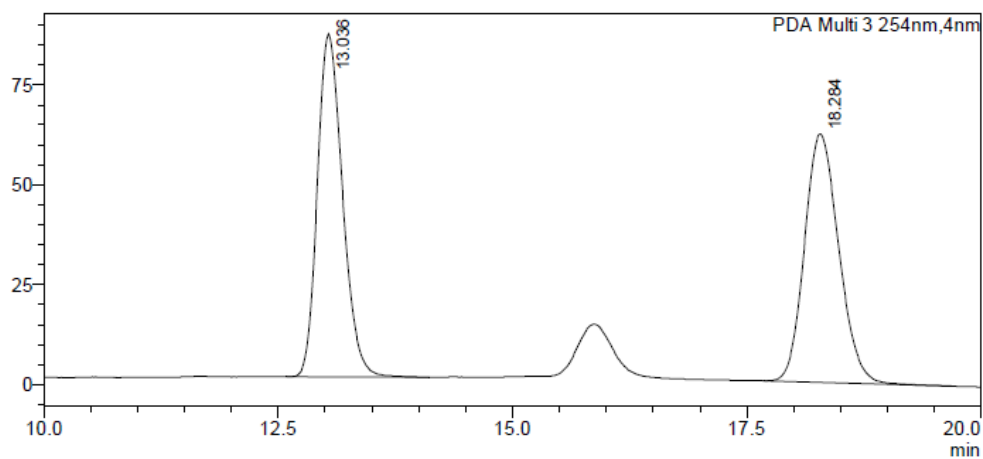

PDA Ch3 254nm

| Peak# | Ret. Time | Area    | Area%   |
|-------|-----------|---------|---------|
| 1     | 13.152    | 8948409 | 99.329  |
| 2     | 18.658    | 60411   | 0.671   |
| Total |           | 9008820 | 100.000 |

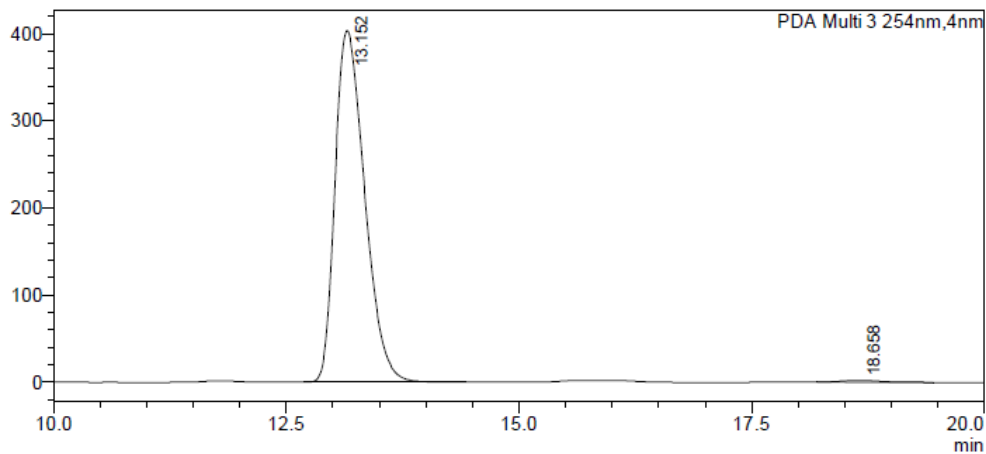

HPLC data compound **20**: Chiralcel OD-H 99:1 hexane : IPA, 1 mLmin<sup>-1</sup>, 254 nm, 30 °C, 99% ee.

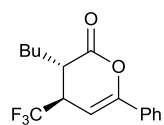

| PDA Ch3 254nm |           |          |         |
|---------------|-----------|----------|---------|
| Peak#         | Ret. Time | Area     | Area%   |
| 1             | 6.267     | 25613088 | 49.760  |
| 2             | 8.968     | 25860200 | 50.240  |
| Total         |           | 51473288 | 100.000 |

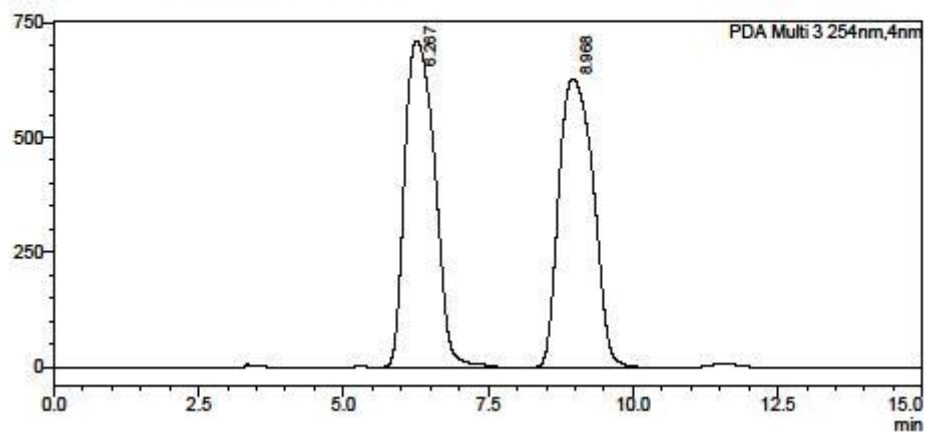

| PDA Ch3 254nm |           |          |         |
|---------------|-----------|----------|---------|
| Peak#         | Ret. Time | Area     | Area%   |
| 1             | 6.264     | 530860   | 0.707   |
| 2             | 8.927     | 74578107 | 99.293  |
| Total         |           | 75108967 | 100.000 |

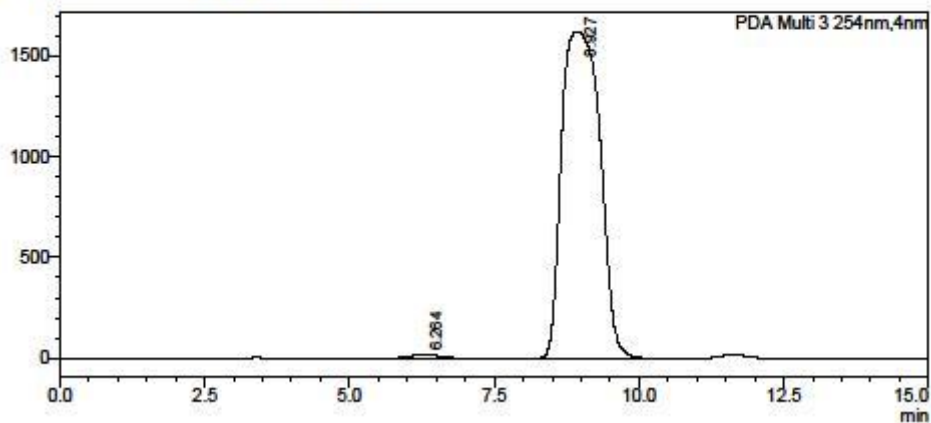

HPLC data compound **21**: Chiralpak IA, 99:1 hexane : IPA, flow rate 1 mLmin<sup>-1</sup>, 30 °C, 254 nm, 96% ee.

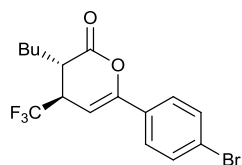

PDA Ch3 254nm

| Peak# | Ret. Time | Area     | Area%   |
|-------|-----------|----------|---------|
| 1     | 7.672     | 12954521 | 50.132  |
| 2     | 16.423    | 12886296 | 49.868  |
| Total |           | 25840818 | 100.000 |

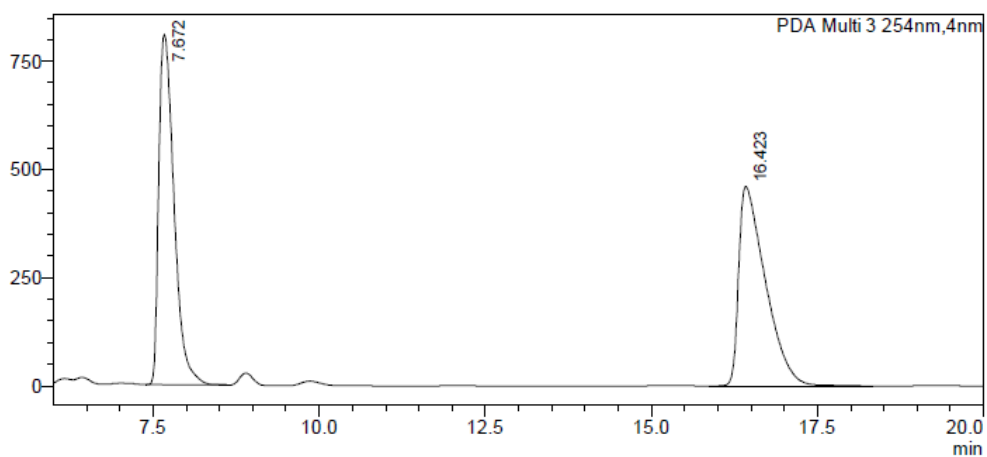

PDA Ch3 254nm

| Peak# | Ret. Time | Area     | Area%   |
|-------|-----------|----------|---------|
| 1     | 7.504     | 64466475 | 99.464  |
| 2     | 16.390    | 347554   | 0.536   |
| Total |           | 64814029 | 100.000 |

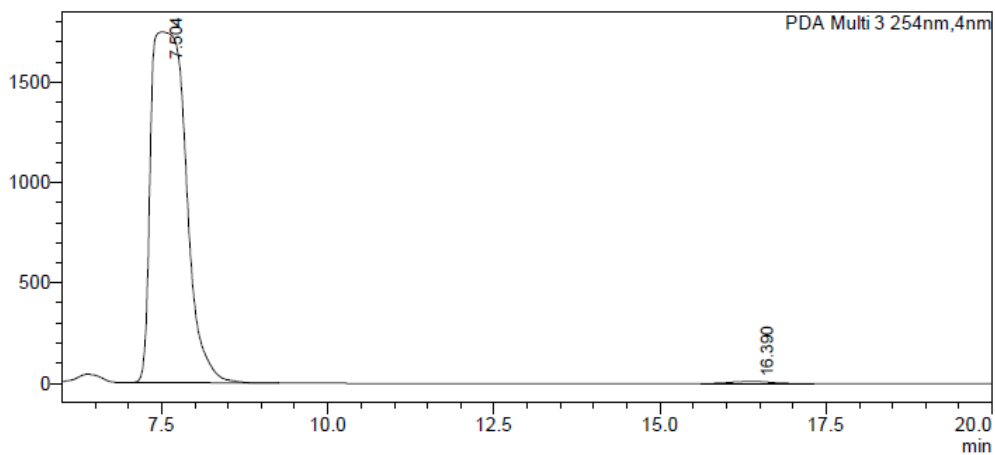

HPLC data compound **22**: Chiralpak IA, 99.8:0.2 hexane : IPA, flow rate 1 mLmin<sup>-1</sup>, 30 °C, 220 nm, 995:5 ee.

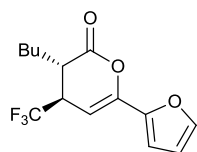

PDA Ch2 220nm

| Peak# | Ret. Time | Area     | Area%   |
|-------|-----------|----------|---------|
| 1     | 9.790     | 13076984 | 49.114  |
| 2     | 12.597    | 13548957 | 50.886  |
| Total |           | 26625941 | 100.000 |

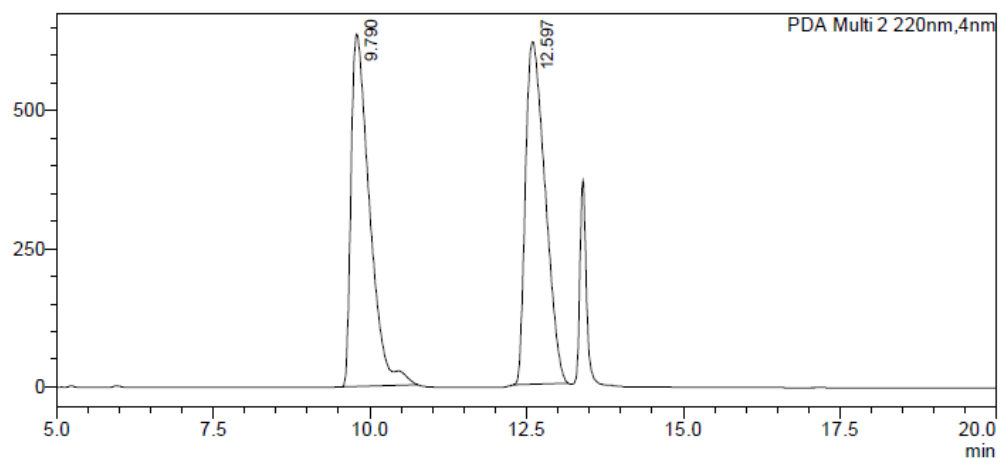

PDA Ch2 220nm

| Peak# | Ret. Time | Area     | Area%   |
|-------|-----------|----------|---------|
| 1     | 10.838    | 430605   | 2.449   |
| 2     | 13.757    | 17154545 | 97.551  |
| Total |           | 17585150 | 100.000 |

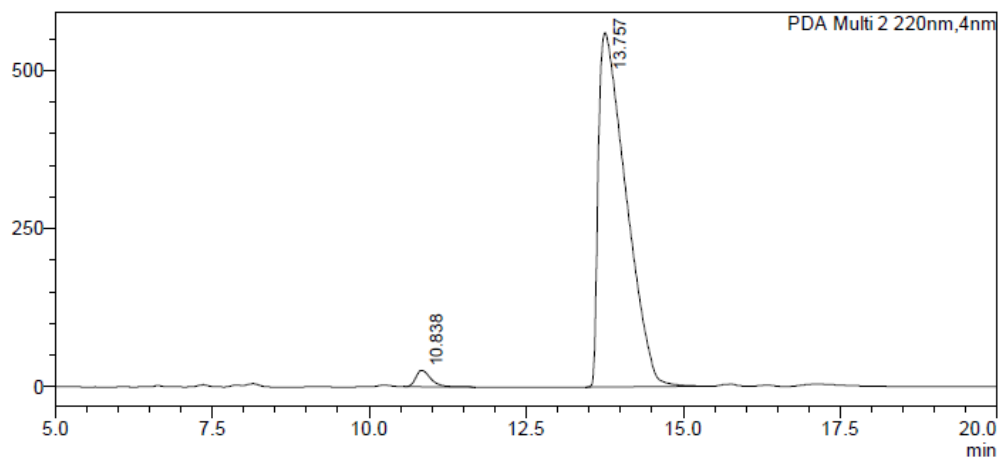

HPLC data compound **23**: Chiralcel OD-H, 99:1 hexane : IPA, flow rate 1 mLmin<sup>-1</sup>, 30 °C, 254 nm, 99% ee.

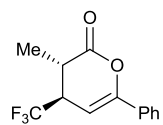

PDA Ch3 254nm

| Peak# | Ret. Time | Area     | Area%   |
|-------|-----------|----------|---------|
| 1     | 12.469    | 15966359 | 49.698  |
| 2     | 16.007    | 16160193 | 50.302  |
| Total |           | 32126552 | 100.000 |

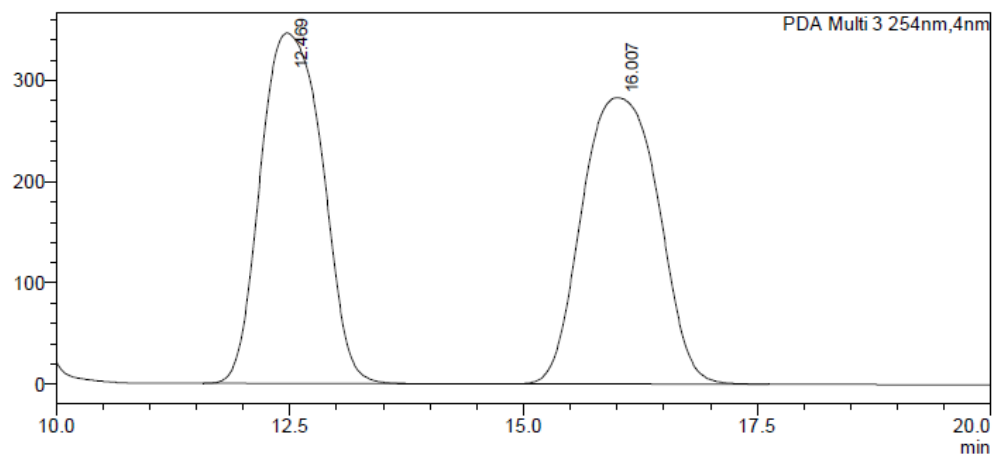

PDA Ch3 254nm

| Peak# | Ret. Time | Area     | Area%   |
|-------|-----------|----------|---------|
| 1     | 12.645    | 160654   | 0.632   |
| 2     | 15.981    | 25263535 | 99.368  |
| Total |           | 25424189 | 100.000 |

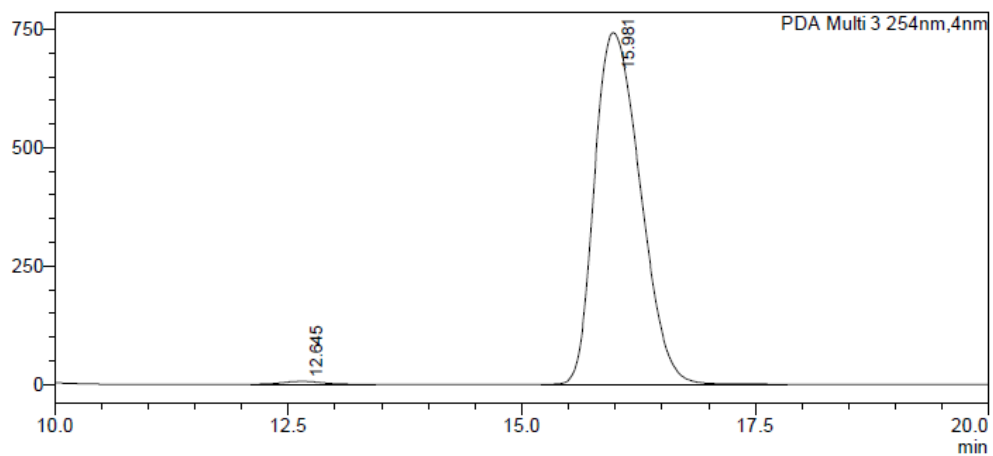

HPLC data compound **24**: Chiralcel OD-H, 98:2 hexane : IPA, flow rate 1 mLmin<sup>-1</sup>, 30 °C, 254 nm, 96% ee.

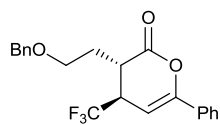

PDA Ch2 220nm

| Peak# | Ret. Time | Area     | Area%   |
|-------|-----------|----------|---------|
| 1     | 22.789    | 17139246 | 52.747  |
| 2     | 26.354    | 15353879 | 47.253  |
| Total |           | 32493125 | 100.000 |

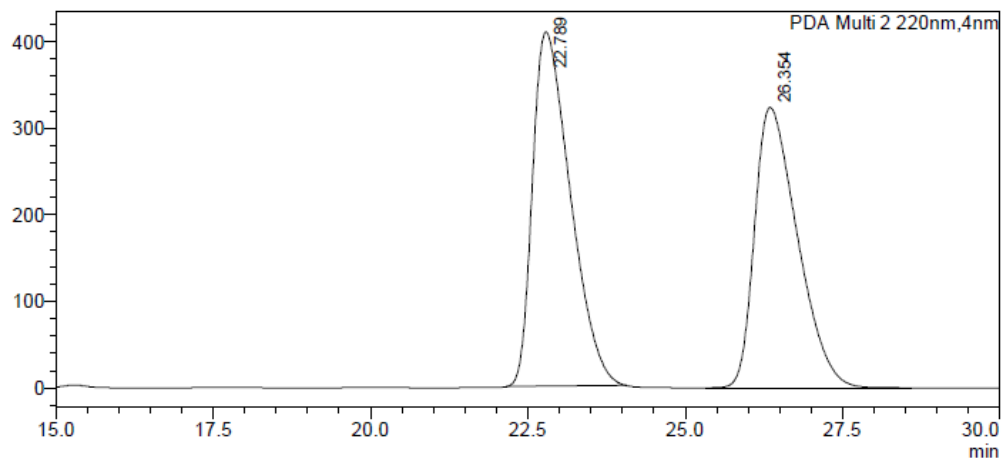

PDA Ch2 220nm

| Peak# | Ret. Time | Area     | Area%   |
|-------|-----------|----------|---------|
| 1     | 20.031    | 89895368 | 97.901  |
| 2     | 24.712    | 1927570  | 2.099   |
| Total |           | 91822938 | 100.000 |

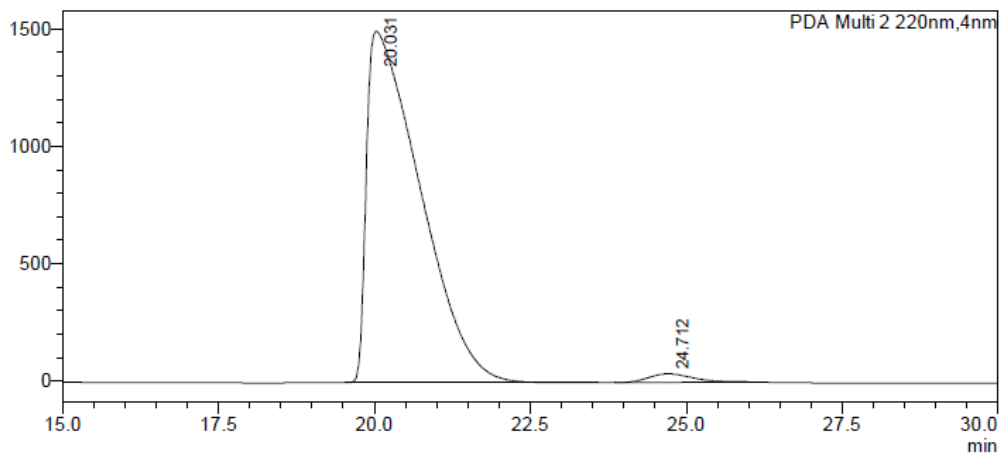

HPLC data compound **25**: Chiralcel OJ-H 95:5 hexane : IPA, 0.5 mLmin<sup>-1</sup>, 211 nm, 30 °C, 97% ee

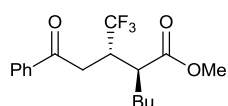

| PDA Ch1 211nm |           |         |
|---------------|-----------|---------|
| Peak#         | Ret. Time | Area%   |
| 1             | 9.959     | 49.225  |
| 2             | 11.295    | 50.775  |
| Total         |           | 100.000 |

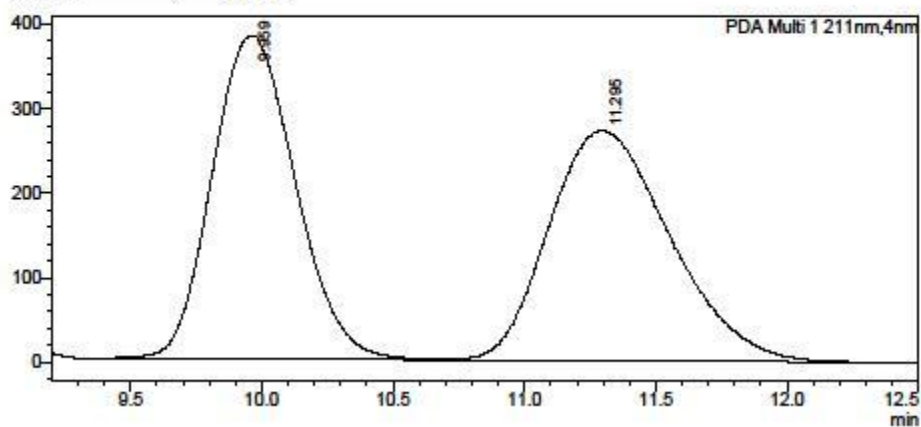

| PDA Ch1 211nm |           |         |
|---------------|-----------|---------|
| Peak#         | Ret. Time | Area%   |
| 1             | 9.990     | 98.231  |
| 2             | 11.136    | 1.769   |
| Total         |           | 100.000 |

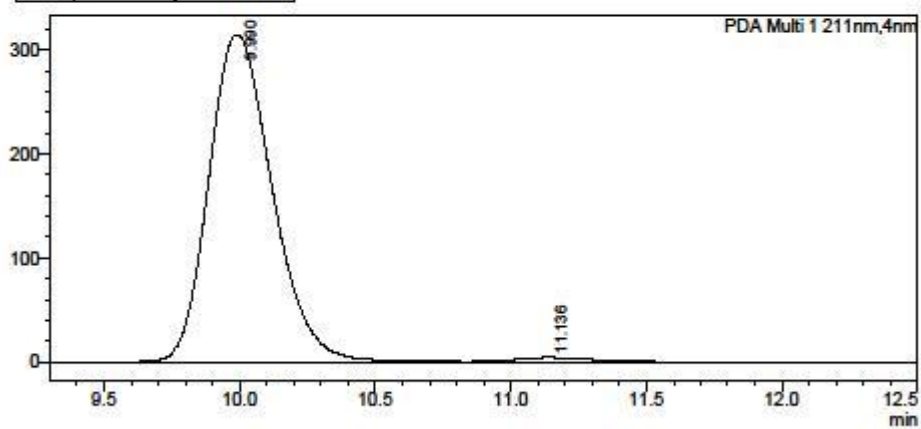

HPLC data compound **27**: Chiralpak AD-H 98:2 hexane : IPA, 1 mLmin<sup>-1</sup>, 254 nm, 30 °C, >995:5 ee

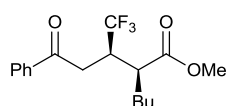

PDA Ch3 254nm

| Peak# | Ret. Time | Area%   |
|-------|-----------|---------|
| 1     | 5.382     | 49.740  |
| 2     | 6.458     | 50.260  |
| Total |           | 100.000 |

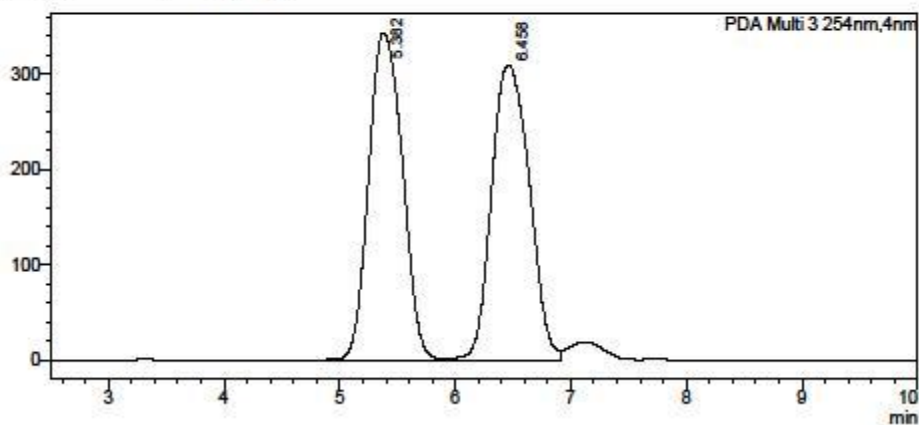

PDA Ch1 211nm

| Peak# | Ret. Time | Area%   |
|-------|-----------|---------|
| 1     | 5.291     | 0.437   |
| 2     | 6.354     | 99.563  |
| Total |           | 100.000 |

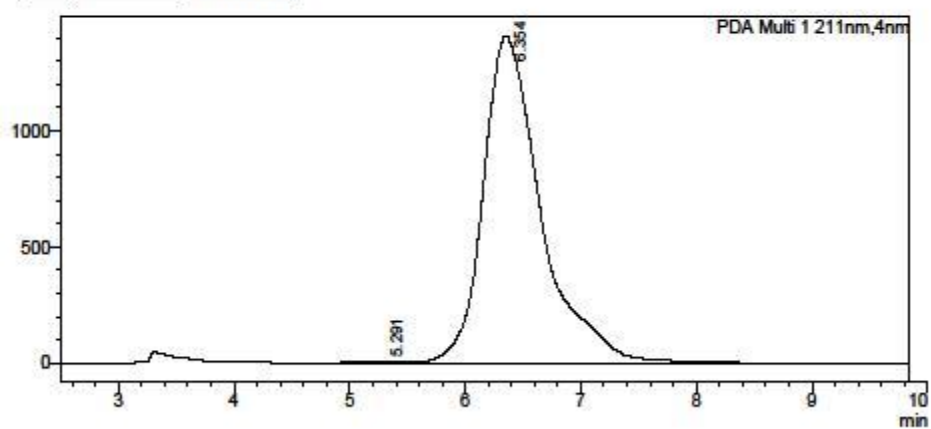



## X-Ray Crystal Structure of *syn*-12

See CIF file for full crystallographic details.

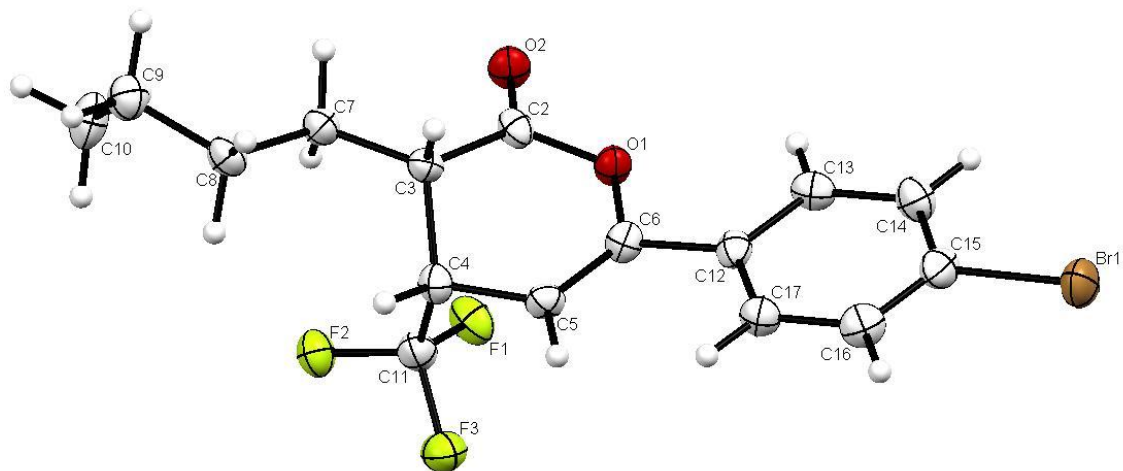

Thermal ellipsoid contours shown at 50% probability level
